# Supplementary material for: Genome-Wide Analysis of the TCP Transcription Factor Gene Family in Pepper (Capsicum annuum L.)
Source: MDPI journal article supplement (doi:10.3390/plants13050641), 2024-02-26
Supplement: s1 [file s1]

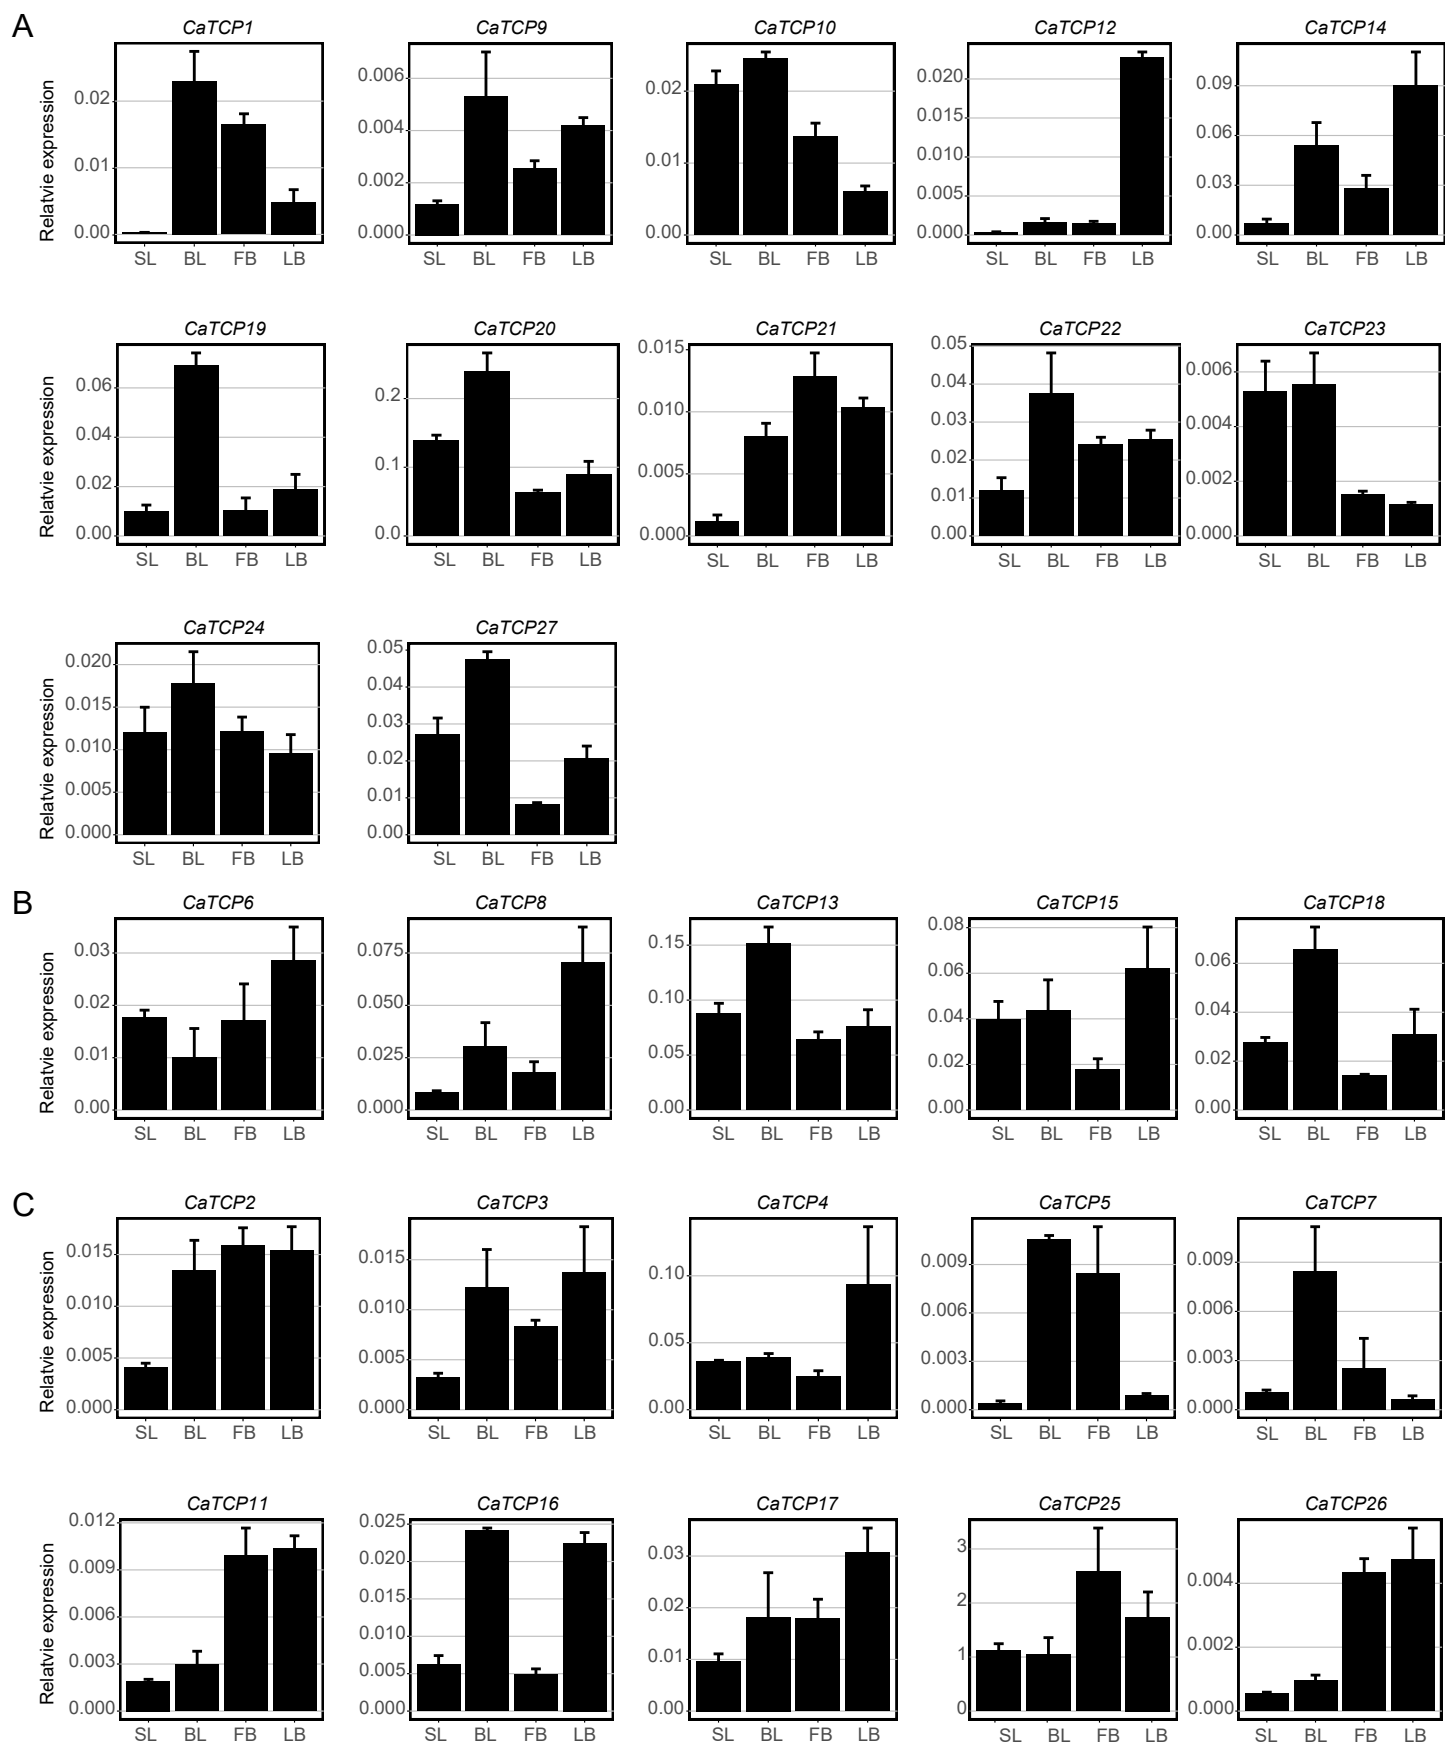

**Figure S1** : Relative expression levels of 27 *CaTCPs* in stem leaf (SL), branch leaf (BL), flower bud (FB) and lateral bud (LB). **(A)** The expression levels of Class I *CaTCPs*, **(B)** subclass CYC/TB1 belonging to Class II, and **(C)** subclass CIN belonging to Class II. The value was mean of three replicates. SD was represented using error bar. Raw data were recorded in Table S8,  $2^{-\Delta\Delta CT}$  method was used to calculate relative expression level.
