# Supplementary material for: Genome-Wide Analysis of the TCP Transcription Factor Gene Family in Pepper (Capsicum annuum L.)
Source: MDPI journal article supplement (doi:10.3390/plants13050641), 2024-02-26
Supplement: s1 [file s1]

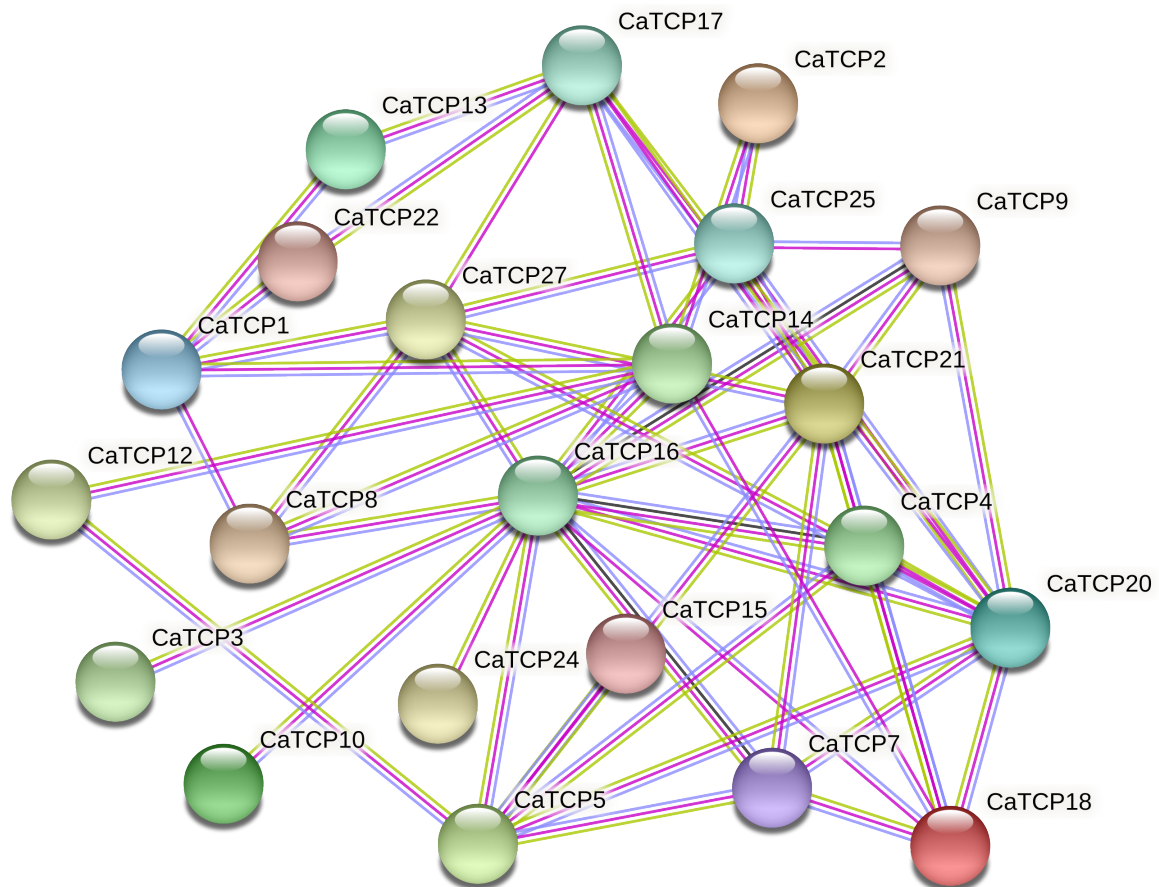

#### Predicted interactions

- Gene neighborhood
- Gene fusions
- Gene co-occurrence

#### Others

- Textmining
- Co-expression
- protein homology

#### Known interactions

- From curated databases
- Experimentally determined

**Figure S2:** Predicted protein-protein interaction network of CaTCP proteins. Different data sources are remarked by various colors of the line. The String website was used to predict the protein-protein interaction network.
