# Supplementary material for: Genome-Wide Analysis of the TCP Transcription Factor Gene Family in Pepper (Capsicum annuum L.)
Source: MDPI journal article supplement (doi:10.3390/plants13050641), 2024-02-26
Supplement: s1 [file s1]

A

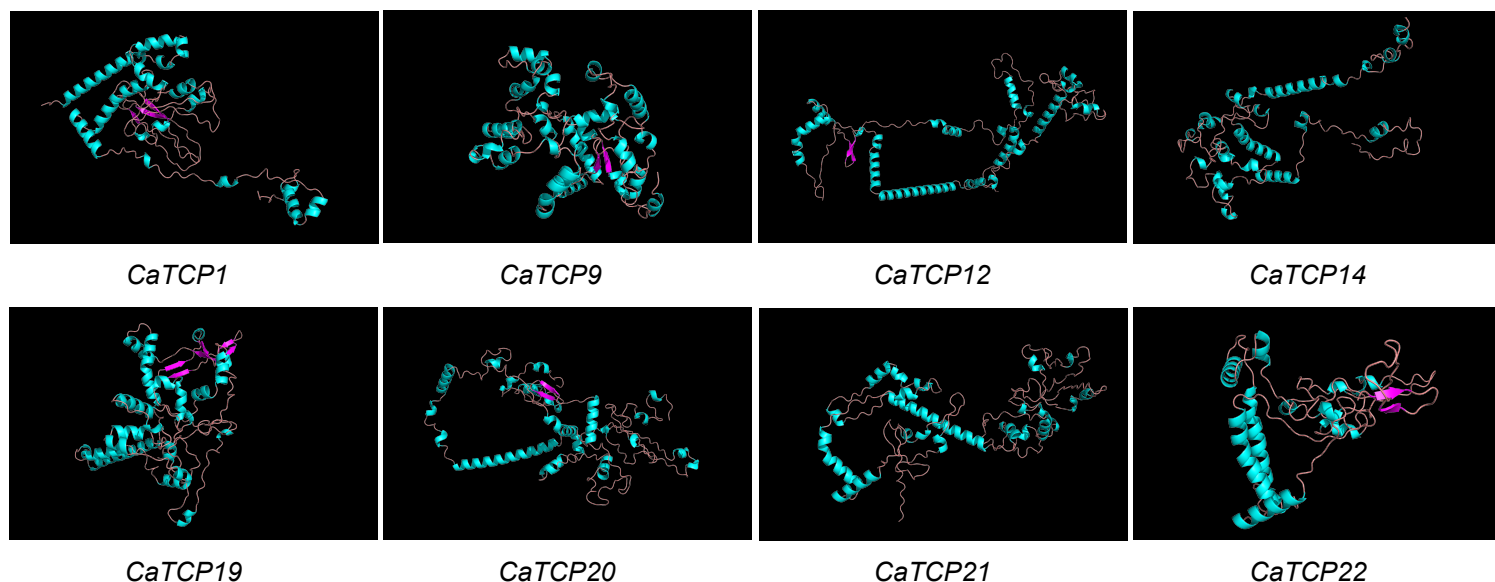

B

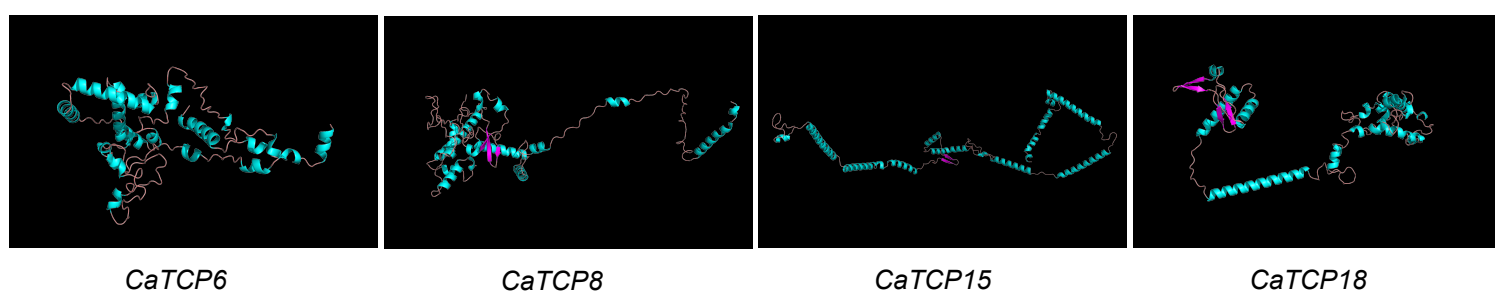

C

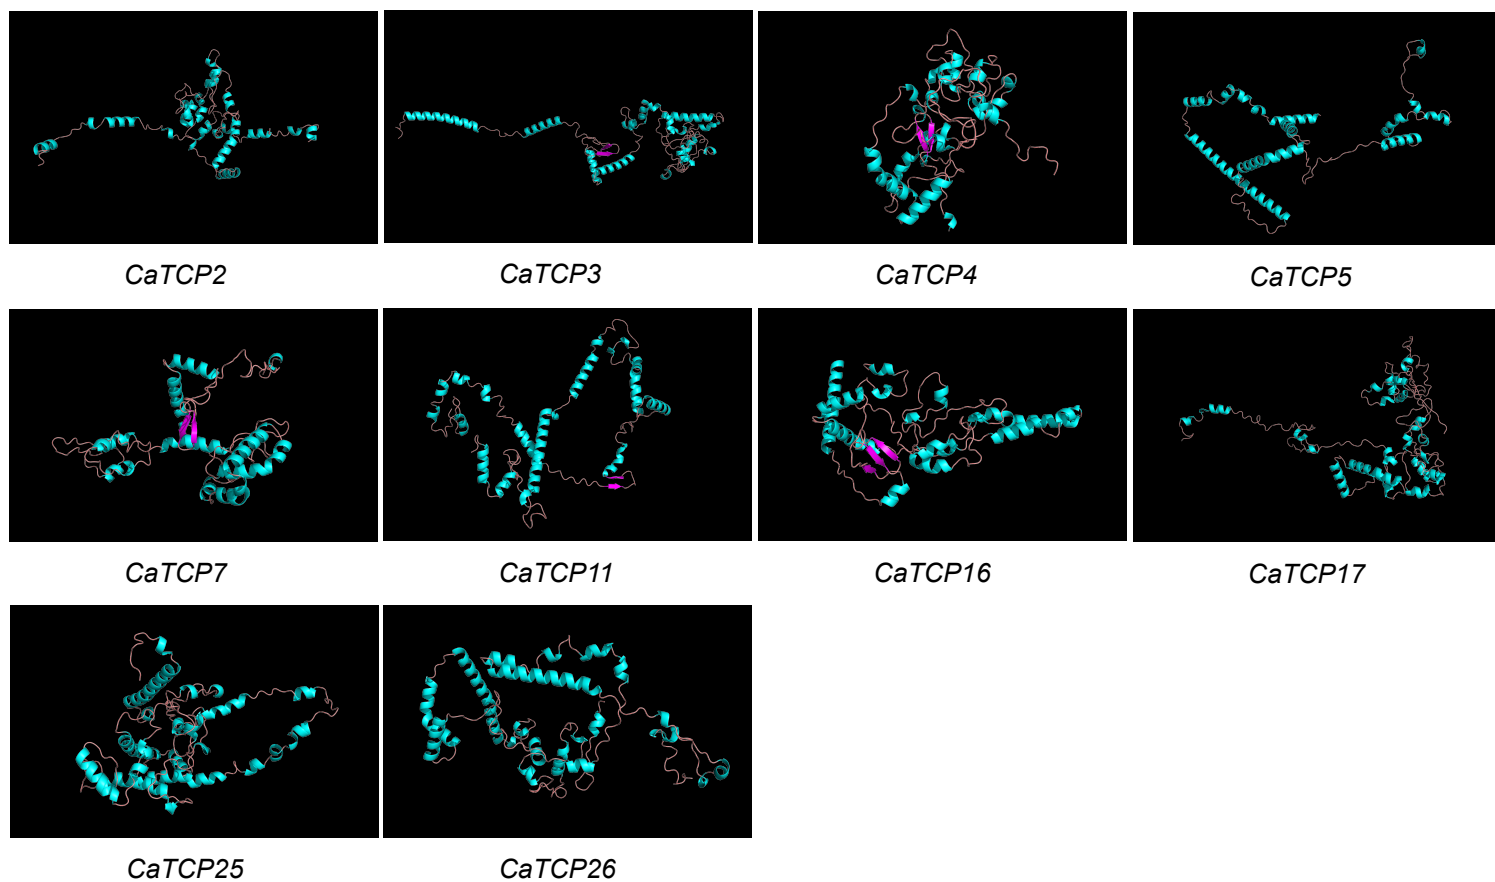

**Figure S3:** Predicted 3-dimensional models of CaTCP proteins, and  $\alpha$ -helices,  $\beta$ -sheets, and random coils are remarked by cyan, red, and brown, respectively. **(A)** The Predicted 3-dimensional model of PCF subclass members. **(B)** The Predicted 3-dimensional model of CYC/TB1 subclass members. **(C)** The Predicted 3-dimensional model of CIN subclass members. AlphaFold2 website serve was used to predict the Three-Dimensional structure of CaTCP proteins.
