# Supplementary material for: Genome-Wide Analysis of the TCP Transcription Factor Gene Family in Pepper (Capsicum annuum L.)
Source: Plants (Basel). 2024 Feb 26;13(5):641. doi: 10.3390/plants13050641 (PMC10934501; doi:10.3390/plants13050641)
Supplement: Supplementary file 1 [file plants-13-00641-s001.zip › Supplementary Table S1.xlsx]

## Sheet: Sheet1
Table S1: TCPs in the pepper
Gene ID	Annotation ID	Genomic position (bp)	CDS length (bp)	Gene length (bp)	Protein length (aa	Type	Subcellular localization
CaTCP1	CA.PGAv.1.6. scaffold981.52	chr01: 7329314-7330409:-	1033	1095	344	PCF	Nucleus
CaTCP2	CA.PGAv.1.6. scaffold1525.3	chr02: 114683614-114684471:-	857	857	285	CIN	Nucleus
CaTCP3	CA.PGAv.1.6. scaffold79.60	chr02: 128950309-128951400:-	1091	1091	363	CIN	Nucleus
CaTCP4	CA.PGAv.1.6. scaffold497.97	chr02: 162280087-162280971:+	884	884	294	CIN	Nucleus
CaTCP5	CA.PGAv.1.6. scaffold497.4	chr02: 163919378-163920300:-	847	922	282	CIN	Nucleus
CaTCP6	CA.PGAv.1.6. scaffold473.122	chr02: 168924511-168925395:+	884	884	294	CYC/TB1	Nucleus
CaTCP7	CA.PGAv.1.6. scaffold93.57	chr02: 99918177-99919408:+	895	1231	298	CIN	Cytology
CaTCP8	CA.PGAv.1.6. scaffold1097.6	chr03: 217431934-217432992:+	1058	1058	352	CYC/TB1	Nucleus
CaTCP9	CA.PGAv.1.6. scaffold1228.15	chr03: 271419193-271420278:-	1085	1085	361	PCF	Nucleus
CaTCP10	CA.PGAv.1.6. scaffold407.118	chr03: 273301638-273302971:+	1252	1333	417	PCF	Nucleus
CaTCP11	CA.PGAv.1.6. scaffold438.114	chr03: 279073602-279074704:+	997	1102	332	CIN	Nucleus
CaTCP12	CA.PGAv.1.6. scaffold148.1	chr05: 165112101-165113285:+	1184	1184	394	PCF	Nucleus
CaTCP13	CA.PGAv.1.6. scaffold619.8	chr05: 18325887-18326552:-	665	665	221	CYC/TB1	Nucleus
CaTCP14	CA.PGAv.1.6. scaffold308.67	chr06: 206948554-206949541:+	919	987	306	PCF	Nucleus
CaTCP15	CA.PGAv.1.6. scaffold587.77	chr06: 223329428-223330767:+	1075	1339	358	CYC/TB1	Nucleus
CaTCP16	CA.PGAv.1.6. scaffold587.49	chr06: 223882708-223883640:-	932	932	310	CIN	Nucleus
CaTCP17	CA.PGAv.1.6. scaffold628.26	chr06: 225342299-225343622:+	1249	1323	416	CIN	Nucleus
CaTCP18	CA.PGAv.1.6. scaffold1360.1	chr07: 229346345-229347268:-	923	923	307	CYC/TB1	Nucleus
CaTCP19	CA.PGAv.1.6. scaffold162.24	chr07: 241295386-241296567:+	1181	1181	393	PCF	Nucleus
CaTCP20	CA.PGAv.1.6. scaffold103.8	chr08: 54041395-54042681:+	1286	1286	428	PCF	Nucleus
CaTCP21	CA.PGAv.1.6. scaffold103.7	chr08: 54147276-54148526:-	1250	1250	416	PCF	Nucleus
CaTCP22	CA.PGAv.1.6. scaffold282.50	chr08: 881446-882249:+	803	803	267	PCF	Nucleus
CaTCP23	CA.PGAv.1.6. scaffold349.9	chr09: 232794763-232795887:-	1124	1124	374	PCF	Nucleus
CaTCP24	CA.PGAv.1.6. scaffold900.51	chr09: 5612731-5613345:+	614	614	204	PCF	Nucleus
CaTCP25	CA.PGAv.1.6. scaffold58.46	chr11: 26024496-26025596:-	1100	1100	366	CIN	Nucleus
CaTCP26	CA.PGAv.1.6. scaffold184.85	chr11: 8463840-8464880:-	1040	1040	346	CIN	Nucleus
CaTCP27	CA.PGAv.1.6. scaffold798.44	PGAv.1.6.scaffold798: 715482-717131:+	1649	1649	549	PCF	Nucleus
The number designation of the TCP genes is based on their order of chromosome location, Blastp and HMMER were used to search CaTCPs with the e-value set to 1e-5.
