# Supplementary material for: Genome-Wide Analysis of the TCP Transcription Factor Gene Family in Pepper (Capsicum annuum L.)
Source: Plants (Basel). 2024 Feb 26;13(5):641. doi: 10.3390/plants13050641 (PMC10934501; doi:10.3390/plants13050641)
Supplement: Supplementary file 1 [file plants-13-00641-s001.zip › Supplementary Table S2.xlsx]

## Sheet: Table S1
Table S2: The protein sequences of TCP family genes in Arabidopsis thaliana, Oryza sativa, Solanum tuberosum , and Solanum lycopersicum.
Gene ID	Gene name	Protein sequence
AtTCP1	AT1G67260.1	MSSSTNDYNDGNNNGVYPLSLYLSSLSGHQDIIHNPYNHQLKASPGHMVSAVPESLIDYMAFKSNNVVNQQGFEFPEVSKEIKKVVKKDRHSKIQTAQGIRDRRVRLSIGIARQFFDLQDMLGFDKASKTLDWLLKKSRKAIKEVVQAKNLNNDDEDFGNIGGDVEQEEEKEEDDNGDKSFVYGLSPGYGEEEVVCEATKAGIRKKKSELRNISSKGLGAKARGKAKERTKEMMAYDNPETASDITQSEIMDPFKRSIVFNEGEDMTHLFYKEPIEEFDNQESILTNMTLPTKMGQSYNQNNGILMLVDQSSSSNYNTFLPQNLDYSYDQNPFHDQTLYVVTDKNFPKGKVWIQDSFVN*
AtTCP2	AT4G18390.1	MIGDLMKNNNNGDVVDNEVNNRLSRWHHNSSRIIRVSRASGGKDRHSKVLTSKGPRDRRVRLSVSTALQFYDLQDRLGYDQPSKAVEWLIKAAEDSISELPSLNNTHFPTDDENHQNQTLTTVAANSLSKSACSSNSDTSKNSSGLSLSRSELRDKARERARERTAKETKERDHNHTSFTDLLNSGSDPVNSNRQWMASAPSSSPMEYFSSGLILGSGQQTHFPISTNSHPFSSISDHHHHHPHHQHQEFSFVPDHLISPAESNGGAFNLDFNMSTPSGAGAAVSAASGGGFSGFNRGTLQSNSTNQHQSFLANLQRFPTSESGGGPQFLFGALPAENHHHNHQFQLYYENGCRNSSEHKGKGKN*
AtTCP3	AT1G53230.1	MAPDNDHFLDSPSPPLLEMRHHQSATENGGGCGEIVEVQGGHIVRSTGRKDRHSKVCTAKGPRDRRVRLSAPTAIQFYDVQDRLGFDRPSKAVDWLITKAKSAIDDLAQLPPWNPADTLRQHAAAAANAKPRKTKTLISPPPPQPEETEHHRIGEEEDNESSFLPASMDSDSIADTIKSFFPVASTQQSYHHQPPSRGNTQNQDLLRLSLQSFQNGPPFPNQTEPALFSGQSNNQLAFDSSTASWEQSHQSPEFGKIQRLVSWNNVGAAESAGSTGGFVFASPSSLHPVYSQSQLLSQRGPLQSINTPMIRAWFDPHHHHHHHQQSMTTDDLHHHHPYHIPPGIHQSAIPGIAFASSGEFSGFRIPARFQGEQEEHGGDNKPSSASSDSRH*
AtTCP4	AT3G15030.1	MSDDQFHHPPPPSSMRHRSTSDAADGGCGEIVEVQGGHIVRSTGRKDRHSKVCTAKGPRDRRVRLSAHTAIQFYDVQDRLGFDRPSKAVDWLIKKAKTSIDELAELPPWNPADAIRLAAANAKPRRTTAKTQISPSPPPPQQQQQQQQLQFGVGFNGGGAEHPSNNESSFLPPSMDSDSIADTIKSFFPVIGSSTEAPSNHNLMHNYHHQHPPDLLSRTNSQNQDLRLSLQSFPDGPPSLLHHQHHHHTSASASEPTLFYGQSNPLGFDTSSWEQQSSEFGRIQRLVAWNSGGGGGATDTGNGGGFLFAPPTPSTTSFQPVLGQSQQLYSQRGPLQSSYSPMIRAWFDPHHHHQSISTDDLNHHHHLPPPVHQSAIPGIGFASGEFSSGFRIPARFQGQ…
AtTCP5	AT5G60970.1	MRSGECDEEEIQAKQERDQNQNHQVNLNHMLQQQQPSSVSSSRQWTSAFRNPRIVRVSRTFGGKDRHSKVCTVRGLRDRRIRLSVPTAIQLYDLQDRLGLSQPSKVIDWLLEAAKDDVDKLPPLQFPHGFNQMYPNLIFGNSGFGESPSSTTSTTFPGTNLGFLENWDLGGSSRTRARLTDTTTTQRESFDLDKGKWIKNDENSNQDHQGFNTNHQQQFPLTNPYNNTSAYYNLGHLQQSLDQSGNNVTVAISNVAANNNNNLNLHPPSSSAGDGSQLFFGPTPPAMSSLFPTYPSFLGASHHHHVVDGAGHLQLFSSNSNTASQQHMMPGNTSLIRPFHHLMSSNHDTDHHSSDNESDS*
AtTCP6	AT5G41030.1	MVMEPKKNQNLPSFLNPSRQNQDNDKKRKQTEVKGFDIVVGEKRKKKENEEEDQEIQILYEKEKKKPNKDRHLKVEGRGRRVRLPPLCAARIYQLTKELGHKSDGETLEWLLQHAEPSILSATVNGIKPTESVVSQPPLTADLMICHSVEEASRTQMEANGLWRNETGQTIGGFDLNYGIGFDFNGVPEIGFGDNQTPGLELRLSQVGVLNPQVFQQMGKEQFRVLHHHSHEDQQQSAEENGS*
AtTCP7	AT5G23280.1	MSINNNNNNNNNNNDGLMISSNGALIEQQPSVVVKKPPAKDRHSKVDGRGRRIRMPIICAARVFQLTRELGHKSDGQTIEWLLRQAEPSIIAATGTGTTPASFSTASVSIRGATNSTSLDHKPTSLLGGTSPFILGKRVRADEDSNNSHNHSSVGKDETFTTTPAGFWAVPARPDFGQVWSFAGAPQEMFLQQQHHHQQPLFVHQQQQQQAAMGEASAARVGNYLPGHLNLLASLSGGSPGSDRREEDPR*
AtTCP8	AT1G58100.1	MDLSDIRNNNNDTAAVATGGGARQLVDASLSIVPRSTPPEDSTLATTSSTATATTTKRSTKDRHTKVDGRGRRIRMPALCAARVFQLTRELGHKSDGETIEWLLQQAEPAIVAATGTGTIPANFSTLSVSLRSSGSTLSAPPSKSVPLYGALGLTHHQYDEQGGGGVFAAHTSPLLGFHHQLQHHQNQNQNQDPVETIPEGENFSRKRYRSVDLSKENDDRKQNENKSLKESETSGPTAAPMWAVAPPSRSGAGNTFWMLPVPTTAGNQMESSSNNNTAAGHRAPPMWPFVNSAGGGAGGGGGAATHFMAGTGFSFPMDQYRGSPLQLGSFLAQPQPTQNLGLSMPDSNLGMLAALNSAYSRGGNANANAEQANNAVEHQEKQQQSDHDDDSREENSNS…
AtTCP9	AT2G45680.1	MATIQKLEEVAGKDQTLRAVDLTIINGVRNVETSRPFQVNPTVSLEPKAEPVMPSFSMSLAPPSSTGPPLKRASTKDRHTKVEGRGRRIRMPATCAARIFQLTRELGHKSDGETIRWLLENAEPAIIAATGTGTVPAIAMSVNGTLKIPTTTNADSDMGENLMKKKRKRPSNSEYIDISDAVSASSGLAPIATTTTIQPPQALASSTVAQQLLPQGMYPMWAIPSNAMIPTVGAFFLIPQIAGPSNQPQLLAFPAAAASPSSYVAAVQQASTMARPPPLQVVPSSGFVSVSDVSGSNLSRATSVMAPSSSSGVTTGSSSSIATTTTHTLRDFSLEIYEKQELHQFMSTTTARSSNH*
ATCP10	AT2G31070.1	MGLKGYSVGEGGGEIVEVQGGHIIRATGRKDRHSKVFTSKGPRDRRVRLSAHTAIQFYDVQDRLGYDRPSKAVDWLIKKAKTAIDKLELGETTTTTTRQEPVNTKPESPTLVFQRENNDQTQFVAANLDPEDAMKTFFPATTTTNGGGGTNINFQNYPHQDDNNMVSRTTTPPPNLSQDLGLSLHPFQGNNNTVVVPETNNFTTTHFDTFGRISGWNHHDLTMTSSSSSEHQQQEQEERSNGGFMVNHHPHHHHHQPSMMTLLNSQQQQVFLGGQQQQQQRGTLQSSLFPHSFRSWDHHQTTSDHHHHQNQASSMFASSSQYGSHGMMMMQGLSFPNTTRLLHGEEATQPNSSSSPPNSHL*
AtTCP11	AT2G37000.1	MIFQNVCRNESNFNAIASESRSQTQFGVSKSSSSGGGCISARTKDRHTKVNGRSRRVTMPALAAARIFQLTRELGHKTEGETIEWLLSQAEPSIIAATGYGTKLISNWVDVAADDSSSSSSMTSPQTQTQTPQSPSCRLDLCQPIGIQYPVNGYSHMPFTAMLLEPMTTTAESEVEIAEEEERRRRHH*
AtTCP12	AT1G68800.1	MFPSLDTNGYDLFDPFIPHQTTMFPSFITHIQSPNSHHHYSSPSFPFSSDFLESFDESFLINQFLLQQQDVAANVVESPWKFCKKLELKKKNEKCVDGSTSQEVQWRRTVKKRDRHSKICTAQGPRDRRMRLSLQIARKFFDLQDMLGFDKASKTIEWLFSKSKTSIKQLKERVAASEGGGKDEHLQVDEKEKDETLKLRVSKRRTKTMESSFKTKESRERARKRARERTMAKMKMRLFETSETISDPHQETREIKITNGVQLLEKENKEQEWSNTNDVHMVEYQMDSVSIIEKFLGLTSDSSSSSIFGDSEECYTSLSSVRGMSTPREHNTTSIATVDEEKSPISSFSLYDYLCY*
AtTCP13	AT3G02150.1	MNIVSWKDANDEVAGGATTRREREVKEDQEETEVRATSGKTVIKKQPTSISSSSSSWMKSKDPRIVRVSRAFGGKDRHSKVCTLRGLRDRRVRLSVPTAIQLYDLQERLGVDQPSKAVDWLLDAAKEEIDELPPLPISPENFSIFNHHQSFLNLGQRPGQDPTQLGFKINGCVQKSTTTSREENDREKGENDVVYTNNHHVGSYGTYHNLEHHHHHHQHLSLQADYHSHQLHSLVPFPSQILVCPMTTSPTTTTIQSLFPSSSSAGSGTMETLDPRQM*
AtTCP14	AT3G47620.1	MQKPTSSILNVIMDGGDSVGGGGGDDHHRHLHHHHRPTFPFQLLGKHDPDDNHQQQPSPSSSSSLFSLHQHQQLSQSQPQSQSQKSQPQTTQKELLQTQEESAVVAAKKPPLKRASTKDRHTKVDGRGRRIRMPALCAARVFQLTRELGHKSDGETIEWLLQQAEPSVIAATGTGTIPANFTSLNISLRSSGSSMSLPSHFRSAASTFSPNNIFSPAMLQQQQQQQRGGGVGFHHPHLQGRAPTSSLFPGIDNFTPTTSFLNFHNPTKQEGDQDSEELNSEKKRRIQTTSDLHQQQQQHQHDQIGGYTLQSSNSGSTATAAAAQQIPGNFWMVAAAAAAGGGGGNNNQTGGLMTASIGTGGGGGEPVWTFPSINTAAAALYRSGVSGVPSGAVSSGLHF…
AtTCP15	AT1G69690.1	MDPDPDHNHRPNFPLQLLDSSTSSSSTSLAIISTTSEPNSEPKKPPPKRTSTKDRHTKVEGRGRRIRMPAMCAARVFQLTRELGHKSDGETIEWLLQQAEPAVIAATGTGTIPANFTSLNISLRSSRSSLSAAHLRTTPSSYYFHSPHQSMTHHLQHQHQVRPKNESHSSSSSSSQLLDHNQMGNYLVQSTAGSLPTSQSPATAPFWSSGDNTQNLWAFNINPHHSGVVAGDVYNPNSGGSGGGSGVHLMNFAAPIALFSGQPLASGYGGGGGGGGEHSHYGVLAALNAAYRPVAETGNHNNNQQNRDGDHHHNHQEDGSTSHHS*
AtTCP16	AT3G45150.1	MDSKNGINNSQKARRTPKDRHLKIGGRDRRIRIPPSVAPQLFRLTKELGFKTDGETVSWLLQNAEPAIFAATGHGVTTTSNEDIQPNRNFPSYTFNGDNISNNVFPCTVVNTGHRQMVFPVSTMTDHAPSTNYSTISDNYNSTFNGNATASDTTSAATTTATTTV*
AtTCP17	AT5G08070.1	MGIKKEDQKSSLSLLTQRWNNPRIVRVSRAFGGKDRHSKVCTVRGLRDRRIRLSVMTAIQVYDLQERLGLSQPSKVIDWLLEVAKNDVDLLPPLQFPPGFHQLNPNLTGLGESFPGVFDLGRTQREALDLEKRKWVNLDHVFDHIDHHNHFSNSIQSNKLYFPTITSSSSSYHYNLGHLQQSLLDQSGNVTVAFSNNYNNNNLNPPAAETMSSLFPTRYPSFLGGGQLQLFSSTSSQPDHIE*
AtTCP18	AT3G18550.1	MNNNIFSTTTTINDDYMLFPYNDHYSSQPLLPFSPSSSINDILIHSTSNTSNNHLDHHHQFQQPSPFSHFEFAPDCALLTSFHPENNGHDDNQTIPNDNHHPSLHFPLNNTIVEQPTEPSETINLIEDSQRISTSQDPKMKKAKKPSRTDRHSKIKTAKGTRDRRMRLSLDVAKELFGLQDMLGFDKASKTVEWLLTQAKPEIIKIATTLSHHGCFSSGDESHIRPVLGSMDTSSDLCELASMWTVDDRGSNTNTTETRGNKVDGRSMRGKRKRPEPRTPILKKLSKEERAKARERAKGRTMEKMMMKMKGRSQLVKVVEEDAHDHGEIIKNNNRSQVNRSSFEMTHCEDKIEELCKNDRFAVCNEFIMNKKDHISNESYDLVNYKPNSSFPVINHHRS…
AtTCP19	AT5G51910.1	MESNHEGNAIQVIDQVTTMTHLSDPNPKTKPGMMLMKQEDGYLQPVKTKPAPKRPTSKDRHTKVEGRGRRIRMPAGCAARVFQLTRELGHKSDGETIRWLLERAEPAIIEATGTGTVPAIAVSVNGTLKIPTSSPVLNDGGRDGDGDLIKKRRKRNCTSDFVDVNDSCHSSVTSGLAPITASNYGVNILNVNTQGFVPFWPMGMGTAFVTGGPDQMGQMWAIPTVATAPFLNVGARPVSSYVSNASDAEAEMETSGGGTTQPLRDFSLEIYDKRELQFLGGSGNSSPSSCHET*
AtTCP20	AT3G27010.1	MDPKNLNRHQVPNFLNPPPPPRNQGLVDDDAASAVVSDENRKPTTEIKDFQIVVSASDKEPNKKSQNQNQLGPKRSSNKDRHTKVEGRGRRIRMPALCAARIFQLTRELGHKSDGETIQWLLQQAEPSIIAATGSGTIPASALASSAATSNHHQGGSLTAGLMISHDLDGGSSSSGRPLNWGIGGGEGVSRSSLPTGLWPNVAGFGSGVPTTGLMSEGAGYRIGFPGFDFPGVGHMSFASILGGNHNQMPGLELGLSQEGNVGVLNPQSFTQIYQQMGQAQAQAQGRVLHHMHHNHEEHQQESGEKDDSQGSGR*
ArTCP21	AT5G08330.1	MADNDGAVSNGIIVEQTSNKGPLNAVKKPPSKDRHSKVDGRGRRIRMPIICAARVFQLTRELGHKSDGQTIEWLLRQAEPSIIAATGTGTTPASFSTASLSTSSPFTLGKRVVRAEEGESGGGGGGGLTVGHTMGTSLMGGGGSGGFWAVPARPDFGQVWSFATGAPPEMVFAQQQQPATLFVRHQQQQQASAAAAAAMGEASAARVGNYLPGHHLNLLASLSGGANGSGRREDDHEPR*
AtTCP22	AT1G72010.1	MNQNSSVAEATLQLNSGEKPSPGSIPFISSGQHGNISTSATSSTSTSSGSALAVVKSAVKKPTKDRHTKVDGRGRRIRMPAMCAARVFQLTRELGHKSDGETIEWLLQQAEPAIIASTGTGTIPANFSTLNASLRSGGGSTLFSQASKSSSSPLSFHSTGMSLYEDNNGTNGSSVDPSRKLLNSAANAAVFGFHHQMYPPIMSTERNPNTLVKPYREDYFKEPSSAAEPSESSQKASQFQEQELAQGRGTANVVPQPMWAVAPGTTNGGSAFWMLPMSGSGGREQMQQQPGHQMWAFNPGNYPVGTGRVVTAPMGSMMLGGQQLGLGVAEGNMAAAMRGSRGDGLAMTLDQHQHQLQHQEPNQSQASENGGDDKK*
AtTCP23	AT1G35560.1	MESHNNNQSNNNTTGSAHLVPSMGPISGSVSLTTTAPNSTTTTVTAAKTPAKRPSKDRHIKVDGRGRRIRMPAICAARVFQLTRELQHKSDGETIEWLLQQAEPAIIAATGTGTIPANISTLNISLRSSGSTLSAPLSKSFHMGRAAQNAAVFGFQQQLYHPHHITTDSSSSSLPKTFREEDLFKDPNFLDQEPGSRSPKPGSEAPDQDPGSTRSRTQNMIPPMWALAPTPASTNGGSAFWMLPVGGGGGPANVQDPSQHMWAFNPGHYPGRIGSVQLGSMLVGGQQLGLGVAENNNLGLFSGGGGDGGRVGLGMSLEQKPQHQVSDHATRDQNPTIDGSP*
AtTCP24	AT1G30210.1	MEVDEDIELQKHQEQQSRKLQRFSEDNTGLMRNWNNPSSRIIRVSRASGGKDRHSKVLTSKGLRDRRIRLSVATAIQFYDLQDRLGFDQPSKAVEWLINAASDSITDLPLLNTNFDHLDQNQNQTKSACSSGTSESSLLSLSRTEIRGKARERARERTAKDRDKDLQNAHSSFTQLLTGGFDQQPSNRNWTGGSDCFNPVQLQIPNSSSQEPMNHPFSFVPDYNFGISSSSSAINGGYSSRGTLQSNSQSLFLNNNNNITQRSSISSSSSSSSPMDSQSISFFMATPPPLDHHNHQLPETFDGRLYLYYGEGNRSSDDKAKERR*
Gene ID	Gene name	Protein sequence
LOC_Os01g11550	OsTCP1	MGDAGGHSHHHQHGFQPQLLSFGGVGHHHHLHQFTAQPQPPAASHTRGRGGGGEIVPATTTPRSRGGGGGGGGEIVAVQGGHIVRSTGRKDRHSKVCTARGPRDRRVRLSAHTAIQFYDVQDRLGYDRPSKAVDWLIKNAKDAIDKLDVLPAWQPTAGGAGAGNAAAPPSSSTHPDSAENSDDQAQAITVAHTAFDFAGGGSGGTSFLPPSLDSDAIADTIKSFFPMGGTAGGEASSSTTAAQSSAMGFQSYTPDLLSRTGSQSQELRLSLQSLPDPMFHHQQHRHGGGGGGGNGTTQQALFSGAANYSFGGGAMWATEQQAQNQRMLPWNVPDPGGGGGAAYLFNVSQQAAHMQAAAAALGGHQSQFFFQRGPLQSSNQPSERGWPETVEADNQMSHH…
LOC_Os01g55750	OsTCP2	MILGSNQAAAAAAAAAAAEEEAAELARKHTAAVATSRQWSAQTESRIVRVSRVFGGKDRHSKVKTVKGLRDRRVRLSVPTAIQLYDLQDRLGLNQPSKVVDWLLNAARHEIDKLPPLQFPPQDHLCMGHHHHLPSAMPLMHHHGHHHHADDDKYHVAAAAAALAAEKEAAAAGGGGGGGGDDVDGGGGGGAAHIVGRFPAGGYHRFMGLNNPLGMVNSAAGAAMPFHYAGESWNNGSVQDSGAGSPQVAAAAAHHTSPFPSLLSLAPGPHHQLVFYSSEAEQFTVDNLGSQGLSLSSARAFHDQTGS*
LOC_Os01g69980	OsTCP3	MDPKFPPPPPLNKTEPTTTTTNQQHHHDEQQQQHRLQIQVHPQQQEQQDGGGGGGKDQQQQQQMQVVVAAAAGERRMQGLGPKRSSNKDRHTKVDGRGRRIRMPALCAARIFQLTRELGHKSDGETVQWLLQQAEPAIVAATGTGTIPASALASVAPSLPSPNSALSRSHHHHHHMWAAAPPTASAGFAGAGFSGADSGVIGGIMQRMGIPAGIELQGGGAGGLGGGGGGGGGHIGFAPMFASHAAAAAAMPGLELGLSQDGHIGVLAAQSLSQFYHQVVV*
LOC_Os02g42380	OsTCP4	MSSRDAAATFHVYQPVQIPTATVAPAAAVSAAPAEAVAQLVPAPSKKAAGAAGGKDRHSKVNGRGRRVRMPIVCAARVFQLTRELGLKSDGQTIEWLLRQAEPSILAATGTGTTPAAFVSSSAPSTSSSHQHTLLGKRQRQESAAADAVSVAGAASAFWAALPAPGRPDAWGFSPLDAQPTYVPMAQAHHHHLNLLAALSGAARRAEEESR*
LOC_OS02g51280	OsTCP5	MTMDVAGDAGGGRRPNFPLQLLEKKEEQPCSSSAAGGGTGPSSAGGNGNNGSGPGGAGGEMQLRKAAPKRSSTKDRHTKVEGRGRRIRMPALCAARVFQLTRELGHKTDGETIEWLLQQAEPAVIAATGTGTIPANFTSLNISLRSSGSSLSAPAHLRALPSPAAAARFGSRADAWDRVVSLGFPSEGPASSSSSPSPLLLNFHSGSVGLDVQPSPSAAAAAADLSRKRRWEQEMQQQQQQQQQQQQQQQQQYQQQMAGYTQSQMPGTVWMVPSNSTQGGGPSGGGGGGGGGSGESIWTFPQMSSAAAAAAVYRGSVPSGLHFMNFPAPMALLPGQQLGLGPVGGGGGGGGGGEGHMGILAALNAYRTQAATDAAGQQGGGGGGGGSSQQQHGGGGGGG…
LOC_OS02g51310	OsTCP6	MRQRRHGRRGGKAAAGARGAKAASIKIEQTKPRRISQELAQASAMEEVVVGKERKRPRCALVGVGGHDSDVADEPGGVRARRTSTARLSVPTSIAFYDIQDRLGVNRPSKSIEWLICAALVARLLLRPPQRRPAPHPRRPSSGQPSEEQARTRKATVAVSPGKSGEKRRKTRSGCAARKAERIAKLRVWREGWMPRREASTSATSGGQSWIRKPSTPGSGDSCSCSDAKPGKRRWAEKAGEVVAREADGAERGGGGRRR*
LOC_Os03g49880	OsTCP7	MLPFFDSPSPMDIPLYQQLQLTPPSPKPDHHHHHHSTFFYYHHHPPPSPSFPSFPSPAAATIASPSPAMHPFMDLELEPHGQQLAAAEEDGAGGQGVDAGVPFGVDGAAAAAAARKDRHSKISTAGGMRDRRMRLSLDVARKFFALQDMLGFDKASKTVQWLLNMSKAAIREIMSDDASSVCEEDGSSSLSVDGKQQQHSNPADRGGGAGDHKGAAHGHSDGKKPAKPRRAAANPKPPRRLANAHPVPDKESRAKARERARERTKEKNRMRWVTLASAISVEAATAAAAAGEDKSPTSPSNNLNHSSSTNLVSTELEDGSSSTRHNGVGVSGGRMQEISAASEASDVIMAFANGGAYGDSGSYYLQQQHQQDQWELGGVVYANSRHYC*
LOC_Os03g57190	OsTCP8	MEAAVGDGEGGGGGGGRGKRGRGGGGGEMVEAVWGQTGSTASRIYRVRATGGKDRHSKVYTAKGIRDRRVRLSVATAIQFYDLQDRLGFDQPSKAIEWLINAASPAIDTLPSLDPAAFAAIPHAAADAAPTRRRSQQQQQQLSNKSGCSSTSETSKGSDKEVTVASAPAQAASFTELLIAGVAASSAGGGAIGNGADCVGIAHPGKGGAEGASTYGFSAASSFGDAPPIGMVPAPPFNFSAPGADMAAHYSLAQDQLAAPPPPAGGDYNLNFSMSSGFLGANRGTLQSNSPSNMSGHHHHHHQQQLQRLDGSTISFLLGHAAAAAHPAASEGQITSTAALQLWDGFRHSGMKEKSKN*
LOC_OS04g11830	OsTCP9	MMASSSDLILYNLVPAQPLNPSAIPNPNPDLSIAAAEPPSSDGATPRRVRPRKSPSSSDRHSKVAGRGRRVRIPAMVAARVFQLTRELGHRTDGETIEWLLRQAEPSIIAATGTGVTPEEAPPAAVAIGSSSVAAAAAAGGHGGAFVHVPYYTALLMQPPNADEPPMASAASASGTTAADENNN*
LOC_Os04g44440	OsTCP10	MASRDAATFQVYRPMAMPTPAALPPSSQQITMPFTAALVDAVLPAPRKAAATQGGKDRHSKVNGRGRRVRMPIVCAARVFQLTRELGLKSDGQTIEWLLRQAEPSILAATGSGTTPAVFSCSSAPSTASSSFLLGKRPRQEDHEAPTFWEALQQQPRPAVSSWGALVSPSQEAQAYASSVAQVHHLNLLSALSGAATRRPAQEESR*
LOC_Os05g43760	OsTCP11	MTSNNSTNEELGGGGRKAADKPSGGGGAAAAVASSRHWSASTESRIVRVSRVFGGKDRHSKVRTVKGLRDRRVRLSVPTAIQLYDLQDRLGLSQPSKVVDWLINAAQAEIDKLPPLQFPPHDHDLVAAAASSMAPPPFANGGDGHHGASASSMLEDGDKAAGGGGMKAFMSLSNSLGLLNAATMPATLAAHHHHHHHAAAYYAAAESWGNGGNGGHHHDVSHGVSPSAHNSPFPSLLSLAPGSHHQFVFYSPEGGGFAVKEAAAEQFPVDSLDHSQGQLTLSSARSFLHSGSQG*
LOC_Os06g12230	OsTCP12	MDVTGDGGGGGQRPNFPLQLLGKKEEQTCSTSQTAGAGGGGVVGANGSAAAAPPKRTSTKDRHTKVDGRGRRIRMPAICAARVFQLTRELGHKTDGETIEWLLQQAEPAVIAATGTGTIPANFTSLNISLRSSGSSLSIPSHLRLAGLAGPRFGGGARAADAWDRVVGLGFGGAADAPSSATSSSSSPLLLSFHSGSVGLDVSPPSASTSPAAADLSRKRRWEQEMQQQQQYQQQMAGYTQSQIPAGTVWMVPSSNAQAAGGGAPPGGGGESIWTFPQSGSGGGGGAATVYRGVPSGLHFMNFPATPMALLPGGQQLGLAGAGGGGEGHPGILAALNAYRAQAAQPDAGAAAQNGAQGSSQHRQHQHHGGGGGGGDERHESMSASDS*
LOC_Os07g04510	OsTCP13	MLLPPPSSPSPVPEHKPPLLGVDGFLIQLWPPDAAEVLASRLGIHPSLRALNFAMRSALRAAHLDLVFRLFSPDFLGDAAIVAFLVRACSVEGRLLDGLRLRRVRSWAALGRTKEQSSDGSASMAAAAARMSHSMALLGWSTPRRSWMS*
LOC_OS07g05720	OsTCP14	MELAGSNNKRGRVRGPNDDDDDAGEPDAKRHHHQLLLPWPQQQQQQHPASRIYRVSRASGGKDRHSKVYTAKGIRDRRVRLSVSTAIQFYDLQDRLGYDQPSKAIEWLIKAAAAAIDKLPSLDTASFPTNPASSAAVAAAAAPPLPHAEREQQQQLTKSGCSSTSETSKGSVLSLSRSESRVKARERARERSSAAAAAASKDAGDDAATPTAPTAAPASSQAASFTELLTGMAAANASPADHKQQQAWQPMTVAAATADYIGFAAAAAPHTQPRKSAAGHHSAMPHTFASPAPHLANITPIAMAPAQHFTLTPAAAEHHAEMTHYSFDHFMPVHAAAAAAAAASTPAGGDYNLNFSMSSGLVGVHSRGTLQSNSQSHLSSHHHHHHQQQQQQQQLQRLS…
LOC_Os08g33530	OsTCP15	MSAPSSSSSPSTLDEYDARFFFPGADAYTAGHRQDEETLEAVLRQPVTTTAAAAAAVEGGGGGGGGGAGGSPAAAAAATRRRPFRTDRHSKIRTAQGVRDRRMRLSVGVARDFFALQDKLGFDKASRTVEWLLTQSKHAINRLTLPDSADAAAAPAFAAAPPPADQHSSAMAAAAASAAKEKGEASSSSTTNASSARARNRDHDGSSPVAPMDERGRRGVELDWTAAAAASTEQPMDGLEYYFQYYNHLEEIMSCDPTTTTDE*
LOC_Os08g43160	OsTCP16	MEAQAQDKAEEGEEEGTRQQHAQAGPVGAAGGGGGGGAAAVAMSAIPMNSWLVPKPEPVEFFGGMAMVRKPPPRNRDRHTKVEGRGRRIRMPAACAARIFQLTRELGHKSDGETIRWLLQQSEPAIIAATGTGTVPAIATTVDGVLRIPTQSSSSSGPASSAVVDGEESSAKRRRKLQPTRAVAGASPLATAAPAAYYPVIADPLLQGSGGAAISVPSGLAPITATGAPQGLVPVFAVPATGSPAVAGGNRMIPQATAVWMVPQPAGAAGAGNQPTQFWAIQSAPQLVNFAGAQFPTAINVADFQQQQQQQPVSTTIVQNSNSGEHMHFSGADSHEQQRRGRKEGNSGGVVDHPEEDEDDDDDEPVSDSSPEE*
LOC_OS09g24480	OsTCP17	MQQQLDQQQQQQQHQYDHFFSGHGQFNSETLEAVLCRPPRGAAADPAVPAAAAAAAVLTAARNGGGGHGRARKRPFRTDRHSKIRTAQGVRDRRMRLSLDVARDFFALQDRLGFDKASKTVDWLLTQSKPAIDRLAADPSSSSHRAAGDTRMSSAERGGDHHMVAVGAAGSGKGDADKARGPRGGRSAPMELGCELGRLVPAPVLGEYYYELAEMMSNNTGGEGDDDGDYDDDGDFLDDSGFLCHYRSKKKFSIKDIS*
LOC_Os09g34950	OsTCP18	MASQLQGKGAETAAAGERVAPGTNAAAFAGLGYPPIQSPVALQEEEGPRDAAFAGYAPIRSPVVSRLQEKGEGEGEEEEVDKREEAGMAADGSAFAAGMALVPKPEPVAVEFLRGLAVAKPPPRNRDRHVKVEGRGRRIRMPVNCAARIAQLTRELGHKSDGETIRWLMQQSEPAIVAATGTGTVPAIATTVDGVLRIPTESPSAAARGDEPAPKRRRKLQPTRAAAGGPVEALAAAPPPAVYYPIVADPLLQANGGGSISISSGLAPASSATPPTATGGGAIPFIAMPATSDGGKQAMSPATVWMVPPGGAGAVNQPIQYWAFQPNPDHANFAGASSYNVGQNPGVHEASAADHAASTGGGGGGEDDEYEGMTDSSSDEE*
LOC_Os11g07460	OsTCP19	MIKDLRTLESWAKEKPEIEQPALQAVVGGGGLRAAAAAAEGGMEQQAAPSSSTSTSTNSSRSTSDHHAAAAAAAAAAAAQVAHQHHPFYYAAAQGGANTMPAPASFMGSLAIVPAAAAPGGGGGQVQAAAAPVASSEKKAVVAAGAGAKRPTKDRHTKVEGRGRRIRMPALCAARVFQLTRELGHKTDGETIEWLLQQAEPAIVAATGTGTIPANFSSLAVSLRSAASHSSSPRAAPFHHLQQQQQHDVAAMLGFHHHHHQLLPPPPPHQHPEPTPQDPGAGEFMRKRYREADDLFKDTSRQDPVDGATGEAEQKARAAAAAAAPPPTAPSAMWAVGPNTTGATAAFWMQPAWAFPHGAGAGAAGNTVQAPLQFMSRSSFPTAMNVTMADNNNSSNNNL…
LOC_Os12g02090	OsTCP20	MAAAWRTSRVACVVAGEKDKHSKVVTSRGLRDRCVRLSVPMAIAFYDIQDRLGVDQPSKAIEWHIRAAAAAIDAFLSLDCSLVLPNAAQLLTRWRRRPSSGQPSEEQARTRKATVAASPRKSGKKRRKTRSGCAARSASRS*
LOC_Os12g07480	OsTCP21	MDHGGGGGGGGAAPSSSNIGGGSGGGGGGGGRENHPHHPFYYSGPAAAAAAAAAAQQQQQTFMGALAITPVVAEQPQGSSGGGEKKVVAPTTPAAAGAAATTTLAKRPSKDRHTKVDGRGRRIRMPALCAARVFQLTRELGHKSDGETIEWLLQQAEPAIIAATGTGTIPANFSSLNISIRSGAASASSASNPNRASPFPALALHPHHQQHDVSAMLGYHHHLLPPPQQQQESPQDPGGAGAFMRKRYREDLFKEDDDRQDPSAPKAREQQPTTPQAAAAAAAAAAMWAVAPNTAAPGGAFWMLPVSASSAAAARPTEQPMWSFAGGGGGAATVQAPLQFMSTRVNYPGSAGAGMSDTNLGMLAALNAYNRGGAGDQQPQQQPEMDQQGRNDDDDDDGD…
LOC_Os12g42190	OsTCP22	MEEVVVGGKERKRPRGALVGVGGGGASAATAAAWRTSRVARAAAGGKDRHSKVVTSRGLRDRRVRLSVPTAIAFYDIQDRLGVDQPSKAIEWLIRAAAAAIDALPSLDCSFALPAAASSPPPPAADDAEVSTSETSKSSVLSLANAPCDNGGGAFAELLHCSNTNGSKPLQQQQQATLAYYAAAQSAHMAAPMSFEVMAMPPHLAFSQEQQQHATVAAFDRGTLQSNASLWPPPPQPPPSQHPFLLQRFAAAPAEVAGLPFFLAGGVGGAAAAAPAATTNGGERRLQLWDFKEERKT
Gene ID	Gene name	Protein sequence
PGSC0003DMP400026962	StTCP1	MSLNPKLFAHGMPAPFLNELFVFASDGIEFQIDNIPRLGEVQTKGTIYLSNIRMVFVAKNPRDNFIAFDIPLLFVHGEKLNQPIFFCKNISGYVNPVIPANANEDSIIPHSFKIMFKECDCEAFIPLVFKLIGKVRRRYRRSRAKHRVDPLHEATKTPVDEMTRYAYVDPNDSTSIFLQLQPTPKSRLGCRMNQSQPTAETSI*
PGSC0003DMP400001569	StTCP2	MESKNIKSFTAAPPSAWRRQVAPPLISPKQESHDMAEKSPAPSIIKVTLPTPKPRPSVPPPPQLPPRGNDADRPTKVDGGGRRIRIPATCAARVFQLTRELGHKTDGETIQWLLERAEPSIISATGTGVTAVSINGTTKIPTTENNDTLTGKRKRCDCGNVKFIDVKQRNNHAIRENEAKLPNNMATILAPVMSIVPPQTIMPVGSMFSVPARINSSMAAPSTVWLIQQTPLIPSTRQSAAQVNCVSVRPAATFLGVPSASLIPASATNVSSSSYSFGHC*
PGSC0003DMP400006052	StTCP3	MELTDLQNNNTNSNSKQQTTTNNTTPSPPLHHQHQHQYQLLSQHHHHQQQLQQQHGRASVPFMTSISIQPSAQAPITNSASPTATSASPSTSSPTPPQQQLVDASLAIATRSDSLVDPNKKSQPQQQLAIQQTQHVQQQLQPPPKRQTKDRHTKVDGRGRRIRMPAACAARVFQLTRELGHKSDGETIEWLLQQAEPAIIAATGTGTIPANFSTLNISLRSSGSTLSAPPSKSAPHSFHSALALAAAHHTPHPFEEGFSHMLGFHHNTHLLTQNPIADSIPGGSGGGDGTGGGEGADNYLRKRYREDLFKEEGSSNQQGEASGGSSSPSNKQFKGNSSQLPNKPNSQEGVAGQSSNMLRHTNMMPATGLWAVAPPPTSGTTGSPFWMLPVTASGSGQTL…
PGSC0003DMP400006051	StTCP4	MITREVDTSDNKIPKKSSWTSFKDPRIVRVSRAFGGKDRHSKVLTVKGVRDRRVRLSVPTALQLYDLQDKLGLDQPSKVVDWLLNEAKHEIDQLPPLQMPPIRDQTGLPLTGLRKETMVVSDEDTVKLDARNLDLKDNSNNNNNSNSFSFGLYQNNHSSQSGIFKY*
PGSC0003DMP400039421	StTCP5	MDPKQPNNKNIKPTPDQIKDLQILKNDETKKQQQVAAPKRKDRHTKVEGRGRRIRMPALCAARIFQLTRELGHKSDGETIQWLLQQAEPSIFAATGTGTIPASALAAAASVSQQGISVSAGLMIESGANIAGSGSSRSSNSRTNWPMICGDFGRPHLATVGIWPAPAPVITSFGFQSSSAPSSASLGSESSNYYLQKIGFPGFDLPAATNMNPMSFTSILGGSNQQLPGLELGLSQEGHLGVLNQIYQQARMQHPQQQQQDQHQHQQQSPEDDSQGSGH*
PGSC0003DMP400055848	StTCP6	MNHQFQVSDEEDGSEEEEEEEEEVFQENGIRNLQNHYQNQQMPQSLCKKPAKWANFTVCEQELNKGTRRMKPKRAKTDVIEGHGGRIIRATGRKDRHSKVSTARGPKDRRVRLSPNTAIQFYDVQDRLGYDRPSKAIDWLIKEAKAAIDALGEFPNNFHCTKLNPKKMQYSFDQEQSPRFSQENRGVPNSENGVQHNQQEVNYDIPIQNFNLFSSSDGFKIPFLSELQSYPHGHSLNFQSLQDDTILSSGNHHHQGSFLTTTSVNHFPSVLSQNQVFSHREPLQSSFFPLMSDPLSTQLETLSYGFANDGFSGLISSASRIQGEEEQATFFSAS*
PGSC0003DMP400045299	StTCP7	MFPFGNSSNGNPILHSSFLSNQILLHQHDLPTHHHYLGAPNGHLIDSYATNNLVINKSKKPVKKDRHSKILTSQGHRDRRVRLSLGVARKFFDLQDMLGYDKPSKTLDWLFTKSKLAIEDLINDVSKKSILDTPSSINNNNNSECDEDMIVPLAAVDELTKKAKQERDSRAKARARARERTIKKIWTQIAPNREATASHYNNWNHDNVNPTIMDASTICCTSSLQVQKAWDSYHGSQI*
PGSC0003DMP400007294	StTCP8	MITREEKANESKASSSTTSWTRLKDPRIVRVSRAFGGKDRHSKVCTVRGLRDRRVRLSVPTAIQLYDLQDRLGLNQPSKVVDWLLDAAKHEIDELPPLQIPPGSLNPNLYPMLGIGGNSHQITSNKEGLNNKSINWDDNVVPLEPPNNNNNNALGYNSNFLKWDPSNLSLAHSENSLSHQHQDIHHNFNLMSSMPLGSHHQVVVYPPGLPQFFHQHNIVGPSSSSEFDPKEINFQMLSNNSGSENPMSSSTNSFRHSIDSTSQSIRPFHFLPSQNCDETEPSN*
PGSC0003DMP400007295	StTCP9	MEIKDLQIEIAEKDEAKKHQLAPKRKSNKDRHTKVEGRGRRIRMPALCAARIFQLTRELGHKSDGETIQWLLQQAEPSIIAATGNGTIPASALAAAGPSVSQQGISVSAGLQQNMDGSISNSSSRTSWPMAQLATTGIWPPSAPDVTNFGHNLGTESLQKISFPVFDLPSTNLSFTSMLGATNLPGLELGLSQDAHMNSQSLNQIYQQMGHSRMHQQQQPSPEDDNSQGSGQ*
PGSC0003DMP400007237	StTCP10	MFSASNSSTHDNPLPQYISSSFHTSSPFVGLNGNQILLHQYYQNQFSSHYLAKNNCVDSLRSFPMKKKPKKRERSCSKILTAQGPRDRRIRLSIAMARKFFDLQELLGFDKPSKTIDWLFTHSQVALEELTNWSTHQTQISGLILALTIIKYQNEPS*
PGSC0003DMP400037397	StTCP11	MASVENNQNIEQEDDEVSDSKIDPLLGDSHEYTIAAVGNVTDAEGVDPSPAPSTDMVLLLKEEPEENDLRVSTSVGMNMQLQKVEKQPVKRSSKDRHTKVEGRGRRIRMPAACAARIFQLTRELGHKSEGETIRWLLERAEPAIIAATGTGTVPAIAVSVNGTLKIPTTSPAANNEGESSTKRRKRAANSEFYEVHEASSFAPVAPIAPQGLVPVWPVGSGNGLVPTTAFTGGATFYMLPPGTNTTVGAQLWATPIFNVPGRTISNFVSAMQPGMGYAAGGVSSVAAANEVHLSSSFCVSKSDGNGDKLGNVASAMAPSSSSTGSTTTSTTQMLRDFSLEIYDKRELQFMVGSGSSENDQTSSSKS*
PGSC0003DMP400010075	StTCP12	MVNVDQNKQKVDDNGTKVLGADPLLGDSHESAIAVDLSQVVKKRAKYKHTKVEGRGTRVRLSPICAARIFQLTQELGHKSEAETLKWILEHAEPAIIAATGTGTIPTNAIQVNGMFKIPATINDGESFVRKRKRAFNSEFYDVHEKSKFAPVAPIAPKGVVPVWPVGNGYYMPPPVARPHLWASPLINVNAVGAGELKLSSSCVSKSAGNGNKLGDGVSVMAPSSTSTSLLATTTTTRRFSKETL*
PGSC0003DMP400010076	StTCP13	MVNVENKQNIEQEHDDVNQTKVLGVDPLLSDSHESAIAADSSQEAEKQVVKKSAKYKHTTVEGHGTRVRLSPICAARIFQLTRELGHKSEGETIKWILERAEPAIIAATGTGTVPAIAVQVNGTLKVPATINEGESLMRKRKRASNSEFYDMHKESKFAPVAPITPKGVVPVWPVGNGYYMLPPVAGLHLRASPLINVNAVGASEVKLSSSCVSKCAGNGNKLGDGISVMAPSSTSTSPGATTTTTRGFPLEIFNKKVHQLMNGFGSTKS*
PGSC0003DMP400010074	StTCP14	MNSSSGNNFQTKQESNDSKLSSKTTSAPSSSRQWGVNKNPRIVRVSRTFGGKDRHSKVCTIRGLRDRRIRLSVPTAIQLYDLQDRLGLSQPSKVVDWLLEATKLDIDTLPPLPVPPEYFTRFQQPPHEEYSDLQQVRSQWFNANSAPYLDHGKNKSIASNHHEESNQEDNHVFTLGNHRSSNLPAMPFNSYNYQWDDQPNSNLSLELGEGRDKMPL*
PGSC0003DMP400042638	StTCP15	MDGGGDDHLHQHHQHHHQHNHRPIATFPFQLLEKKEDEACSSSSNAAAAYTTSLAISNTDNTHTNPNNTPRSTTSTLQISASGADTSKKPPPKRTSTKDRHTKVDGRGRRIRMPALCAARVFQLTRELGHKSDGETIEWLLQQAEPSVIAATGTGTIPANFTSLNISLRSSGSSMSVPSQLRSSYFNPNFSLSQRRGLFPPGIGLSTDTSATTLLNFQSANLSPNMQLQTKPELRDNSIDLTESSPAEDNLSRKRRSDLDLEQQQHQQQQQMGSYLLQSSTGPMPTGHSSIPANFWMVTNPIPSNQVMGGDPIWPFQSVSNSGAAAALYRGTMPSGLQFMNFPTPVALLPSQQLGGGSSGGGGNNGLGEGQLGMFAGLNPYRGGGGVSESQASGSHSHH…
PGSC0003DMP400042637	StTCP16	MRLSLEIARKFFNLQDLLGFDKASKTVEWLLTKSKSAVNDLVQKISKGKCSASTNPNIGVVSSPSESCEVISGVIDESAATNNTHKQQKKKKSIRRAIFHPVVAKESRTEARARARERTKIKKSLNNNNGDQSMAPDEDLTRSLGSWSTTFEDHQSGIQAYNNTNNIMNAVDNFNLVDTSNWSPFMFNYHQINTEISQEHQLTNFQYPGKLWEA*
PGSC0003DMP400006021	StTCP17	MFPSSNNHDTFSYTSKTFLERSFTYDHQNPSSSSRQEDNPFFLNFPSPFLDHNESPLSQILPHKHQDHHVKEGNFTHLSSETSKEEMSIEAKPSSKKRSLSTTPRRRTGKKDRHSKICTAQGVRDRRVRLSLHIARKFFDLQDMLGFDKASKTIEWLFSKSNNAIKELSENTPQKEYSDGNNKIVINSNNTSSSEGKSDSFMSESEENSINELGKDKEKMMQNNNPHKRESREKARARARERTKEKMMIKGLEKCNPNNMFDQLGSSRSNSGFLDQDSNNNSYNTSVNQEKGSPHEANSQSLEHHFPIQNYLGGTSTNSSTIDVGNCFMSFHGNWEINYAPMKSSNYSTTFAGNPSSIYLAQQYQTLDQEKNLSCRHHRLE*
PGSC0003DMP400066099	StTCP18	MFPKSNIIHDPFTYTTQELLKQSYNTHDQNPNSPSKVVEDEDHPFFLNNFFPSPFLDDHELPLSQIFSQKHHQKQEVSDNHDINQDNTIKDNYHSVDNSRSTLLNMKIMGDQSSNPAILSSPSSKKRKQSAKPRRRTGKKDRHSKICTAQGVRDRRMRLSLQIARKFFDLQDMLGFDKASNTIEWLFSKSKNAIKELSRNIPQENNSSDQNNDDDDHRKLRKIGSSDKPIRKKTREKMMIKLGHNKKCNQELDETNPISSTIDHKLGSNSKSLEHQFANVGIMERYLGGASYSSITSIFDYDNNGVVKGDIDISNNCFNMGILENCSMTNEVQIPFSGNNPSSIYLDNSRFHQF*
PGSC0003DMP400041960	StTCP19	MENVHHHHDHDNIGNSIQRPNFPLQLLEKRDQVDHSTICSSQVHPYNSTSLHMMTTSSSDAPCVDHNQKSKNQDKKQQAKKPTTTKDRHTKVDGRGRRIRMPATCAARVFQLTRELGHKSDGETIEWLLQQAEPAVIAATGTEGQWGMLTAAMNSYRQSGGHASGSSNQHNGGDDHQHHS*
PGSC0003DMP400059724	StTCP20	MEFRESNSKNNQDGGSNSNNNNNNNSNENNNNAISTKVVKKPSKDRHTKVDGRGRRIRMPALCAARVFQLTKELGHKSDGETIEWLLQQAEPSIIAATGTGTIPANFSTLNVSLRSSGTTISAPPSKSAPLFIHGGATTMLGFHHQIPGNSFGQDPDENFMKKRYREDTTAATTSPSSSSAKPERTGVQGHEPDQESKPGSLNPSSYIPAPAMWAVGPAAGNVGNTFWMLPGTSSTMQRIGGFELPGGGRFSPVQLGSMFLQQPQPVQQLGLGVTETNMGMLASMNAYNSSSRGSGIDLGMNLEQHHHHQNQPQGSDSGDENHKDSQ*
PGSC0003DMP400001202	StTCP21	MEEGRGGNKGDDVVMSSRISIISGRISKNNKRSSNKDRHSKINTARGPRDRRMRLSLDAARKFFRLQDLLGFDKASKTVEWLLTQSDSAIEELVAVKGNDAQVPQQTSCNTPTTTTGIGAICASNSISESCEVISGTDETSSNDKNKETTAKDEKEKKKKPVNTARRPAFEPLTKESRNQARARARERTKTKKMSQVGKSKSPAHDLNPSGSRRPANRTCEEPGTHEQHTFHHVDDSSFVVNGNWNPFTIFTSHEQYAGISNEHQLVTDLQFYGKLWES*
PGSC0003DMP400001203	StTCP22	MNTKKQETGGGDTNNSKTSSRTTISTTTCTATTPSSTCSRQSSSWAAGFKNPRIVRVSRTFGGKDRHSKVCTVKGLRDRRIRLSVPTAIQLYDLQDRLGLSQPSKVVDWLIDATKDEIDKLPPLQIPPPSLSHFFNMKDHHLDFVDTSETGFGKEKWIATNDHDHQESSNHNFFQSSNLGMLNTFNNSTNNALISHNWELPNSNLSLGPFGNYQDQYQQQNMPFPSGSHHQHQQLYFCPSSSTTSATTLSSLVPPYNSHFHQNSLTPTLQLISVPVKSSFSLNDNNKGINLQDHHQHNHKEGSGS*
PGSC0003DMP400016357	StTCP23	MEGGGGDDHHHHHNHQHHQHHQQYRPNNFPFQLLEKKEDEPCSSSSAANNINYPSLAISPSDTNTNINPNSNDLQITVASTDTAKKPVPKRTSTKDRHTKVDGRGRRIRMPALCAARVFQLTRELGHKSDGETIEWLLQQAEPAVIAATGTGTIPANFTSLNISLRSSGSSMSVPSQLRSSYFNPNFSLSQRRSLFQGIGLSSDRSATTLLNFQTGNSNPSSLHQFQAKQEMRDNSLDLSETSIEESLSRKRRHDLDLQQQQEQNEQQMGSYLLQSSSSGTMPATHSSIPANFWMLTNNNNTQVLGGDPVWTFPSVNNSAAALYRSTMSSGLHFMNFPTPVALLPTQQFGGGGGGGGGNGSTLAGEGQLGMVTGLNPYRPCSGVSESQASGSHSHHGGD…
PGSC0003DMP400046265	StTCP24	MKRATGGGEIVQVEGGHILRSIGRKDRHSKVYTAKGPRDRRVRLAAHTAIQFYDVQDRLGYDRPSKAVDWLIKKAKNAIDKLDELPPWNPNQIPSSTNEADVVVLEQQPEYQLQRELEENNQSQVNSSNSYMMQGGGGGGGGGEAQQSLGDTMKSFFPMNSGTSLMNFQNYPHEIMPRSSLQNEDLGLSLHTTFHRASTSSHHDDDHSTLFSNQNFEANYPRMASWNLLPQTFFTQNATAFTQREPLQSNFSHLINHHANWEERPLMNGLIHNQVEISNNSRHFTTDFQVPARIHGEHHEHHSSASPNAHH*
PGSC0003DMP400046264	StTCP25	MGETSRLGIRNTVGEIVEVQGGHIVRSTGRKDRHSKVCTAKGPRDRRVRLSAHTAIQFYDVQDRLGYDRPSKAVDWLIKKAKPAIDELAELPAWKPTIGSVSAAAATNTNIEQEQAQKQQEDNNFAFQQGNVSLFDNVAGPSSKRAMESNTASFLPPSLESDAIADTIKSFFPMGSSTSGNSSAMQFHSFQEPHMLSRTNSQNQDLSLSLQFQDPILLHHQNQQAQHHNQTNHREQEQVQVQAPAHFTGNTPLGFDTSGWSMHQRLGSWSDSRDTGPGGSGGAVTGPGGYLFNSPPAPALLQQLFGQNQFFSQRGPLQSSNTSSVRAWMDPSTIAIASGDPSHHHQAVLPMYPSTIPGYGFASEVGEFSGFRIPARIQGEEEEHDGISDKPSSASSDSR…
PGSC0003DMP400021916	StTCP26	MSNKEDEQYHQYDVGEVKKSSDLGGGIGKLYGWPTSRIVRVSRASGGKDRHSKVLTSKGLRDRRVRLSVNTAIQFYDLQDRLGCDQPSKVVEWLLKAAAPLIAELPPLEAFQDTLQLSDEKRSSEPRFDSADVEMDDDLNYNQQQQQQQQQPCCSNSETSKGSGLSLSRSDSRVKARERARERATEKVNTVANHHQNMHPSSSFTELLTGGMNDNNNKSSVNDDQNTPRQWSTNPLEYFTDNQIYLGNPLRPVSSPMFSITGDHRPEMQHFPFGGDLVPVVTSTNNEYNLNFSISSSSDFNRGTLQSNSSSTLPQYQRYGSYLGSTTEYDNRHSDQKGKGKK*
PGSC0003DMP400021917	StTCP27	MSSFHDPDDDCGTSELSNDVAGDLNDRKMDGDGVADEKKLVFSAMKEEPFDSDHHTLVPSMPMPVATTAAPRRSSTKDRHTKVEGRGRRIRIPATCAARIFQLTRELGHKSDGETVRWLLEHAEQSIIEATGTGTVPAIAVSVNGTLKIPTSSPASNREIDENNPQKRRRKSSNSEFIDVGSLNRNAANVSQFAPVTTTPATIPAAAAAPPPGLLPIWTMSNGGMMVPSNAIWMIPATVPPVNVTNNNNVMVQYPQLWTPVFNLATRPISSFVAAPTAAATNNISGPPPIMMAGPLTINDGAATSTGPKIGSNKSSMAPASLSSSTDRNNNNKNDKPHMLRDFSLEIYDRKELQFMSRSGNHQQEPQVTSSKRS*
PGSC0003DMP400016628	StTCP28	MGSEIVVSGAISGAGNGSVNSEANDKTALAVVPTKKRNALSVSSSKDRHTKVNGRGRRVRMPALCAARVFQLTKELGHRTDGETIEWLLRNAEPSIIAATGTGTIPATQVTTTSENIPLSQSQPSVLAPLTRATPVSGFPVGGGFFSMAPQSQPNCRLDLCQPSLEFSGNAYRHMPFTALLLQPVTADEGEEKVAGEDGKQ*
PGSC0003DMP400016629	StTCP29	MNHQLQVSNENEDKSSSQQEDDDDENKDEFFHEILQSDYQHLQQWPNYFTAPSATLVPKHQNNTQCPSHKDETKKVSLKRKPKRAKKDVMEVHGSRIVRATGRKDRHSKVSTATGPKDRRVRLSPNTAIQFYDVQDRLGYDRPSKAIDWLIKEAQRAINALEKTPFQVFSNKIDSTNKALNVRNEEGQFALEQSWSVDKKTELEELARHSTKLNATMQHSADQFPEGCYKEQSSKVCQANATQIVNSSANGSKIQSFCEFQTHPQAHFHSQTKRQSPNDAKIQSFCEYQTHPQSHFQSETKKQSPNVAKTQSFCELQTHPQAHFHSQTKKQPTNDAKIQSFWELQTHPQGHFQSETKNQSPNVAKTQSFCELQTYPQGQFHSETKRQSAKDAKIQSFCE…
PGSC0003DMP400028584	StTCP30	MEFMEPHRKKQGGSTSATNHHQHHQHNQEAPSSLQLISPHQSQPDPSTPGSNHPHGPFMGSISMQSTTLISPPSTNSPTPNNNALSTPKVVKKPSKDRHTKVDGRGRRIRMPALCAARVFQLTKELGNKSDGETIEWLLQQAEPAIIATTGTGTIPANFSTLNVSTRSSGTTISAPPSKSAPLFIHGASAAAATAMLGFHHHLSTNNTGFSQDPDENYMKKRFREDTTTSGATSPSADKPGSDSSKPGSSQPPSLIPAQAMWAVAPAGGNVGNGFWMLPVSGGTGSTTVSVGAAQSDHQLWQYKSSTIGGLEFPGGGRFSPVQLGSMVLQQSQPVQQLGSNMGMLSSMNAYNNNNSRVDLGMNLEHHHHQRQQHQDSDSGDENHNDSQS*
PGSC0003DMP400028585	StTCP31	MYQDLDKIKQQAQSKKRSYVPPLPRPKQKVGTSSRFGGGEIVEVQGGHIIRSIGRKDRHSKVCTAKGPRDRRVRLAAHTAIQFYDVQDRLGYDRPSKAVDWLIKKAKASIDELAELPPWKPTTGVTTFDQEKDVEDDDNNGHFVGTTSKSSMIMLGQNNSASSSGENANGSNFLPHSLDSDAISDTIKSFFPMGGGSTEGNSSGMQFQSFQEHNLLSTTSSQSQDLKLSLQSFQDPVLLHNHQIEQSQAQFQASNFFTGSTPLIGFDASVWPQPQTQHQQQPVELGRLAAARGAGGYTGMAFGGGAIAGANSYLFNSQPAPPLLQQLFSQNQFLSQRGPLQSSYSPSIRAWIDPSAIAIATADPIHHHQHHVLPMYSTSVSGIGFASEVGGFSGFRIPT…
Gene ID	Gene name	Protein sequence
Solyc07g062680.3.1	SlTCP1	MSEECTKCTSVIFIYFFPLGPRCMKMNHQFQVSDEEDGSEEEEEEEEEVFQENDIGNLQSHYQNQQMPQSLCKKPEKWANFTVSEQELNKGTRRMKPKRAKTDVIEGHGGRIIRATGRKDRHSKVSTAKGPKDRRVRLSPNTAIQFYDVQDRLGYDRPSKAIDWLIKEAKAAIDALGEFPNNFHSTKLNPQKMQYSFDQEQSPEFSQENRGVPNSECGVQDNQQEVNYDIPNLFSSSDGFKIPFLSDLQSHPHGHFLNFQSLQDDTVLSSGNHHQGRFFTTTSVNHFPSVLSQNQVFSHREPLQSSFFPLMSDPLSTQLETLSYGFSNDGFSGIISSASRIQGEEEQATFFTAS*
Solyc07g053410.4.1	SlTCP2	MAETSRLGIRNTVGEIVEVQGGHIVRSTGRKDRHSKVCTAKGPRDRRVRLSAHTAIQFYDVQDRLGYDRPSKAVDWLIKKAKPAIDELAELPAWKPTIGTASAAAATNTNLEQEQAQKQQEDNNFAFQQGNVSLFDNVAGPSSKRAIESNTASFLPPSLESDAIADTIKSFFPMGSSTSANSSAMQFHSFQEPHMLSRANSQNQDLSLSLQFQDPILLHHQNQQAQHHNQTNHREQEQVQGQAPAHFGGNTPLGFDTSGWSMHQRLRSWSDSREIGPGGSGGAVTGPGGYLFNSPPAPALLQQLFGQNQFFSQRGPLQSSNTSSVRAWMDPSAIAIASGDPSNHHQAALSMYPSTIPGYGFASEVGGFSGFRIPARIQGEEEEHDGISDKPSSASSDSR…
Solyc05g012840.1.1	SlTCP3	MYEDLDTIKQQQEQARSKKRSFFPPPPPRPSCSKQKGVTSSKFGCGEIVEVQGGHIIRSIGRKDRHSKVCTAKGPRDRRVRLAAHTAIQFYDVQDRLGYDRPSKAVDWLIKKAKASIDELAELPPWKPTTTGVDHALQDDIDVGTASTIMLGQNNSASSSGENVNANTKADGSFMPHSLDSDAISDTIKSFFPMGGSGSNEGNSFQSFQQHNLMSRSQDLKLSLQSFQDPQAQFEASNFFTGFDASVWPQHQQQPVELGRLAAARGDIGGGAIAGAGSYLFNSQPAPPLLQQLFTQNQFLSQRGPLQSSYSPSIRAWIDPSAIAIATADPIHQNQNHHQAVFPMYSTSLSGIGFASELGGFSGFRIPTRIQGEIEEEHDGVSDKPSSASSDSRH*
Solyc05g009900.3.1	SlTCP4	MNSSSGNNFETKQESNNDSRLASKTTSAPPSSTSRQWGANKNPRIVRVSRTFGGKDRHSKVCTIRGLRDRRIRLSVPTAIQLYDLQDRLGLSQPSKVVDWLLEATKLDIDTLPPLPVPPEYFTRFQQPSHEEFSDVRAQWLNANTSYLEHGRNKSIASNEESNQEDNMFTLGNQRSSNLPGMPFNSYNYQWDHQPNSNLSLGHFGHNHSFSSQIDDDQSHQNTSFPLSLGSSSSPFPSSSQLYFNPITTTFQPIVPSPNYITNHHPIESHDPRANMNHFNFLSSTTSHNNQLVMPTLNLISSQMKPFSLNNDPRWMSSRDDEDDDDDDDDDDNQPHEGRAI*
Solyc05g007420.2.1	SlTCP5	MITREEKGNVVNDDGNKSKACTTSTSTTSWTRLKDPRIVRVSRAFGGKDRHSKVCTVRGLRDRRVRLSVPTAIQLYDLQDRLGLNQPSKVVDWLLDAAKNEIDELPPLQIPPGSLNPNLYPMLGNAPQITTNKEGRINWDNNIPLEPPNNNALGYNPNFFKWDPSNLSLAHSENSLSHQHDHHQNFNLMSSMPLTSHHQPVVYPPGLPQFFHQHNNNINVGASSSSEFDPKEINFQMLSNNSGSENPLSTSTNSFRHSIDSTNQSIRPFHFLPSQNCDDTEPSN*
Solyc05g032780.1.1	SlTCP6	MNSRKQETGSGVDTNNSKTTSTTTATTIPSSSSSRQSSSWGGGFKNPRIVRVSRSFGGKDRHSKVCTVKGLRDRRIRLSVPTAIQLYDLQDRLGLSQPSKVVDWLIDATKDEIDKLPPLQIPPPSLSHFFSTKDHHNLDFVDTGLFGKDRWIATTNDQESSNHLIFQSSNLGMLNTFSNSWEPNSNLSLGPFGNYQDQYQQQQNMPLIPSSSHHQQQQLYFCPTSSSTTTLSSLVPPYNSHFHPNSIAPTLQLTTSPVKSSFSLQDHHQHNHKEGSGS*
Solyc11g045640.1.1	SlTCP7	MFPFGNSSNGGNPILHSSFLNNQILLHQHDLPTHHHYLAAANGHSIDSYATNNVAINNKSKKQVKKDRHTKILTSQGHRDRRVRLSIGVARKFFDLQDMLGYDKPSKTLDWLFTKSKLAIEDLINDVSKKSTPLSIHNNNNNNNSECDEDMIVPLAKKAKQERDSRAKARARARERTIKKIWTQIAPNREATASHYNNSTRNWNHDDVNPTIMSSMDASTICCTSLPIVQKAWDSYHGSQI*
Solyc11g020670.1.1	SlTCP8	MYPPSNNNCSPILSSLICQNIPSSPCMQYEHELYFQSFNHDNQYYFQQQQLVPSIDDLSPHILADSCTEIITKPSNCNHELQGMEEGRGEKKGDDDVMSSRISGRISKNNKRSSNKDRHSKINTARGPRDRRMRLSLDAARKFFRLQDLLGFDKASKTVEWLLTQSDSAIEELVAAKGNDAQVAQQTSCNTPTTTTGIGAICASNSISESCEVISGTDETSSNDKNKETAQDEEKKKRKKVVNTARRAVLEPLTKESRNQARARARERTKSKKMSQTGKSKSLANDLNPSGSRRPANKTCEEPGTHEELNFHQEKNTVDDCNFMVNGNWNPFTIFSYHEQYAGISNETCNFVESYGKARARNFEADKVPSSFCAGNSKRIKFLLHFVLTRPQQKNVSGL…
Solyc09g008030.1.1	SlTCP9	KMYPSSNYSPNISSSSSFFHINIPSPSMQYEPEFIQYFHDFQFIQPSYDQNTNIPAEEAADSDKLDKIEEDQSIIKSCNNNKKDEKSSSSTSTIRRKNNKRTTSGSAGVGPSKKDRHSKINTAHGPRDRRMRLSLEIARKFFNLQDLLGFDKASKTVEWLLTKSKSAVNDLVQKINKDKCSGSENPNIATVSSPSAESCEVIDESAATNTAETQKQQKKKVKSIRRAIIHPVVAKESRKEARARARERTIIKKSLNDNTNNNNNGDQSMADEDLTRSLRSWNTTFEDHQSGIQGYNNNNNMNVVDNFNLVDTSNWSPFMFNYHQINTEISQEHQFANFQYSGKLWEA*
Solyc04g006980.1.1	SlTCP10	MKSATGGGEIVQVEGGHILRSTGRKDRHSKVYTAKGPRDRRVRLAAHTAIQFYDVQDRLGYDRPSKAVDWLIKKAKNAIDKLDELPPWNPNQIPGNTTEADALVLKQQPEYQLQRELEENNQSRVNNSSNSYLMQGGSGGGGGGGEVQQQSLGDTMKAFFPMNLGTSLMNFQNYPHEIMPRSSLQNEDLGLSLHTTFHRASTSSHHHEDDHSTLFSNQNFEANYPRMASWNLLPQTFFNQNANNAFTQREPLQSNFSHLINHHANWEERPLMNGLIPNQVEISNNSRHFTTDFQVPA
Solyc04g009180.3.1	SlTCP11	HTFSLSLSPLKKPKIMELTDLQNNNTNSNSKQQTTTNNTTPSPPLHHQQQHQYQLLSQHHHHQQQQQLQQQHGRSSVPFMTSISIQPNAQAPITNSATNASPSTSSPTPPQPPHLVDASLAIATRSDTLVDPNKKSQLAIQQTQPVQPQQPPPKRQTKDRHTKVDGRGRRIRMPAACAARVFQLTRELGHKSDGETIEWLLQQAEPAIIAATGTGTIPANFSTLNISLRSSGSTLSAPPSKSAPHSFHSALALAAAHQTPHPFEEGFSQMLGFHHYTHLLTQNPIAESIPGGGGGGGSSGDGGGVGGQEGADNYLRKRYREDLFKEEGSSNQQGEASGGSSSPSNKQFKGNSPQLPNKPNSQEGVAGPSSNMLRHTNVIPATGLWAVAPPPTSGTTGGS…
Solyc02g094290.1.1	SlTCP12	MEFMEPHRKKLGDASNHHQHNQEETPSSLQLISPHQSQRDPSTPGSNHPHGPFMGSISMQSISPPSTNSSTPNNNTISTLKVAKKPSKDRHTKVDGRGRRIRMPALCAARVFQLTRELGHKSDGETIEWLLQQAEPAIIATTGTGTIPANFSTLNVSTRSSGTTISAPPSKSAPLFIHGASASASAAMLGFHHHLSTANTGFIQDPDENYMKKRFREDTTTSGATSPSPDKPGSDSSKPGSNLIPGQAMWAVAPAGGNVGNGFWMLPVSGGTGSTAVSVGAGQSDHQLWQYKSSRIGGLEFPGGGRFSPVQLGSMVLQQSHPVQQLGSNMGMLNAYNNNNNNSRVDLGMNLEHHNQTQHQDSDSGDENHNDSQS*
Solyc02g089020.2.1	SlTCP13	MEFRESNSKNNQDGGSNSNNNSNENNSNVISTKIVKKPSKDRHTKVDGRGRRIRMPALCAARVFQLTKELGHKSDGETIEWLLQQAEPSIIAATGTGTIPANFSTLNVSLRSSGTTISAPPSKSAPLFIHGGAATMLGFHHQIPGNSFGQDPDENFMKKRYREDTTAASTSPSSSSAKPERTGVQGHEPDQESKPGSSNPSSYIPTPAMWAVGPAAGNVGNTFWMLPGTSSTMQRIGGFELPGGGRFSPVQLGSMFLQQPQPVQQLGLGVTETNMGMLASMNAYNSSSSRGSGIDLGMNLEQHHHHQNQPQGSDSGDENHKDSQS*
Solyc02g077250.2.1	SlTCP14	MSTSAEGNGAIIDPQRQQQQAPTGVGTNGALTVKKPPVKDRHSKVDGRGRRIRMPIVCAARVFQLTRELGHKSDGQTIEWLLRQAEPSIIAATGTGTIPASFSTVSVSVRNSTASLVSSLSAPLDQKSSQMISPAPFILGKRLRSDDENIENGNKDDVAVAAGAATAVGPTAGFWAVPARPDFGQIWSFAAAPPPEMMVPTSAAAAAAAAAALSSQSSRFFQQQMGEASAARVGNYLPMTQGHLNLLASLSGPPQPSSGRRDDDGR*
Solyc02g089830.2.1	SlTCP15	YPQFLLYNWCLFFHKNQIKYYMSTSVEQNGAVLLDSTTGSGGGVANSNGALTVKKPPAKDRHSKVDGRGRRIRMPIVCAARVFQLTRELGHKSDGQTIEWLLRQAEPSIIAATGTGTIPASFSTVSVSLRNSISSVTASAPVDHKLPSPSPSLLHPLISPAPFLLGKRLRSEDDDNGSGDKDVVPSAGFWAVPARPDFGQVWSFAAPSPEISHSAAAAMNTQPSRFLQQQMEEASAGRVGNYFPIAQGHLNLLASLSGSGSGPRRDDDGQ*
Solyc02g065800.3.1	SlTCP16	MDGGGDDHLHQRHQHNHRSIATFPFQLLEKKEDEACSSSSNAAAAYTTSLAISNTDNTHTNPNNTPRSTISTLQISASGADTSKKPPPKRTSTKDRHTKVDGRGRRIRMPALCAARVFQLTRELGHKSDGETIEWLLQQAEPAVIAATGTGTIPANFTSLNISLRSSGSSMSVPSQLRSSYFNPNFSLSQRRGLFPPGIGLSTDTSATTLLNFQSANLSSNIQLQTKPELRDNSIDLTESSPAEDNLSRKRRSDLDLEQQQHQQQQQQMGSYLLQSSTGTMPTSHSSIPANFWMVTNPIPSNQVMGGDPIWPFQSVSNSGALYRGTMPSGLQFMNFPTSVALLPSQQLGGGSSGGGGGNNGLGEGQLGMFAGLNPYRGGGGVSESQASGSHSHHGGGTD…
Solyc02g068200.1.1	SlTCP17	MEGGGGDDHLHHHHHNHQHHQHHQQYRPNNFPFQLLEKKEDEPCSSSSAANNINYPSLAISPSDTNTNINPNSNDLQITVASTETAKKPAPKRTSTKDRHTKVDGRGRRIRMPALCAARVFQLTRELGHKSDGETIEWLLQQAEPAVIAATGTGTIPANFTSLNISLRSSGSSMSVPSQLRSSYFNPNFSLSQRRSLFQGIGLSSDRSATTTLLNFQTGNSNLHQFQAKQEMRDNSLDLTETSIEESLSRKRRQDLDLQQEQQQNQQQQNEQQMGSYLLQSSSSGTMPTSHSSIPANFWMLTNNNTQVLGGDPVWTFPSVNNSGAAAAALYRSTMSSGLHFMNFPTPVALLPTQQFGAGSNGSTLAGEGQLGMVTGLNPYRPCSGVSESQASGSHSHHG…
Solyc10g018710.1.1	SlTCP18	MDPKQANHNNIKPTHDQIKELQILKNDETNKVAAPKRKDRHTKVEGRGRRIRMPALCAARIFQLTRELGHKSDGETIQWLLQQAEPSIIAATGTGTIPASALAAAASVSQQGISVSAGLMIESGANIAGSGSSRSSNSRTNWPMICGNFGRPHLATAGMWPAPAPVVTSFGFQSSSAPSSASLGSDSSNYYLQKIGFPGFDLPAATSMNPMCFTSILGGSNQQLPGLELGLSQEGHLGVLNQIYQQARMQHPQQQHQQQQQSPEEDSQGSGH*
Solyc10g082063.1.1	SlTCP19	MGSEIVVSGAISGVGNGSVNSETNGKTALAVVPTKKKNALSVSSSKDRHTKVNGRGRRVRMPALCAARVFQLTKELGHRTDGETIEWLLRNAEPAIIAATGTGTVPATQVTTTSENIPLSQSQPSVLAPLTRATPVSGFPVGGGFFSMTPQSQPNCRLDLCQPSLEFSGNAYRHMPFTALLLQPVTADDGEEKVAEEDEKQ*
Solyc10g008780.1.1	SlTCP20	MSSFHDPDDDCGTSELSNGAAGDLNDQKMDGHAVADDKKLVFSAMKEEPFDSDHHTLVPSMPMPVATAAPPRRSSTKDRHTKVEGRGRRIRIPATCAARIFQLTRELGHKSDGETVRWLLEQAEQSIIEATGTGTVPAIAVSVNGTLKIPTSSPASNPEIDENHPQKRRRKSSNSEFIDVGSLNRNAANVSQFAPVTTTPATITTAPPPGFVPVWGMSNGGMMVPSNAIWMIPATVPPAQVNVTNNNNVVLQYPQLWTPVFNLATRPIPSFVTAATINTNGPPAIMIAGPLSVNNGAATTTGPKIGSNKSSMAPASLSSSTDKNNNNTNDVKPHMLRDFSLEIYDRKELQLMSRSGNHQQETQVTSSERS*
Solyc10g150112.1.1	SlTCP21	MARVENNQNIEQEDDEVNDCKIDPLLGDSHEYTIAAVGNVTDAEGVDPSPAASTDRVLLLKEEPEENDLRVSTSVGMNMQLQKVEKQPVKRSSKDRHTKVEGRGRRIRMPAACAARIFQLTRELGHKSEGETIRWLLERAEPAIIAATGTGTVPAIAVSVNGTLKIPTSNNEGESSRKRRKRAANSEFYEASNFAPVAPIAPQGLVPVWPVGSGNGLIPTTAFTGGATFYMLPPGTNTTVAATGAQLWATPILNVPYAATGVSAACVSKSDNNGGKLSTVASAMPPSSSSTQMLRDFSLEIYDKRELQFMVGSGSSEIDQTSSSKS*
Solyc08g048370.4.1	SlTCP22	MFPSSNNHDTFSYTSKTYLERSFTYDHQNPSSSSRQEDNPFFLNFPSPFLDHNESPLSQILPQDHHVKEGNLTHLSSETSKEEMSIEAKPSSKKRSLSTTPRKRTGKKDRHSKICTAQGVRDRRVRLSLHIARKFFDLQDMLGFDKASKTIEWLFSKSNNAIKDLSENTPQKEYSDGNKIVINSNNSSSYEGKSDSFMSECEENSINELGKDKEKIMQNNPHKRESREKARARARERTKEKMMIKGLEKGNPSNMFDQLGSSRSNSGFLDQDSNNNSYNTSVNQEKGSPHEANSQSLEHHFPIQNYLGGASNSSTIDVGNCFMSFHGNWEINYAPMKSTNYSTTFAGNPSSIYLAQQYQTLDQEKNLSSKHHRLE*
Solyc08g048390.3.1	SlTCP23	MHLVLIITKNQKLIKTRNNNHNKQKKPTTTKDRHTKVDGRGRRIRMPATCAARVFQLTRELGHKSDGETIEWLLQQAEPAVIAATGTGTIPANYSSLNISLRSSRHHSASNYLAHNHNNFGHVYHDRNYFNGVGLFSSENNSFFPSGNLNMLQAKEELCDDHDDNDNDNDNNTGRIKRRSEDQDLLQNNYHMSNMLQSSTYGSIPASHQIGQIPATTLYMMTNNNNNNNNNSSHHHDLNNCSMWGSSSNNNDSIENSNIRGGILNFMNFHQPILGTRGDGGGTAAEGQWGMLTAAMNSYRQSGGHASGSSNQRNEGDDHQHHS*
Solyc08g080150.1.1	SlTCP24	MEEIRTDECKFPRMSNKEDEQYQQYDVDDVGEVKKSSGLGGIVKFYGRPSSRIVRVSRASGGKDRHSKVLTSKGLRDRRVRLSVNTAIQFYDLQDRLGCDQPSKAVEWLLKAAAPSIAELPPLEAFPDTLQLSDEKKSSEQGFDSADVEMDDDLHYNQQQQPCCSNSETSKGSGLSLSRSDSRLKARERAKERATEKEKEKENKSCIVGQHHQNMHPGSSFTELLTGGMSDNNTSPNGGSIHQNTARQWSTNPLEYFTSGLLGPSATRGIDNQIYLGNPLQPLRPMFSITGEHRAELQNFPFGGDNLVPGVTSSNTSTNYNEYNLNFSISSSSSSGFNRGTLQSNSSSTLPHYQRFSPTDGSYLGSTTEYDARLHLFYGACVNLFFL*
Solyc06g069240.2.1	SlTCP25	MFPKSNIIHDPFSFTSQELLKQSYSTHDQNPNSPSKVVEDEDHPFFLNNFFPSPFLDDHELPLNQIFSQKHHQKQEASDNHDINQADPDNTIKDNHSVDNSRSTQLNTKIMGDQSSNPAISSKKRKLSAKPRRRTGKKDRHSKICTAQGVRDRRMRLSLQIARKFFDLQDMLGFDKASNTIEWLFSKSKNAIKELSRNISQESNSSDQNNDDHRKLRKIGSSDKPIRAKTREKTKEKMMIKLGHNKKGNQELDETNPMSTIDPKLGSNPKSLEHQFANVGIMERYLGGASYSSITSIFDYDNNGVIKGNIDISDNCFNMGILENCSMTNEVQIPFSGNNPSSIYLDYSRFHQF*
Solyc06g069460.3.1	SlTCP26	MFSASNSSTHDNPLPHYISSSFHTSSPFLGFTGNQILLHQYYQNQFSSHYYLAKNNEDYCDNSLRSFPMKKKSKKRERSCGKILTAQGPRDRRIRLSINMARKFFDLQELLGFDKPSKTIDWLFTHSELALEELTNWSTHQTHRPKISGFQRPWDSYHSSQV*
Solyc06g065190.1.1	SlTCP27	MKRQNTNNTMEMKDFQIGIAEKDEAKKHQLAPKRKSNKDRHTKVEGRGRRIRMPALCAARIFQLTRELGHKSDGETIQWLLQKAEPSIIAATGHGTIQASLYRRLDPLFRNRE*
Solyc06g070900.3.1	SlTCP28	MISREVDPSDNNVIMIPKKSSLSSSSSWTRFKDPRIVRVSRAFGGKDRHSKVLTVKGLRDRRVRLSVPTALQVYDLQDKLGLDQPSKVVDWLLNEAKHDIDELPPLQIRDQTGLPLTGLRKEEEETMVVSDEDRVKLDVRNL
Solyc01g008230.4.1	SlTCP29	MSNKEDEQYDVGEVKKSGDLGGGIGKLYGWPTSRIVRVSRASGGKDRHSKVLTSKGLRDRRVRLSVNTAIQFYDLQDRLGCDQPSKVVEWLLKAAAPSIAELPPLEDLQDTLQLSNEKRSSEHGFDSADVEMDDDLNYNNQQQPSCSNSETSKGSGLSLSRSDSRVKARERARERATEKVANHHRNMHPSSSFTELLTGGMSDNNNNKTSVNDDQNTPRQWSTNPLEYFTDGQIYLGNTLRPVSPPMFSITGGPFSPILPLLCLVIRGTDHILVPQLDMTTSIQIRKEKKRSNFKFHLVILNGSSLKVPKEAPIYAFLCYRLIILY*
Solyc01g103780.4.1	SlTCP30	MKHHLEVSNENEDKSSSSSQQDDDDDENKDEFFQEILQSDYQHMQQWPNYFTPPSSTLVPKKQNNTQCPSHKEETKKVSLKRKPKRAKQDVMEVHGSRIVRATGRKDRHSKVSTATGPKDRRVRLSPNTAIQFYDVQDRLGYDRPSKAIDWLIKEAQRAINALEKAPFQVFSNKINSTNKALNVRNVENEVGQFALEQSWSADKKTELEELARRSSKLNATVQYSTDQFPEGCYKEQSSKVCQANATQIVNSSANGSKIQSFCQIQTHPQAHLHSQTKRQSPNDAKIQSFCEYQTHPQSHFHSQTKKQSPNVAKTLSFCEMQTPSQGHFHSQTKNQPTNDAKIQSFCQLQTHPQSHFQSETKNQSPNVAKIQSFGELQTTPQSHFHSQTQKQSTNDAKI…
The sequences were downloaded from the published peppers.
