# Supplementary material for: Genome-Wide Analysis of the TCP Transcription Factor Gene Family in Pepper (Capsicum annuum L.)
Source: Plants (Basel). 2024 Feb 26;13(5):641. doi: 10.3390/plants13050641 (PMC10934501; doi:10.3390/plants13050641)
Supplement: Supplementary file 1 [file plants-13-00641-s001.zip › Supplementary Table S3.xlsx]

## Sheet: Sheet1
Table S3: The information of gene duplication type, Ka, Ks, and Ka/Ks ratio values of Capsicum annuumand, Arabidopsis thaliana, Oryza sativa, Solanum tuberosum, and Solanum lycopersicum.
Gene Name	Gene ID	Gene Name	Gene ID	Method	Ka	Ks	Ka/Ks	Selection pressure	Duplication Type
CaTCP4	CA.PGAv.1.6. scaffold497.97	CaTCP7	CA.PGAv.1.6. scaffold93.57	NG	0.450371	1.25846	0.357874	Purifying selection	WGD/Segmental
CaTCP10	CA.PGAv.1.6. scaffold407.118	CaTCP17	CA.PGAv.1.6.scaffold628.26	NG	0.144663	1.08577	0.133235	Purifying selection	WGD/Segmental
CaTCP15	CA.PGAv.1.6. scaffold587.77	CaTCP11	CA.PGAv.1.6. scaffold438.114	NG	0.400707	1.18223	0.33894	Purifying selection	WGD/Segmental
CaTCP19	CA.PGAv.1.6. scaffold162.24	CaTCP18	CA.PGAv.1.6. scaffold1360.1	NG	0.384086	2.59742	0.147872	Purifying selection	Tandem
CaTCP21	CA.PGAv.1.6. scaffold103.7	CaTCP20	CA.PGAv.1.6. scaffold103.8	NG	0.0858945	0.25637	0.335042	Purifying selection	Tandem
CaTCP26	CA.PGAv.1.6. scaffold184.85	CaTCP5	CA.PGAv.1.6. scaffold497.4	NG	None	None	None	None	WGD/Segmental
Gene Name	Gene ID	Gene ID	Method	Ka	Ks	Ka/Ks	Selection pressure
CaTCP27	CA.PGAv.1.6.scaffold798.44	Soltu.DM.01G042700.1	NG	0.0455935	0.360432	0.126497	Purifying selection
CaTCP1	CA.PGAv.1.6.scaffold981.52	Soltu.DM.01G032640.1	NG	0.645421	3.62226	0.178182	Purifying selection
CaTCP1	CA.PGAv.1.6.scaffold981.52	Soltu.DM.03G016530.1	NG	0.493096	2.94482	0.167445	Purifying selection
CaTCP1	CA.PGAv.1.6.scaffold981.52	Soltu.DM.08G026800.1	NG	0.14442	0.659795	0.218886	Purifying selection
CaTCP3	CA.PGAv.1.6.scaffold79.60	Soltu.DM.02G016520.1	NG	0.0835743	0.281799	0.296574	Purifying selection
CaTCP6	CA.PGAv.1.6.scaffold473.122	Soltu.DM.02G010940.1	NG	0.13348	1.01574	0.131411	Purifying selection
CaTCP4	CA.PGAv.1.6.scaffold497.97	Soltu.DM.02G030790.2	NG	0.0596859	0.238216	0.250554	Purifying selection
CaTCP5	CA.PGAv.1.6.scaffold497.4	Soltu.DM.02G029980.1	NG	0.123895	0.438476	0.282557	Purifying selection
CaTCP7	CA.PGAv.1.6.scaffold93.57	Soltu.DM.02G030790.2	NG	0.426602	1.05794	0.403237	Purifying selection
CaTCP4	CA.PGAv.1.6.scaffold497.97	Soltu.DM.02G009190.1	NG	0.372155	0.894448	0.416073	Purifying selection
CaTCP5	CA.PGAv.1.6.scaffold497.4	Soltu.DM.03G006350.1	NG	0.367494	1.13987	0.3224	Purifying selection
CaTCP4	CA.PGAv.1.6.scaffold497.97	Soltu.DM.03G029160.1	NG	0.535309	1.44619	0.370152	Purifying selection
CaTCP3	CA.PGAv.1.6.scaffold79.60	Soltu.DM.10G004690.1	NG	0.405028	1.35728	0.298411	Purifying selection
CaTCP10	CA.PGAv.1.6.scaffold407.118	Soltu.DM.03G030410.1	NG	0.0299126	0.346585	0.0863066	Purifying selection
CaTCP11	CA.PGAv.1.6.scaffold438.114	Soltu.DM.03G034300.2	NG	0.122927	0.405212	0.303365	Purifying selection
CaTCP9	CA.PGAv.1.6.scaffold1228.15	Soltu.DM.03G029160.1	NG	0.151868	0.541543	0.280435	Purifying selection
CaTCP11	CA.PGAv.1.6.scaffold438.114	Soltu.DM.05G002510.2	NG	0.576544	2.23747	0.257677	Purifying selection
CaTCP11	CA.PGAv.1.6.scaffold438.114	Soltu.DM.06G025210.1	NG	0.36071	1.16841	0.308717	Purifying selection
CaTCP10	CA.PGAv.1.6.scaffold407.118	Soltu.DM.06G026030.1	NG	0.160478	1.02163	0.15708	Purifying selection
CaTCP13	CA.PGAv.1.6.scaffold619.8	Soltu.DM.04G005640.1	NG	0.0612217	0.592549	0.103319	Purifying selection
CaTCP16	CA.PGAv.1.6.scaffold587.49	Soltu.DM.03G029160.1	NG	0.308753	0.80675	0.382712	Purifying selection
CaTCP17	CA.PGAv.1.6.scaffold628.26	Soltu.DM.03G030410.1	NG	0.134089	1.20502	0.111276	Purifying selection
CaTCP15	CA.PGAv.1.6.scaffold587.77	Soltu.DM.03G034300.2	NG	0.441102	1.24718	0.353679	Purifying selection
CaTCP17	CA.PGAv.1.6.scaffold628.26	Soltu.DM.05G005900.1	NG	0.478781	1.75047	0.273516	Purifying selection
CaTCP15	CA.PGAv.1.6.scaffold587.77	Soltu.DM.05G002510.2	NG	0.539817	NaN	NaN	Purifying selection
CaTCP14	CA.PGAv.1.6.scaffold308.67	Soltu.DM.06G020280.1	NG	0.0372748	0.548453	0.0679634	Purifying selection
CaTCP15	CA.PGAv.1.6.scaffold587.77	Soltu.DM.06G025210.1	NG	0.13394	0.345876	0.387248	Purifying selection
CaTCP16	CA.PGAv.1.6.scaffold587.49	Soltu.DM.06G025480.1	NG	0.117785	0.340412	0.346008	Purifying selection
CaTCP17	CA.PGAv.1.6.scaffold628.26	Soltu.DM.06G026030.1	NG	0.0331409	0.458789	0.0722357	Purifying selection
CaTCP14	CA.PGAv.1.6.scaffold308.67	Soltu.DM.11G012310.1	NG	0.142211	0.847232	0.167854	Purifying selection
CaTCP19	CA.PGAv.1.6.scaffold162.24	Soltu.DM.07G023850.1	NG	0.0443217	0.319172	0.138864	Purifying selection
CaTCP18	CA.PGAv.1.6.scaffold1360.1	Soltu.DM.07G020450.1	NG	0.062049	0.332798	0.186446	Purifying selection
CaTCP19	CA.PGAv.1.6.scaffold162.24	Soltu.DM.12G029960.1	NG	0.212197	1.08327	0.195885	Purifying selection
CaTCP22	CA.PGAv.1.6.scaffold282.50	Soltu.DM.01G003810.1	NG	0.174866	0.609859	0.286732	Purifying selection
CaTCP24	CA.PGAv.1.6.scaffold900.51	Soltu.DM.09G005570.1	NG	0.178299	1.30956	0.136152	Purifying selection
CaTCP26	CA.PGAv.1.6.scaffold184.85	Soltu.DM.02G029980.1	NG	0.47942	NaN	NaN	Purifying selection
CaTCP26	CA.PGAv.1.6.scaffold184.85	Soltu.DM.05G002510.2	NG	0.103115	0.297617	0.346469	Purifying selection
Gene Name	Gene ID	Gene ID	Method	Ka	Ks	Ka/Ks	Selection pressure
CaTCP27	CA.PGAv.1.6.scaffold798.44	Solyc01g103780.4.1	NG	0.0674975	0.446395	0.151206	Purifying selection
CaTCP1	CA.PGAv.1.6.scaffold981.52	Solyc08g080150.1.1	NG	0.141347	0.66847	0.211448	Purifying selection
CaTCP6	CA.PGAv.1.6.scaffold473.122	Solyc02g094290.1.1	NG	0.181059	0.552999	0.327412	Purifying selection
CaTCP4	CA.PGAv.1.6.scaffold497.97	Solyc02g089020.2.1	NG	0.108653	0.353824	0.307083	Purifying selection
CaTCP5	CA.PGAv.1.6.scaffold497.4	Solyc02g089830.2.1	NG	0.146895	0.366067	0.401279	Purifying selection
CaTCP3	CA.PGAv.1.6.scaffold79.60	Solyc02g077250.2.1	NG	0.0913541	0.30581	0.298728	Purifying selection
CaTCP6	CA.PGAv.1.6.scaffold473.122	Solyc02g068200.1.1	NG	0.143255	1.17538	0.12188	Purifying selection
CaTCP7	CA.PGAv.1.6.scaffold93.57	Solyc02g089020.2.1	NG	0.437464	1.10515	0.395842	Purifying selection
CaTCP7	CA.PGAv.1.6.scaffold93.57	Solyc02g065800.3.1	NG	0.146808	0.422321	0.347623	Purifying selection
CaTCP4	CA.PGAv.1.6.scaffold497.97	Solyc02g065800.3.1	NG	0.269474	1.19049	0.226355	Purifying selection
CaTCP5	CA.PGAv.1.6.scaffold497.4	Solyc03g045030.2.1	NG	0.450227	1.22334	0.368031	Purifying selection
CaTCP4	CA.PGAv.1.6.scaffold497.97	Solyc03g115010.3.1	NG	0.536769	NaN	NaN	Purifying selection
CaTCP7	CA.PGAv.1.6.scaffold93.57	Solyc03g115010.3.1	NG	0.634589	2.5335	0.25048	Purifying selection
CaTCP3	CA.PGAv.1.6.scaffold79.60	Solyc10g008780.1.1	NG	0.422984	1.2476	0.339039	Purifying selection
CaTCP10	CA.PGAv.1.6.scaffold407.118	Solyc03g116320.3.1	NG	0.0372187	0.374114	0.0994848	Purifying selection
CaTCP11	CA.PGAv.1.6.scaffold438.114	Solyc03g119770.4.1	NG	0.144671	0.402791	0.359171	Purifying selection
CaTCP9	CA.PGAv.1.6.scaffold1228.15	Solyc03g115010.3.1	NG	0.175994	0.644205	0.273196	Purifying selection
CaTCP11	CA.PGAv.1.6.scaffold438.114	Solyc04g006980.1.1	NG	0.611061	NaN	NaN	Purifying selection
CaTCP11	CA.PGAv.1.6.scaffold438.114	Solyc05g009900.3.1	NG	0.529172	2.89178	0.182992	Purifying selection
CaTCP10	CA.PGAv.1.6.scaffold407.118	Solyc05g007420.2.1	NG	0.401998	NaN	NaN	Purifying selection
CaTCP11	CA.PGAv.1.6.scaffold438.114	Solyc06g069240.2.1	NG	0.421634	1.75284	0.240544	Purifying selection
CaTCP10	CA.PGAv.1.6.scaffold407.118	Solyc06g070900.3.1	NG	0.160839	1.1507	0.139775	Purifying selection
CaTCP13	CA.PGAv.1.6.scaffold619.8	Solyc04g009180.3.1	NG	0.0706404	0.624809	0.113059	Purifying selection
CaTCP16	CA.PGAv.1.6.scaffold587.49	Solyc03g115010.3.1	NG	0.3054	1.16701	0.261694	Purifying selection
CaTCP17	CA.PGAv.1.6.scaffold628.26	Solyc03g116320.3.1	NG	0.150585	1.22368	0.123059	Purifying selection
CaTCP15	CA.PGAv.1.6.scaffold587.77	Solyc03g119770.4.1	NG	0.417049	1.18566	0.351745	Purifying selection
CaTCP15	CA.PGAv.1.6.scaffold587.77	Solyc05g009900.3.1	NG	0.563393	NaN	NaN	Purifying selection
CaTCP17	CA.PGAv.1.6.scaffold628.26	Solyc05g007420.2.1	NG	0.432978	1.59914	0.270757	Purifying selection
CaTCP15	CA.PGAv.1.6.scaffold587.77	Solyc06g069240.2.1	NG	0.152439	0.402647	0.378592	Purifying selection
CaTCP16	CA.PGAv.1.6.scaffold587.49	Solyc06g069460.3.1	NG	0.154974	0.487531	0.317875	Purifying selection
CaTCP17	CA.PGAv.1.6.scaffold628.26	Solyc06g070900.3.1	NG	0.0264381	0.421379	0.0627418	Purifying selection
CaTCP14	CA.PGAv.1.6.scaffold308.67	Solyc06g065190.1.1	NG	0.0466901	0.560272	0.0833347	Purifying selection
CaTCP18	CA.PGAv.1.6.scaffold1360.1	Solyc02g077250.2.1	NG	0.559519	1.74562	0.320528	Purifying selection
CaTCP19	CA.PGAv.1.6.scaffold162.24	Solyc07g062680.3.1	NG	0.0541204	0.374343	0.144574	Purifying selection
CaTCP18	CA.PGAv.1.6.scaffold1360.1	Solyc07g053410.4.1	NG	0.0872187	0.386128	0.22588	Purifying selection
CaTCP19	CA.PGAv.1.6.scaffold162.24	Solyc12g014140.3.1	NG	0.204792	1.3806	0.148336	Purifying selection
CaTCP22	CA.PGAv.1.6.scaffold282.50	Solyc01g008230.4.1	NG	0.154356	0.596734	0.258669	Purifying selection
CaTCP24	CA.PGAv.1.6.scaffold900.51	Solyc09g008030.1.1	NG	0.198472	1.65658	0.119808	Purifying selection
CaTCP25	CA.PGAv.1.6.scaffold58.46	Solyc05g007420.2.1	NG	0.125827	0.369529	0.340507	Purifying selection
CaTCP26	CA.PGAv.1.6.scaffold184.85	Solyc05g009900.3.1	NG	0.0961737	0.254576	0.37778	Purifying selection
Gene Name	Gene ID	Gene ID	Method	Ka	Ks	Ka/Ks	Selection pressure
CaTCP14	CA.PGAv.1.6.scaffold308.67	AT1G35560.1	NG	0.322269	2.82992	0.113879	Purifying selection
CaTCP19	CA.PGAv.1.6.scaffold162.24	AT1G53230.1	NG	0.328108	3.20697	0.102311	Purifying selection
CaTCP6	CA.PGAv.1.6.scaffold473.122	AT3G27010.1	NG	0.355736	1.75962	0.202167	Purifying selection
CaTCP2	CA.PGAv.1.6.scaffold1525.3	AT3G27010.1	NG	0.321984	1.63233	0.197254	Purifying selection
CaTCP11	CA.PGAv.1.6.scaffold438.114	AT3G18550.1	NG	0.619331	3.06937	0.201778	Purifying selection
CaTCP10	CA.PGAv.1.6.scaffold407.118	AT3G47620.1	NG	0.347557	4.88413	0.0711606	Purifying selection
CaTCP6	CA.PGAv.1.6.scaffold473.122	AT5G41030.1	NG	0.468118	4.49777	0.104078	Purifying selection
CaTCP9	CA.PGAv.1.6.scaffold1228.15	AT5G60970.1	NG	0.480912	3.18746	0.150876	Purifying selection
MCScanX were used to infer the gene duplication types, Ka/Ks for the gene pairs calculated using Tbtools.
NG: NG referred to the method Nei, M., & Gojobori, T. (1986). Simple methods for estimating the numbers of synonymous and nonsynonymous nucleotide substitutions. Molecular biology and evolution, 3(5), 418-426.
WGD: Whole-genome duplication.
Nan: No calculation results are available.
