# Supplementary material for: Genome-Wide Analysis of the TCP Transcription Factor Gene Family in Pepper (Capsicum annuum L.)
Source: Plants (Basel). 2024 Feb 26;13(5):641. doi: 10.3390/plants13050641 (PMC10934501; doi:10.3390/plants13050641)
Supplement: Supplementary file 1 [file plants-13-00641-s001.zip › Supplementary Table S4.xlsx]

## Sheet: Sheet1
Table S4: The information of identified 20 motifs in CaTCP proteins
Motif name	Motif regular expression	width	E-value
MOTIF 1	R[DG]RR[IV]R[LM][SP][AV]L[CT]A[AI]	13	4.3e-184
MOTIF 2	LGH[DK][SQ][PD][SG][KE]T[IV][ED]WL	13	1.7e-174
MOTIF 3	[KR]TGGKDRH[ST]KV[CD][TG]	13	3.8e-150
MOTIF 4	[AS][IV]IAATGTGT[IV]PA	13	3.5e-78
MOTIF 5	R[VI]FQLTRE	8	1.2e-48
MOTIF 6	[QK][FL][YF]D[LV]QD[RM]	8	1e-44
MOTIF 7	[LI][KN][KAE][AS]K[HP][AS]ID[EK]L[PA][PE]	13	1.9e-24
MOTIF 8	KAR[AE]RARER[TA][KT][EI]K	13	5.2e-21
MOTIF 9	[TY][GR]F[KP][DNS][PS]RIVRVSR	13	1e-13
MOTIF 10	L[QR]QAEP	6	1e-11
MOTIF 11	NF[STY][TSN][LV][NS][IFV]S[LV][RS]SS	12	6.9e-08
MOTIF 12	[HY]H[QH][HQ][QDH][HQ]Q[HNQ][QH][HQ]Q	11	1e-07
MOTIF 13	[GM][ED][IV][VI][EQ]V[QEH]GG[HR]I[ILV]R	13	1.3e-05
MOTIF 14	E[GT][QN][LMW]GM[LFV][AT][AGS][LAM][NM][PANV][YN]	13	0.00021
MOTIF 15	F[PQM][LRK][ILK][ERS][KNY]KED[EKT][AQP][CYG]	12	0.0018
MOTIF 16	DT[IM]KSFFPM	9	0.0028
MOTIF 17	YDA[GR]L[HQ]LFYGNGY	13	0.26
MOTIF 18	MLRDFSLEIYD[KR]K	13	0.38
MOTIF 19	VVAHHQNMHP	10	0.91
MOTIF 20	F[ML]NF[PH][STQ][PL][FVI]	8	1.7
Multiple Em for Motif Elucidation (MEME) soft was used to infer conserved motif, The parameters of MEME were as follows: the motif width was range from 6 to 13, and the maximum number of motifs were 20.
The first column is the predicted motif name, the second column is the regular expression of the predicted motif, the third column and the fourth column represent the length and e-value of the motif, respectively.
