# Supplementary material for: Genome-Wide Analysis of the TCP Transcription Factor Gene Family in Pepper (Capsicum annuum L.)
Source: Plants (Basel). 2024 Feb 26;13(5):641. doi: 10.3390/plants13050641 (PMC10934501; doi:10.3390/plants13050641)
Supplement: Supplementary file 1 [file plants-13-00641-s001.zip › Supplementary Table S5.xlsx]

## Sheet: Sheet1
Table S5：Distribution information of motifs detected in the CaTCPs.										1	2	3	4	5	6	7
Gene ID	Motif1	Motif2	Motif3	Motif4	Motif5	Motif6	Motif7	Motif8	Motif9	Motif10	Motif11	Motif12	Motif13	Motif14	Motif15	Motif16	Motif17	Motif18	Motif19	Motif20
CaTCP1	yes	yes	yes	yes	yes	-	-	-	-	-	-	-	-	-	-	-	-	yes	-	-
CaTCP2	yes	yes	yes	yes	yes	-	-	-	-	yes	-	yes	-	-	-	-	-	-	-	-
CaTCP3	yes	yes	yes	-	yes	yes	yes	-	-	-	-	yes	yes	-	-	-	-	-	-	-
CaTCP4	yes	yes	yes	-	-	yes	yes	-	yes	-	-	yes	-	-	-	-	-	-	-	-
CaTCP5	yes	yes	yes	-	-	yes	yes	yes	-	-	-	-	-	-	-	-	-	-	-	-
CaTCP6	yes	yes	yes	yes	yes	-	-	-	-	yes	-	yes	-	-	-	-	-	-	-	-
CaTCP7	yes	yes	yes	-	-	yes	yes	-	yes	-	-	-	-	-	-	-	-	-	-	-
CaTCP8	yes	yes	yes	yes	yes	-	-	-	-	yes	-	-	-	-	-	-	-	yes	-	-
CaTCP9	yes	yes	yes	-	-	yes	yes	-	yes	-	-	-	-	-	-	-	-	-	-	-
CaTCP10	yes	yes	yes	yes	yes	-	-	-	-	yes	yes	yes	-	yes	yes	-	-	-	-	yes
CaTCP11	yes	yes	yes	-	-	yes	yes	yes	-	-	-	-	-	-	-	-	-	-	-	-
CaTCP12	yes	yes	yes	-	-	yes	-	yes	-	-	-	-	-	-	-	-	-	-	-	yes
CaTCP13	yes	yes	yes	yes	yes	-	-	-	-	yes	yes	-	-	-	-	-	-	-	-	-
CaTCP14	yes	yes	yes	yes	yes	-	-	-	-	yes	yes	yes	-	yes	yes	-	-	-	-	-
CaTCP15	yes	yes	yes	-	yes	yes	yes	yes	-	-	-	yes	-	-	-	-	-	-	-	-
CaTCP16	yes	yes	yes	-	-	yes	yes	-	yes	-	-	-	-	-	-	-	-	-	-	-
CaTCP17	yes	yes	yes	yes	yes	-	-	-	-	yes	yes	yes	-	yes	yes	-	-	-	-	yes
CaTCP18	yes	yes	yes	-	-	yes	yes	-	-	-	-	-	yes	-	-	yes	-	-	-	-
CaTCP19	yes	yes	yes	-	-	yes	yes	-	-	-	-	-	yes	-	-	yes	-	-	-	-
CaTCP20	yes	yes	yes	-	-	yes	yes	yes	yes	-	yes	yes	-	-	yes	-	yes	-	yes	-
CaTCP21	yes	yes	yes	-	-	yes	yes	yes	yes	-	yes	-	-	-	yes	-	yes	-	yes	-
CaTCP22	yes	yes	yes	yes	yes	-	-	-	-	yes	yes	-	-	-	-	-	-	-	-	-
CaTCP23	yes	yes	yes	-	-	yes	yes	-	-	-	-	-	yes	-	-	yes	-	-	-	-
CaTCP24	yes	yes	yes	yes	yes	-	-	-	-	yes	-	-	-	-	-	-	-	-	-	-
CaTCP25	yes	yes	yes	yes	yes	-	-	-	-	yes	yes	-	-	yes	-	-	-	-	-	yes
CaTCP26	yes	yes	yes	-	-	yes	yes	-	-	-	-	-	-	-	-	-	-	-	-	yes
CaTCP27	yes	yes	yes	yes	yes	-	-	-	-	yes	yes	yes	-	yes	-	-	-	-	-	-
The information was extracted based on the results generated by MEME, yes: the motif is present within this gene, “-“: The motif is not present within this gene.
