# Supplementary material for: Genome-Wide Analysis of the TCP Transcription Factor Gene Family in Pepper (Capsicum annuum L.)
Source: Plants (Basel). 2024 Feb 26;13(5):641. doi: 10.3390/plants13050641 (PMC10934501; doi:10.3390/plants13050641)
Supplement: Supplementary file 1 [file plants-13-00641-s001.zip › Supplementary Table S6.xlsx]

## Sheet: Sheet1
Table S6: Information of predicted miRNA targeting CaTCP genes And statistical analysis of binding sites between miRNA and each CaTCP member
miRNA_ID	CaTCP1	CaTCP2	CaTCP3	CaTCP4	CaTCP5	CaTCP7	CaTCP9	CaTCP12	CaTCP13	CaTCP15	CaTCP16	CaTCP18	CaTCP19	CaTCP20	CaTCP21	CaTCP22	CaTCP23	CaTCP25	CaTCP26	Sum
can-miR156g	0	0	0	0	0	0	0	0	0	0	1	0	0	0	1	0	0	0	0	2
can-miR159a	0	0	0	0	0	0	0	0	0	0	0	0	1	1	1	0	1	0	1	5
can-miR159b	0	0	0	0	0	0	0	0	0	0	0	0	1	1	1	0	1	0	1	5
can-miR159c-3p.1	0	0	0	0	0	0	0	0	0	0	0	0	1	1	1	0	1	0	1	5
can-miR164a-5p	0	0	0	0	0	0	0	0	0	0	0	1	0	0	0	0	0	0	0	1
can-miR164c	0	0	1	0	0	0	0	0	0	0	0	0	0	0	0	0	0	0	0	1
can-miR164d	0	0	1	0	0	0	0	0	0	0	0	0	0	0	0	0	0	0	0	1
can-miR167a-5p	0	0	0	0	0	0	0	0	0	0	0	0	0	0	0	0	0	1	0	1
can-miR167b-5p	0	0	0	0	0	0	0	0	0	0	0	0	0	0	0	0	0	1	0	1
can-miR167c-5p	0	0	0	0	0	0	0	0	0	0	0	0	0	0	0	0	0	1	0	1
can-miR167d-5p	0	0	0	0	0	0	0	0	0	0	0	0	0	0	0	0	0	1	0	1
can-miR172a-3p	0	0	0	0	0	0	0	0	0	0	1	0	0	0	0	1	1	0	0	3
can-miR172b-3p	0	0	0	0	0	0	0	0	0	0	1	0	0	0	0	1	1	0	0	3
can-miR172c-3p	0	0	0	0	0	0	0	0	0	0	1	0	0	0	0	1	1	0	0	3
can-miR172d-3p	0	0	0	0	0	0	0	0	0	0	1	0	0	0	0	1	1	0	0	3
can-miR172e-3p	0	0	0	1	0	0	0	0	0	0	1	0	0	0	0	1	1	0	0	4
can-miR172f-3p	0	0	0	1	0	0	0	0	0	0	1	0	0	0	0	1	1	0	0	4
can-miR172g-3p	0	0	0	0	0	0	0	0	0	0	0	0	0	0	0	1	1	0	0	2
can-miR172h-3p	0	0	0	0	0	0	1	0	0	0	1	0	0	0	0	0	1	0	0	3
can-miR172i-3p	0	0	0	0	0	0	0	0	0	0	1	0	0	0	0	0	1	0	0	2
can-miR319a	0	1	0	1	1	0	0	0	0	0	0	0	1	0	0	0	0	0	1	5
can-miR319b-3p.1	0	1	0	1	1	0	0	0	0	0	0	0	1	0	0	0	0	0	1	5
can-miR396a-5p	0	0	0	0	0	0	0	0	0	1	0	0	0	0	0	0	0	0	0	1
can-miR396b-5p	0	0	0	0	0	0	0	0	0	1	0	0	0	0	0	0	0	0	0	1
can-miR396c-5p	0	0	0	0	0	0	0	0	0	1	0	0	0	0	0	0	0	0	0	1
can-miR396d-5p	0	0	0	0	0	0	0	0	0	1	0	0	0	0	0	0	0	0	0	1
can-miR397b	0	0	0	0	0	0	0	0	1	0	0	0	0	0	0	0	0	0	0	1
can-miR1446a-5p.2	0	0	0	0	0	0	0	0	0	0	0	0	1	0	0	0	0	0	0	1
can-miR1446b-5p.2	0	0	0	0	0	0	0	0	0	0	0	0	1	0	0	0	0	0	0	1
can-miR2873a	1	0	0	0	0	0	0	0	0	0	0	0	0	0	0	0	0	0	0	1
can-miR2873b	1	0	0	0	0	0	0	0	0	0	0	0	0	0	0	0	0	0	0	1
can-miRC13-5p.1	0	0	0	0	1	0	0	0	0	0	0	0	0	0	0	0	0	1	0	2
can-miRC16-5p.2	0	0	0	0	0	1	0	0	0	0	0	0	0	0	0	0	0	0	0	1
can-miRC21-3p	0	0	0	0	0	0	0	1	0	0	1	0	0	0	0	0	0	0	0	2
can-miRC26-3p	0	0	0	0	0	0	0	0	0	0	1	0	0	0	1	0	1	0	0	3
can-miRC27-5p	0	0	0	0	0	0	0	0	0	0	0	1	0	0	0	0	0	0	0	1
can-miRC29-3p	0	0	0	0	0	0	0	0	0	0	0	0	1	0	0	0	0	0	0	1
Sum	2	2	2	4	3	1	1	1	1	4	11	2	8	3	5	7	13	5	5
Detailed information
miRNA_Acc.	Target_Acc.	Expectation	UPE$	miRNA_start	miRNA_end	Target_start	Target_end	miRNA_aligned_fragment	alignment	Target_aligned_fragment	Inhibition	Multiplicity
>can-miR172h-3p	CaTCP23	3	-1	1	21	2	22	UGAAUCUUGAUGAUGCUGCAU	: : :::::::::::::..	UGGGAACAUCAUCAAGAUUUG	Cleavage	1
>can-miR172a-3p	CaTCP23	3.5	-1	1	21	2	22	AGAAUCUUGAUGAUGCUGCAU	: : :::::::::::::.	UGGGAACAUCAUCAAGAUUUG	Cleavage	1
>can-miR172b-3p	CaTCP23	3.5	-1	1	21	2	22	AGAAUCUUGAUGAUGCUGCAU	: : :::::::::::::.	UGGGAACAUCAUCAAGAUUUG	Cleavage	1
>can-miR172c-3p	CaTCP23	3.5	-1	1	21	2	22	AGAAUCUUGAUGAUGCUGCAU	: : :::::::::::::.	UGGGAACAUCAUCAAGAUUUG	Cleavage	1
>can-miR172d-3p	CaTCP23	3.5	-1	1	21	2	22	AGAAUCUUGAUGAUGCUGCAU	: : :::::::::::::.	UGGGAACAUCAUCAAGAUUUG	Cleavage	1
>can-miR172e-3p	CaTCP23	3.5	-1	1	21	2	22	AGAAUCUUGAUGAUGCUGCAG	: : :::::::::::::.	UGGGAACAUCAUCAAGAUUUG	Cleavage	1
>can-miR172f-3p	CaTCP23	3.5	-1	1	21	2	22	AGAAUCUUGAUGAUGCUGCAG	: : :::::::::::::.	UGGGAACAUCAUCAAGAUUUG	Cleavage	1
>can-miR172i-3p	CaTCP16	3.5	-1	1	21	421	441	GGAAUCUUGAUGAUGCUGCAU	: :::::::::::::.:	UCAAAUCAUCAUCAAGAUUUC	Cleavage	1
>can-miR172i-3p	CaTCP23	3.5	-1	1	21	2	22	GGAAUCUUGAUGAUGCUGCAU	: : :::::::::::::.	UGGGAACAUCAUCAAGAUUUG	Cleavage	1
>can-miRC29-3p	CaTCP19	3.5	-1	1	23	631	653	UGAAACAAAAUGGAGUCUCACAC	:::: :::::::: ::::	UUUCAAGACCCCAUUUUGCUUCA	Cleavage	1
>can-miR159a	CaTCP20	4	-1	1	21	1102	1122	UUUGGAUUGAAGGGAGCUCUA	.:.: :::::::.:::::	AGGGGGACCCUUCAGUCCAAU	Cleavage	1
>can-miR159a	CaTCP21	4	-1	1	21	1066	1086	UUUGGAUUGAAGGGAGCUCUA	.:.: :::::::.:::::	AGGGGGACCCUUCAGUCCAAU	Cleavage	1
>can-miR159b	CaTCP20	4	-1	1	21	1102	1122	UUUGGAUUGAAGGGAGCUCUA	.:.: :::::::.:::::	AGGGGGACCCUUCAGUCCAAU	Cleavage	1
>can-miR159b	CaTCP21	4	-1	1	21	1066	1086	UUUGGAUUGAAGGGAGCUCUA	.:.: :::::::.:::::	AGGGGGACCCUUCAGUCCAAU	Cleavage	1
>can-miR159c-3p.1	CaTCP20	4	-1	1	21	1102	1122	UUUGGAUUGAAGGGAGCUCUA	.:.: :::::::.:::::	AGGGGGACCCUUCAGUCCAAU	Cleavage	1
>can-miR159c-3p.1	CaTCP21	4	-1	1	21	1066	1086	UUUGGAUUGAAGGGAGCUCUA	.:.: :::::::.:::::	AGGGGGACCCUUCAGUCCAAU	Cleavage	1
>can-miR396a-5p	CaTCP15	4	-1	1	21	1050	1070	UUCCACAGCUUUCUUGAACUG	:: .:::::::::::.:	AUUUUGUGGAAAGCUGUGGGA	Cleavage	1
>can-miR396b-5p	CaTCP15	4	-1	1	21	1050	1070	UUCCACAGCUUUCUUGAACUG	:: .:::::::::::.:	AUUUUGUGGAAAGCUGUGGGA	Cleavage	1
>can-miR396d-5p	CaTCP15	4	-1	1	21	1050	1070	UUCCACAGCUUUCUUGAACUA	:: .:::::::::::.:	AUUUUGUGGAAAGCUGUGGGA	Cleavage	1
>can-miR159a	CaTCP19	4.5	-1	1	21	916	936	UUUGGAUUGAAGGGAGCUCUA	.:.: :::::::.::::.	AGGGGACCCCUUCAGUCCAGU	Cleavage	1
>can-miR159a	CaTCP23	4.5	-1	1	21	1077	1097	UUUGGAUUGAAGGGAGCUCUA	.:.: :::::::.::::.	AGGGGACCCCUUCAGUCCAGU	Cleavage	1
>can-miR159a	CaTCP26	4.5	-1	1	21	176	196	UUUGGAUUGAAGGGAGCUCUA	:: ::::: :.:: :::::	AUGAACUCCCAUUAAGCCAAA	Translation	1
>can-miR159b	CaTCP19	4.5	-1	1	21	916	936	UUUGGAUUGAAGGGAGCUCUA	.:.: :::::::.::::.	AGGGGACCCCUUCAGUCCAGU	Cleavage	1
>can-miR159b	CaTCP23	4.5	-1	1	21	1077	1097	UUUGGAUUGAAGGGAGCUCUA	.:.: :::::::.::::.	AGGGGACCCCUUCAGUCCAGU	Cleavage	1
>can-miR159b	CaTCP26	4.5	-1	1	21	176	196	UUUGGAUUGAAGGGAGCUCUA	:: ::::: :.:: :::::	AUGAACUCCCAUUAAGCCAAA	Translation	1
>can-miR159c-3p.1	CaTCP19	4.5	-1	1	21	916	936	UUUGGAUUGAAGGGAGCUCUA	.:.: :::::::.::::.	AGGGGACCCCUUCAGUCCAGU	Cleavage	1
>can-miR159c-3p.1	CaTCP23	4.5	-1	1	21	1077	1097	UUUGGAUUGAAGGGAGCUCUA	.:.: :::::::.::::.	AGGGGACCCCUUCAGUCCAGU	Cleavage	1
>can-miR159c-3p.1	CaTCP26	4.5	-1	1	21	176	196	UUUGGAUUGAAGGGAGCUCUA	:: ::::: :.:: :::::	AUGAACUCCCAUUAAGCCAAA	Translation	1
>can-miR164a-5p	CaTCP18	4.5	-1	1	21	886	906	UGGAGAAGCAGGGCACGUGCA	: : : :.::::::::::	GACCCUUCCUCUGCUUCUCCU	Cleavage	1
>can-miR172a-3p	CaTCP16	4.5	-1	1	21	421	441	AGAAUCUUGAUGAUGCUGCAU	: :::::::::::::.	UCAAAUCAUCAUCAAGAUUUC	Cleavage	1
>can-miR172b-3p	CaTCP16	4.5	-1	1	21	421	441	AGAAUCUUGAUGAUGCUGCAU	: :::::::::::::.	UCAAAUCAUCAUCAAGAUUUC	Cleavage	1
>can-miR172c-3p	CaTCP16	4.5	-1	1	21	421	441	AGAAUCUUGAUGAUGCUGCAU	: :::::::::::::.	UCAAAUCAUCAUCAAGAUUUC	Cleavage	1
>can-miR172d-3p	CaTCP16	4.5	-1	1	21	421	441	AGAAUCUUGAUGAUGCUGCAU	: :::::::::::::.	UCAAAUCAUCAUCAAGAUUUC	Cleavage	1
>can-miR172e-3p	CaTCP16	4.5	-1	1	21	421	441	AGAAUCUUGAUGAUGCUGCAG	: :::::::::::::.	UCAAAUCAUCAUCAAGAUUUC	Cleavage	1
>can-miR172f-3p	CaTCP16	4.5	-1	1	21	421	441	AGAAUCUUGAUGAUGCUGCAG	: :::::::::::::.	UCAAAUCAUCAUCAAGAUUUC	Cleavage	1
>can-miR172h-3p	CaTCP16	4.5	-1	1	21	421	441	UGAAUCUUGAUGAUGCUGCAU	: :::::::::::::.	UCAAAUCAUCAUCAAGAUUUC	Cleavage	1
>can-miR2873a	CaTCP1	4.5	-1	1	21	92	112	UUUCACUGUGAAUUUGGUAUG	:: :::::.::: ::.::	AUAACGAAAUUUACAAUGGAA	Cleavage	1
>can-miR2873b	CaTCP1	4.5	-1	1	21	92	112	UUUCACUGUGAAUUUGGUAUG	:: :::::.::: ::.::	AUAACGAAAUUUACAAUGGAA	Cleavage	1
>can-miR397b	CaTCP13	4.5	-1	1	21	357	377	UGAUUGAGUGCAGCGUAGAUG	:.: ::: :::::.::::	UCUUUCAGCUCCACUCGAUCA	Translation	1
>can-miRC13-5p.1	CaTCP5	4.5	-1	1	21	685	705	UGUAGUUGUAGCCAUUCUAUU	::::::. ::::.::::: :	AAUAGAGAGGCUGCAACUUCU	Cleavage	1
>can-miRC13-5p.1	CaTCP25	4.5	-1	1	21	357	377	UGUAGUUGUAGCCAUUCUAUU	:: :::::::::. :: :::	UAUUGAAUGGCUAUUACAACA	Cleavage	1
>can-miR1446a-5p.2	CaTCP19	5	-1	1	21	38	58	UUUCUGAACUCUCUCCCUCAA	: :::::::: : .::::.	ACGUGGGAGAGAUUGUAGAAG	Cleavage	1
>can-miR1446b-5p.2	CaTCP19	5	-1	1	21	38	58	UUUCUGAACUCUCUCCCUCAA	: :::::::: : .::::.	ACGUGGGAGAGAUUGUAGAAG	Cleavage	1
>can-miR156g	CaTCP16	5	-1	1	21	382	401	UUGACAGAAGAGAGAGAGUAC	:::.:::: ::::: ::::	UCACUUUCUCACUUCU-UCAA	Translation	1
>can-miR156g	CaTCP21	5	-1	1	21	657	677	UUGACAGAAGAGAGAGAGUAC	: :: :: :::::::: :.:	GCACCCUAUCUCUUCUUUUAC	Cleavage	1
>can-miR164c	CaTCP3	5	-1	1	21	1072	1092	UGGAGAAGCAGGGCACAUGUU	:::: ..::::::::. :	ACAAUGUUUUCUGCUUCUUGA	Cleavage	1
>can-miR164d	CaTCP3	5	-1	1	21	1072	1092	UGGAGAAGCAGGGCACAUGCU	:::: ..::::::::. :	ACAAUGUUUUCUGCUUCUUGA	Cleavage	1
>can-miR167a-5p	CaTCP25	5	-1	1	21	1043	1063	UGAAGCUGCCAGCAUGAUCUA	::::::::: :..:.: .:	GUGAUCAUGCUAGUGGUUCUA	Translation	1
>can-miR167b-5p	CaTCP25	5	-1	1	21	1043	1063	UGAAGCUGCCAGCAUGAUCUA	::::::::: :..:.: .:	GUGAUCAUGCUAGUGGUUCUA	Translation	1
>can-miR167c-5p	CaTCP25	5	-1	1	21	1043	1063	UGAAGCUGCCAGCAUGAUCUA	::::::::: :..:.: .:	GUGAUCAUGCUAGUGGUUCUA	Translation	1
>can-miR167d-5p	CaTCP25	5	-1	1	21	1043	1063	UGAAGCUGCCAGCAUGAUCUA	::::::::: :..:.: .:	GUGAUCAUGCUAGUGGUUCUA	Translation	1
>can-miR172a-3p	CaTCP22	5	-1	1	21	605	625	AGAAUCUUGAUGAUGCUGCAU	::: .. ::::.::.::.:	GAGCAAUGCCAUCGAGGUUUU	Cleavage	1
>can-miR172b-3p	CaTCP22	5	-1	1	21	605	625	AGAAUCUUGAUGAUGCUGCAU	::: .. ::::.::.::.:	GAGCAAUGCCAUCGAGGUUUU	Cleavage	1
>can-miR172c-3p	CaTCP22	5	-1	1	21	605	625	AGAAUCUUGAUGAUGCUGCAU	::: .. ::::.::.::.:	GAGCAAUGCCAUCGAGGUUUU	Cleavage	1
>can-miR172d-3p	CaTCP22	5	-1	1	21	605	625	AGAAUCUUGAUGAUGCUGCAU	::: .. ::::.::.::.:	GAGCAAUGCCAUCGAGGUUUU	Cleavage	1
>can-miR172e-3p	CaTCP22	5	-1	1	21	605	625	AGAAUCUUGAUGAUGCUGCAG	::: .. ::::.::.::.:	GAGCAAUGCCAUCGAGGUUUU	Cleavage	1
>can-miR172e-3p	CaTCP4	5	-1	1	21	583	603	AGAAUCUUGAUGAUGCUGCAG	:: ::::::::::: .:	CAACAUGAUCAUCAAGAUAUU	Cleavage	1
>can-miR172f-3p	CaTCP22	5	-1	1	21	605	625	AGAAUCUUGAUGAUGCUGCAG	::: .. ::::.::.::.:	GAGCAAUGCCAUCGAGGUUUU	Cleavage	1
>can-miR172f-3p	CaTCP4	5	-1	1	21	583	603	AGAAUCUUGAUGAUGCUGCAG	:: ::::::::::: .:	CAACAUGAUCAUCAAGAUAUU	Cleavage	1
>can-miR172g-3p	CaTCP22	5	-1	1	21	605	625	AGAAUCUUGAUGCUGCUGCAU	::: .. ::::.::.::.:	GAGCAAUGCCAUCGAGGUUUU	Cleavage	1
>can-miR172g-3p	CaTCP23	5	-1	1	21	2	22	AGAAUCUUGAUGCUGCUGCAU	: : :: ::::::::::.	UGGGAACAUCAUCAAGAUUUG	Cleavage	1
>can-miR172h-3p	CaTCP9	5	-1	1	21	577	597	UGAAUCUUGAUGAUGCUGCAU	.: ..:::::::: ::::	GGAUAUUGUCAUCAAGUUUCA	Cleavage	1
>can-miR396c-5p	CaTCP15	5	-1	1	21	1049	1070	UUCCACAGCUUUCU-UGAACUU	:: ::.. .:::::::::::.:	AAUUUUGUGGAAAGCUGUGGGA	Cleavage	1
>can-miRC16-5p.2	CaTCP7	5	-1	1	21	400	420	UUCUGAUGAAAUUUGAUUGGA	:::..:::.::.::::	GACCCUCAGGUUUUAUUAGAA	Cleavage	1
>can-miRC21-3p	CaTCP16	5	-1	1	21	910	930	AGAAUCGGUUUCUUAGUUGUA	:.:: :::.:: .::::::	CAUAAAGAAGGAAGUGAUUCU	Cleavage	1
>can-miRC21-3p	CaTCP12	5	-1	1	21	895	915	AGAAUCGGUUUCUUAGUUGUA	:::. :::::: :.::::	GUCAAUCAAGAAAAGGGUUCU	Cleavage	1
>can-miRC26-3p	CaTCP23	5	-1	1	21	385	405	UGAUGGAGAAACAACAGUAGC	: :: ::::::: ::::::	GAUAAUGUUGUUGGUCCAUCU	Cleavage	1
>can-miRC26-3p	CaTCP21	5	-1	1	21	891	912	UGAUGGAGAAACAAC-AGUAGC	.:::: : ::::::.:::::	AUUACUAGCAGUUUCUUCAUCA	Cleavage	1
>can-miRC26-3p	CaTCP16	5	-1	1	21	691	711	UGAUGGAGAAACAACAGUAGC	:: : :::::.::: :::	CAAACAGAUGUUUUUCCUUCA	Cleavage	1
>can-miRC27-5p	CaTCP18	5	-1	1	21	522	543	UUGUAAU-AAGAUUUUGGAAAG	: ::::.::::: .::::::	AAUGCCAAGAUCUUCGUUACAA	Cleavage	1
The miRNA sequences were downloaded from the published pepper, the coding sequences (CDS) were used to search possible target miRNAs with the help of psRNATarget.
