# Supplementary material for: Genome-Wide Analysis of the TCP Transcription Factor Gene Family in Pepper (Capsicum annuum L.)
Source: Plants (Basel). 2024 Feb 26;13(5):641. doi: 10.3390/plants13050641 (PMC10934501; doi:10.3390/plants13050641)
Supplement: Supplementary file 1 [file plants-13-00641-s001.zip › Supplementary Table S7.xlsx]

## Sheet: Sheet1
Table S7: The GO enrichment analysis of CaTCP genes.
Go Term	GO ID	GO Annotation	Gene name
biological_process	GO:2001141	regulation of RNA biosynthetic process	CaTCP2, CaTCP5, CaTCP6, CaTCP8, CaTCP9, CaTCP10, CaTCP11, CaTCP13, CaTCP14, CaTCP15, CaTCP16, CaTCP17, CaTCP19, CaTCP20, CaTCP21, CaTCP22, CaTCP23, CaTCP24, CaTCP25, CaTCP26, CaTCP27
biological_process	GO:2000112	regulation of cellular macromolecule biosynthetic process	CaTCP2, CaTCP5, CaTCP6, CaTCP8, CaTCP9, CaTCP10, CaTCP11, CaTCP13, CaTCP14, CaTCP15, CaTCP16, CaTCP17, CaTCP19, CaTCP20, CaTCP21, CaTCP22, CaTCP23, CaTCP24, CaTCP25, CaTCP26, CaTCP27
biological_process	GO:1903506	regulation of nucleic acid-templated transcription	CaTCP2, CaTCP5, CaTCP6, CaTCP8, CaTCP9, CaTCP10, CaTCP11, CaTCP13, CaTCP14, CaTCP15, CaTCP16, CaTCP17, CaTCP19, CaTCP20, CaTCP21, CaTCP22, CaTCP23, CaTCP24, CaTCP25, CaTCP26, CaTCP27
biological_process	GO:0080090	regulation of primary metabolic process	CaTCP2, CaTCP5, CaTCP6, CaTCP8, CaTCP9, CaTCP10, CaTCP11, CaTCP13, CaTCP14, CaTCP15, CaTCP16, CaTCP17, CaTCP19, CaTCP20, CaTCP21, CaTCP22, CaTCP23, CaTCP24, CaTCP25, CaTCP26, CaTCP27
biological_process	GO:0065007	biological regulation	CaTCP2, CaTCP5, CaTCP6, CaTCP8, CaTCP9, CaTCP10, CaTCP11, CaTCP13, CaTCP14, CaTCP15, CaTCP16, CaTCP17, CaTCP19, CaTCP20, CaTCP21, CaTCP22, CaTCP23, CaTCP24, CaTCP25, CaTCP26, CaTCP27
biological_process	GO:0060255	regulation of macromolecule metabolic process	CaTCP2, CaTCP5, CaTCP6, CaTCP8, CaTCP9, CaTCP10, CaTCP11, CaTCP13, CaTCP14, CaTCP15, CaTCP16, CaTCP17, CaTCP19, CaTCP20, CaTCP21, CaTCP22, CaTCP23, CaTCP24, CaTCP25, CaTCP26, CaTCP27
biological_process	GO:0051252	regulation of RNA metabolic process	CaTCP2, CaTCP5, CaTCP6, CaTCP8, CaTCP9, CaTCP10, CaTCP11, CaTCP13, CaTCP14, CaTCP15, CaTCP16, CaTCP17, CaTCP19, CaTCP20, CaTCP21, CaTCP22, CaTCP23, CaTCP24, CaTCP25, CaTCP26, CaTCP27
biological_process	GO:0051171	regulation of nitrogen compound metabolic process	CaTCP2, CaTCP5, CaTCP6, CaTCP8, CaTCP9, CaTCP10, CaTCP11, CaTCP13, CaTCP14, CaTCP15, CaTCP16, CaTCP17, CaTCP19, CaTCP20, CaTCP21, CaTCP22, CaTCP23, CaTCP24, CaTCP25, CaTCP26, CaTCP27
biological_process	GO:0050794	regulation of cellular process	CaTCP2, CaTCP5, CaTCP6, CaTCP8, CaTCP9, CaTCP10, CaTCP11, CaTCP13, CaTCP14, CaTCP15, CaTCP16, CaTCP17, CaTCP19, CaTCP20, CaTCP21, CaTCP22, CaTCP23, CaTCP24, CaTCP25, CaTCP26, CaTCP27
biological_process	GO:0050789	regulation of biological process	CaTCP2, CaTCP5, CaTCP6, CaTCP8, CaTCP9, CaTCP10, CaTCP11, CaTCP13, CaTCP14, CaTCP15, CaTCP16, CaTCP17, CaTCP19, CaTCP20, CaTCP21, CaTCP22, CaTCP23, CaTCP24, CaTCP25, CaTCP26, CaTCP27
biological_process	GO:0031326	regulation of cellular biosynthetic process	CaTCP2, CaTCP5, CaTCP6, CaTCP8, CaTCP9, CaTCP10, CaTCP11, CaTCP13, CaTCP14, CaTCP15, CaTCP16, CaTCP17, CaTCP19, CaTCP20, CaTCP21, CaTCP22, CaTCP23, CaTCP24, CaTCP25, CaTCP26, CaTCP27
biological_process	GO:0031323	regulation of cellular metabolic process	CaTCP2, CaTCP5, CaTCP6, CaTCP8, CaTCP9, CaTCP10, CaTCP11, CaTCP13, CaTCP14, CaTCP15, CaTCP16, CaTCP17, CaTCP19, CaTCP20, CaTCP21, CaTCP22, CaTCP23, CaTCP24, CaTCP25, CaTCP26, CaTCP27
biological_process	GO:0019222	regulation of metabolic process	CaTCP2, CaTCP5, CaTCP6, CaTCP8, CaTCP9, CaTCP10, CaTCP11, CaTCP13, CaTCP14, CaTCP15, CaTCP16, CaTCP17, CaTCP19, CaTCP20, CaTCP21, CaTCP22, CaTCP23, CaTCP24, CaTCP25, CaTCP26, CaTCP27
biological_process	GO:0019219	regulation of nucleobase-containing compound metabolic process	CaTCP2, CaTCP5, CaTCP6, CaTCP8, CaTCP9, CaTCP10, CaTCP11, CaTCP13, CaTCP14, CaTCP15, CaTCP16, CaTCP17, CaTCP19, CaTCP20, CaTCP21, CaTCP22, CaTCP23, CaTCP24, CaTCP25, CaTCP26, CaTCP27
biological_process	GO:0010556	regulation of macromolecule biosynthetic process	CaTCP2, CaTCP5, CaTCP6, CaTCP8, CaTCP9, CaTCP10, CaTCP11, CaTCP13, CaTCP14, CaTCP15, CaTCP16, CaTCP17, CaTCP19, CaTCP20, CaTCP21, CaTCP22, CaTCP23, CaTCP24, CaTCP25, CaTCP26, CaTCP27
biological_process	GO:0010468	regulation of gene expression	CaTCP2, CaTCP5, CaTCP6, CaTCP8, CaTCP9, CaTCP10, CaTCP11, CaTCP13, CaTCP14, CaTCP15, CaTCP16, CaTCP17, CaTCP19, CaTCP20, CaTCP21, CaTCP22, CaTCP23, CaTCP24, CaTCP25, CaTCP26, CaTCP27
biological_process	GO:0009889	regulation of biosynthetic process	CaTCP2, CaTCP5, CaTCP6, CaTCP8, CaTCP9, CaTCP10, CaTCP11, CaTCP13, CaTCP14, CaTCP15, CaTCP16, CaTCP17, CaTCP19, CaTCP20, CaTCP21, CaTCP22, CaTCP23, CaTCP24, CaTCP25, CaTCP26, CaTCP27
biological_process	GO:0008150	biological_process	CaTCP2, CaTCP5, CaTCP6, CaTCP8, CaTCP9, CaTCP10, CaTCP11, CaTCP13, CaTCP14, CaTCP15, CaTCP16, CaTCP17, CaTCP19, CaTCP20, CaTCP21, CaTCP22, CaTCP23, CaTCP24, CaTCP25, CaTCP26, CaTCP27
biological_process	GO:0006355	regulation of DNA-templated transcription	CaTCP2, CaTCP5, CaTCP6, CaTCP8, CaTCP9, CaTCP10, CaTCP11, CaTCP13, CaTCP14, CaTCP15, CaTCP16, CaTCP17, CaTCP19, CaTCP20, CaTCP21, CaTCP22, CaTCP23, CaTCP24, CaTCP25, CaTCP26, CaTCP27
biological_process	GO:0048856	anatomical structure development	CaTCP2, CaTCP5, CaTCP6, CaTCP9, CaTCP10, CaTCP11, CaTCP15, CaTCP16, CaTCP17, CaTCP19, CaTCP20, CaTCP21, CaTCP23, CaTCP25
biological_process	GO:0032502	developmental process	CaTCP2, CaTCP5, CaTCP6, CaTCP9, CaTCP10, CaTCP11, CaTCP15, CaTCP16, CaTCP17, CaTCP19, CaTCP20, CaTCP21, CaTCP23, CaTCP25
biological_process	GO:0050793	regulation of developmental process	CaTCP9, CaTCP10, CaTCP11, CaTCP14, CaTCP15, CaTCP16, CaTCP17, CaTCP19, CaTCP20, CaTCP21, CaTCP23, CaTCP26
biological_process	GO:0048731	system development	CaTCP5, CaTCP9, CaTCP10, CaTCP11, CaTCP15, CaTCP16, CaTCP17, CaTCP19, CaTCP20, CaTCP21, CaTCP23, CaTCP25
biological_process	GO:0048367	shoot system development	CaTCP5, CaTCP9, CaTCP10, CaTCP11, CaTCP15, CaTCP16, CaTCP17, CaTCP19, CaTCP20, CaTCP21, CaTCP23, CaTCP25
biological_process	GO:0032501	multicellular organismal process	CaTCP5, CaTCP9, CaTCP10, CaTCP11, CaTCP15, CaTCP16, CaTCP17, CaTCP19, CaTCP20, CaTCP21, CaTCP23, CaTCP25
biological_process	GO:0007275	multicellular organism development	CaTCP5, CaTCP9, CaTCP10, CaTCP11, CaTCP15, CaTCP16, CaTCP17, CaTCP19, CaTCP20, CaTCP21, CaTCP23, CaTCP25
biological_process	GO:0009653	anatomical structure morphogenesis	CaTCP2, CaTCP6, CaTCP9, CaTCP11, CaTCP15, CaTCP16, CaTCP19, CaTCP20, CaTCP21, CaTCP23
biological_process	GO:0010016	shoot system morphogenesis	CaTCP9, CaTCP11, CaTCP15, CaTCP16, CaTCP19, CaTCP20, CaTCP21, CaTCP23
biological_process	GO:2000026	regulation of multicellular organismal development	CaTCP10, CaTCP11, CaTCP15, CaTCP17, CaTCP20, CaTCP21, CaTCP26
biological_process	GO:0051239	regulation of multicellular organismal process	CaTCP10, CaTCP11, CaTCP15, CaTCP17, CaTCP20, CaTCP21, CaTCP27
biological_process	GO:0050896	response to stimulus	CaTCP10, CaTCP17, CaTCP19, CaTCP20, CaTCP21, CaTCP23, CaTCP25
biological_process	GO:0040034	regulation of development, heterochronic	CaTCP9, CaTCP14, CaTCP16, CaTCP19, CaTCP20, CaTCP21, CaTCP237
biological_process	GO:0009987	cellular process	CaTCP9, CaTCP16, CaTCP19, CaTCP20, CaTCP21, CaTCP23, CaTCP25
biological_process	GO:1905392	plant organ morphogenesis	CaTCP9, CaTCP16, CaTCP19, CaTCP20, CaTCP21, CaTCP23
biological_process	GO:0099402	plant organ development	CaTCP9, CaTCP16, CaTCP19, CaTCP20, CaTCP21, CaTCP23
biological_process	GO:0061458	reproductive system development	CaTCP5, CaTCP10, CaTCP17, CaTCP19, CaTCP23, CaTCP25
biological_process	GO:0048869	cellular developmental process	CaTCP9, CaTCP16, CaTCP19, CaTCP20, CaTCP21, CaTCP23
biological_process	GO:0048827	phyllome development	CaTCP9, CaTCP16, CaTCP19, CaTCP20, CaTCP21, CaTCP23
biological_process	GO:0048608	reproductive structure development	CaTCP5, CaTCP10, CaTCP17, CaTCP19, CaTCP23, CaTCP25
biological_process	GO:0048583	regulation of response to stimulus	CaTCP8, CaTCP10, CaTCP16, CaTCP17, CaTCP20, CaTCP21
biological_process	GO:0048366	leaf development	CaTCP9, CaTCP16, CaTCP19, CaTCP20, CaTCP21, CaTCP23
biological_process	GO:0045962	positive regulation of development, heterochronic	CaTCP9, CaTCP16, CaTCP19, CaTCP20, CaTCP21, CaTCP23
biological_process	GO:0030154	cell differentiation	CaTCP9, CaTCP16, CaTCP19, CaTCP20, CaTCP21, CaTCP23
biological_process	GO:0022414	reproductive process	CaTCP5, CaTCP10, CaTCP17, CaTCP19, CaTCP23, CaTCP25
biological_process	GO:0009965	leaf morphogenesis	CaTCP9, CaTCP16, CaTCP19, CaTCP20, CaTCP21, CaTCP23
biological_process	GO:0009791	post-embryonic development	CaTCP5, CaTCP10, CaTCP17, CaTCP19, CaTCP23, CaTCP25
biological_process	GO:0003006	developmental process involved in reproduction	CaTCP5, CaTCP10, CaTCP17, CaTCP19, CaTCP23, CaTCP25
biological_process	GO:0000003	reproduction	CaTCP5, CaTCP10, CaTCP17, CaTCP19, CaTCP23, CaTCP25
biological_process	GO:0042221	response to chemical	CaTCP10, CaTCP17, CaTCP19, CaTCP23, CaTCP25
biological_process	GO:0010033	response to organic substance	CaTCP10, CaTCP17, CaTCP19, CaTCP23, CaTCP25
biological_process	GO:0009725	response to hormone	CaTCP10, CaTCP17, CaTCP19, CaTCP23, CaTCP25
biological_process	GO:0009719	response to endogenous stimulus	CaTCP10, CaTCP17, CaTCP19, CaTCP23, CaTCP25
biological_process	GO:0090567	reproductive shoot system development	CaTCP5, CaTCP10, CaTCP17, CaTCP25
biological_process	GO:0080134	regulation of response to stress	CaTCP8, CaTCP10, CaTCP16, CaTCP17
biological_process	GO:0048580	regulation of post-embryonic development	CaTCP10, CaTCP17, CaTCP20, CaTCP21
biological_process	GO:0048519	negative regulation of biological process	CaTCP13, CaTCP20, CaTCP21, CaTCP22
biological_process	GO:0031347	regulation of defense response	CaTCP8, CaTCP10, CaTCP16, CaTCP17
biological_process	GO:2000032	regulation of secondary shoot formation	CaTCP11, CaTCP15, CaTCP26
biological_process	GO:1905428	regulation of plant organ formation	CaTCP11, CaTCP15, CaTCP26
biological_process	GO:1900618	regulation of shoot system morphogenesis	CaTCP11, CaTCP15, CaTCP26
biological_process	GO:0060688	regulation of morphogenesis of a branching structure	CaTCP11, CaTCP15, CaTCP26
biological_process	GO:0048831	regulation of shoot system development	CaTCP11, CaTCP15, CaTCP26
biological_process	GO:0022603	regulation of anatomical structure morphogenesis	CaTCP11, CaTCP15, CaTCP26
biological_process	GO:0010229	inflorescence development	CaTCP10, CaTCP17, CaTCP25
biological_process	GO:0009735	response to cytokinin	CaTCP10, CaTCP17, CaTCP25
biological_process	GO:0008283	cell population proliferation	CaTCP10, CaTCP17, CaTCP25
biological_process	GO:2000306	positive regulation of photomorphogenesis	CaTCP20, CaTCP21
biological_process	GO:2000030	regulation of response to red or far red light	CaTCP20, CaTCP21
biological_process	GO:1905393	plant organ formation	CaTCP11, CaTCP15
biological_process	GO:1903508	positive regulation of nucleic acid-templated transcription	CaTCP20, CaTCP21
biological_process	GO:1902680	positive regulation of RNA biosynthetic process	CaTCP20, CaTCP21
biological_process	GO:1901700	response to oxygen-containing compound	CaTCP10, CaTCP17
biological_process	GO:1900140	regulation of seedling development	CaTCP10, CaTCP17
biological_process	GO:0097305	response to alcohol	CaTCP10, CaTCP17
biological_process	GO:0090698	post-embryonic plant morphogenesis	CaTCP19, CaTCP23
biological_process	GO:0065009	regulation of molecular function	CaTCP13, CaTCP22
biological_process	GO:0051254	positive regulation of RNA metabolic process	CaTCP20, CaTCP21
biological_process	GO:0051240	positive regulation of multicellular organismal process	CaTCP20, CaTCP21
biological_process	GO:0051173	positive regulation of nitrogen compound metabolic process	CaTCP20, CaTCP21
biological_process	GO:0051094	positive regulation of developmental process	CaTCP20, CaTCP21
biological_process	GO:0051090	regulation of DNA-binding transcription factor activity	CaTCP13, CaTCP22
biological_process	GO:0048826	cotyledon morphogenesis	CaTCP19, CaTCP23
biological_process	GO:0048825	cotyledon development	CaTCP19, CaTCP23
biological_process	GO:0048646	anatomical structure formation involved in morphogenesis	CaTCP11, CaTCP15
biological_process	GO:0048598	embryonic morphogenesis	CaTCP19, CaTCP23
biological_process	GO:0048584	positive regulation of response to stimulus	CaTCP20, CaTCP21
biological_process	GO:0048582	positive regulation of post-embryonic development	CaTCP20, CaTCP21
biological_process	GO:0048523	negative regulation of cellular process	CaTCP20, CaTCP21
biological_process	GO:0048522	positive regulation of cellular process	CaTCP20, CaTCP21
biological_process	GO:0048518	positive regulation of biological process	CaTCP20, CaTCP21
biological_process	GO:0048511	rhythmic process	CaTCP24, CaTCP25
biological_process	GO:0048316	seed development	CaTCP19, CaTCP23
biological_process	GO:0045935	positive regulation of nucleobase-containing compound metabolic process	CaTCP20, CaTCP21
biological_process	GO:0044092	negative regulation of molecular function	CaTCP13, CaTCP22
biological_process	GO:0043433	negative regulation of DNA-binding transcription factor activity	CaTCP13, CaTCP22
biological_process	GO:0042752	regulation of circadian rhythm	CaTCP13, CaTCP22
biological_process	GO:0042127	regulation of cell population proliferation	CaTCP20, CaTCP21
biological_process	GO:0033993	response to lipid	CaTCP10, CaTCP17
biological_process	GO:0031328	positive regulation of cellular biosynthetic process	CaTCP20, CaTCP21
biological_process	GO:0031325	positive regulation of cellular metabolic process	CaTCP20, CaTCP21
biological_process	GO:0010604	positive regulation of macromolecule metabolic process	CaTCP20, CaTCP21
biological_process	GO:0010557	positive regulation of macromolecule biosynthetic process	CaTCP20, CaTCP21
biological_process	GO:0010346	shoot axis formation	CaTCP11, CaTCP15
biological_process	GO:0010223	secondary shoot formation	CaTCP11, CaTCP15
biological_process	GO:0010154	fruit development	CaTCP19, CaTCP23
biological_process	GO:0010099	regulation of photomorphogenesis	CaTCP20, CaTCP21
biological_process	GO:0010029	regulation of seed germination	CaTCP10, CaTCP17
biological_process	GO:0009908	flower development	CaTCP5, CaTCP25
biological_process	GO:0009893	positive regulation of metabolic process	CaTCP20, CaTCP21
biological_process	GO:0009891	positive regulation of biosynthetic process	CaTCP20, CaTCP21
biological_process	GO:0009793	embryo development ending in seed dormancy	CaTCP19, CaTCP23
biological_process	GO:0009790	embryo development	CaTCP19, CaTCP23
biological_process	GO:0009739	response to gibberellin	CaTCP10, CaTCP17
biological_process	GO:0009737	response to abscisic acid	CaTCP10, CaTCP17
biological_process	GO:0009733	response to auxin	CaTCP19, CaTCP23
biological_process	GO:0009637	response to blue light	CaTCP20, CaTCP21
biological_process	GO:0009628	response to abiotic stimulus	CaTCP20, CaTCP21
biological_process	GO:0009416	response to light stimulus	CaTCP20, CaTCP21
biological_process	GO:0009314	response to radiation	CaTCP20, CaTCP21
biological_process	GO:0008285	negative regulation of cell population proliferation	CaTCP20, CaTCP21
biological_process	GO:0007623	circadian rhythm	CaTCP24, CaTCP25
biological_process	GO:0001763	morphogenesis of a branching structure	CaTCP11, CaTCP15
biological_process	GO:0001101	response to acid chemical	CaTCP10, CaTCP17
biological_process	GO:1901576	organic substance biosynthetic process	CaTCP25
biological_process	GO:1901360	organic cyclic compound metabolic process	CaTCP25
biological_process	GO:0090304	nucleic acid metabolic process	CaTCP25
biological_process	GO:0071704	organic substance metabolic process	CaTCP25
biological_process	GO:0065008	regulation of biological quality	CaTCP25
biological_process	GO:0048878	chemical homeostasis	CaTCP25
biological_process	GO:0048510	regulation of timing of transition from vegetative to reproductive phase	CaTCP14
biological_process	GO:0048509	regulation of meristem development	CaTCP14
biological_process	GO:0048506	regulation of timing of meristematic phase transition	CaTCP14
biological_process	GO:0048467	gynoecium development	CaTCP25
biological_process	GO:0048438	floral whorl development	CaTCP25
biological_process	GO:0046483	heterocycle metabolic process	CaTCP25
biological_process	GO:0044786	cell cycle DNA replication	CaTCP25
biological_process	GO:0044260	cellular macromolecule metabolic process	CaTCP25
biological_process	GO:0044249	cellular biosynthetic process	CaTCP25
biological_process	GO:0044238	primary metabolic process	CaTCP25
biological_process	GO:0044237	cellular metabolic process	CaTCP25
biological_process	GO:0043170	macromolecule metabolic process	CaTCP25
biological_process	GO:0042592	homeostatic process	CaTCP25
biological_process	GO:0042023	DNA endoreduplication	CaTCP25
biological_process	GO:0034645	cellular macromolecule biosynthetic process	CaTCP25
biological_process	GO:0034641	cellular nitrogen compound metabolic process	CaTCP25
biological_process	GO:0031540	regulation of anthocyanin biosynthetic process	CaTCP25
biological_process	GO:0031537	regulation of anthocyanin metabolic process	CaTCP25
biological_process	GO:0022402	cell cycle process	CaTCP25
biological_process	GO:0010252	auxin homeostasis	CaTCP25
biological_process	GO:0009962	regulation of flavonoid biosynthetic process	CaTCP25
biological_process	GO:0009059	macromolecule biosynthetic process	CaTCP25
biological_process	GO:0009058	biosynthetic process	CaTCP25
biological_process	GO:0008152	metabolic process	CaTCP25
biological_process	GO:0007049	cell cycle	CaTCP25
biological_process	GO:0006807	nitrogen compound metabolic process	CaTCP25
biological_process	GO:0006725	cellular aromatic compound metabolic process	CaTCP25
biological_process	GO:0006261	DNA-templated DNA replication	CaTCP25
biological_process	GO:0006260	DNA replication	CaTCP25
biological_process	GO:0006259	DNA metabolic process	CaTCP25
biological_process	GO:0006139	nucleobase-containing compound metabolic process	CaTCP25
Go Term	GO ID	GO Annotation	Gene name
molecular_function	GO:0140110	transcription regulator activity	CaTCP10, CaTCP11, CaTCP13, CaTCP14, CaTCP15, CaTCP16, CaTCP17, CaTCP19, CaTCP20, CaTCP21, CaTCP22, CaTCP23, CaTCP24, CaTCP25, CaTCP26, CaTCP27, CaTCP2, CaTCP5, CaTCP6, CaTCP8, CaTCP9
molecular_function	GO:0003700	DNA-binding transcription factor activity	CaTCP10, CaTCP11, CaTCP13, CaTCP14, CaTCP15, CaTCP16, CaTCP17, CaTCP19, CaTCP20, CaTCP21, CaTCP22, CaTCP23, CaTCP24, CaTCP25, CaTCP26, CaTCP27, CaTCP2, CaTCP5, CaTCP6, CaTCP8, CaTCP9
molecular_function	GO:0003674	molecular_function	CaTCP10, CaTCP11, CaTCP13, CaTCP14, CaTCP15, CaTCP16, CaTCP17, CaTCP19, CaTCP20, CaTCP21, CaTCP22, CaTCP23, CaTCP24, CaTCP25, CaTCP26, CaTCP27, CaTCP2, CaTCP5, CaTCP6, CaTCP8, CaTCP9
molecular_function	GO:1901363	heterocyclic compound binding	CaTCP19, CaTCP20, CaTCP21, CaTCP23, CaTCP27, CaTCP2, CaTCP5, CaTCP6
molecular_function	GO:0097159	organic cyclic compound binding	CaTCP19, CaTCP20, CaTCP21, CaTCP23, CaTCP27, CaTCP2, CaTCP5, CaTCP6
molecular_function	GO:0005488	binding	CaTCP19, CaTCP20, CaTCP21, CaTCP23, CaTCP27, CaTCP2, CaTCP5, CaTCP6
molecular_function	GO:0003677	DNA binding	CaTCP19, CaTCP20, CaTCP21, CaTCP23, CaTCP27, CaTCP2, CaTCP5, CaTCP6
molecular_function	GO:0003676	nucleic acid binding	CaTCP19, CaTCP20, CaTCP21, CaTCP23, CaTCP27, CaTCP2, CaTCP5, CaTCP6
molecular_function	GO:1990837	sequence-specific double-stranded DNA binding	CaTCP27, CaTCP2, CaTCP6
molecular_function	GO:0044212	transcription cis-regulatory region binding	CaTCP27, CaTCP2, CaTCP6
molecular_function	GO:0043565	sequence-specific DNA binding	CaTCP27, CaTCP2, CaTCP6
molecular_function	GO:0003690	double-stranded DNA binding	CaTCP27, CaTCP2, CaTCP6
molecular_function	GO:0001067	transcription regulatory region nucleic acid binding	CaTCP27, CaTCP2, CaTCP6
molecular_function	GO:0000987	cis-regulatory region sequence-specific DNA binding	CaTCP27, CaTCP2, CaTCP6
molecular_function	GO:0000976	transcription cis-regulatory region binding	CaTCP27, CaTCP2, CaTCP6
molecular_function	GO:0001012	RNA polymerase II transcription regulatory region sequence-specific DNA binding	CaTCP27
molecular_function	GO:0000978	RNA polymerase II cis-regulatory region sequence-specific DNA binding	CaTCP27
molecular_function	GO:0000977	RNA polymerase II transcription regulatory region sequence-specific DNA binding	CaTCP27
Go Term	GO ID	GO Annotation	Gene name
cellular_component	GO:0044464	obsolete cell part	CaTCP2, CaTCP6, CaTCP10, CaTCP11, CaTCP13, CaTCP14, CaTCP15, CaTCP16, CaTCP17, CaTCP22, CaTCP26
cellular_component	GO:0044424	obsolete intracellular part	CaTCP2, CaTCP6, CaTCP10, CaTCP11, CaTCP13, CaTCP14, CaTCP15, CaTCP16, CaTCP17, CaTCP22, CaTCP26
cellular_component	GO:0043231	intracellular membrane-bounded organelle	CaTCP2, CaTCP6, CaTCP10, CaTCP11, CaTCP13, CaTCP14, CaTCP15, CaTCP16, CaTCP17, CaTCP22, CaTCP26
cellular_component	GO:0043229	intracellular organelle	CaTCP2, CaTCP6, CaTCP10, CaTCP11, CaTCP13, CaTCP14, CaTCP15, CaTCP16, CaTCP17, CaTCP22, CaTCP26
cellular_component	GO:0043227	membrane-bounded organelle	CaTCP2, CaTCP6, CaTCP10, CaTCP11, CaTCP13, CaTCP14, CaTCP15, CaTCP16, CaTCP17, CaTCP22, CaTCP26
cellular_component	GO:0043226	organelle	CaTCP2, CaTCP6, CaTCP10, CaTCP11, CaTCP13, CaTCP14, CaTCP15, CaTCP16, CaTCP17, CaTCP22, CaTCP26
cellular_component	GO:0005623	obsolete cell	CaTCP2, CaTCP6, CaTCP10, CaTCP11, CaTCP13, CaTCP14, CaTCP15, CaTCP16, CaTCP17, CaTCP22, CaTCP26
cellular_component	GO:0005622	intracellular anatomical structure	CaTCP2, CaTCP6, CaTCP10, CaTCP11, CaTCP13, CaTCP14, CaTCP15, CaTCP16, CaTCP17, CaTCP22, CaTCP26
cellular_component	GO:0005575	cellular_component	CaTCP2, CaTCP6, CaTCP10, CaTCP11, CaTCP13, CaTCP14, CaTCP15, CaTCP16, CaTCP17, CaTCP22, CaTCP26
cellular_component	GO:0005634	nucleus	CaTCP2, CaTCP6, CaTCP10, CaTCP11, CaTCP13, CaTCP14, CaTCP15, CaTCP17, CaTCP22, CaTCP26
cellular_component	GO:0044444	obsolete cytoplasmic part	CaTCP16
cellular_component	GO:0009536	plastid	CaTCP16
cellular_component	GO:0009507	chloroplast	CaTCP16
cellular_component	GO:0005737	cytoplasm	CaTCP16
GO annotation analysis were performed with the help of eggnog website.
