# Supplementary material for: Genome-Wide Analysis of the TCP Transcription Factor Gene Family in Pepper (Capsicum annuum L.)
Source: Plants (Basel). 2024 Feb 26;13(5):641. doi: 10.3390/plants13050641 (PMC10934501; doi:10.3390/plants13050641)
Supplement: Supplementary file 1 [file plants-13-00641-s001.zip › Supplementary Table S8.xlsx]

## Sheet: Sheet1
Table S8: The raw data of qRT-PCR
Gene	SL	BL	FB	LB	SL	BL	FB	LB
	Relative expression				Standard Deviation of Relative expression
CaTCP1	0.000290795	0.0229819	0.016488	0.00487388	1.83e-05	0.00447635	0.00160827	0.00184221
CaTCP2	0.00407727	0.013448	0.0158942	0.0153678	0.000419007	0.00292362	0.00168749	0.00232029
CaTCP3	0.00329716	0.0122726	0.00836734	0.0137574	0.000352973	0.00375022	0.000582146	0.00454495
CaTCP4	0.0362529	0.0392889	0.0249035	0.094	0.000666178	0.00266779	0.00422506	0.042656
CaTCP5	0.000387472	0.0105949	0.00848601	0.00090759	0.000159855	0.000203797	0.00285692	9.8e-05
CaTCP6	0.0176294	0.0100823	0.0171031	0.0285109	0.00145252	0.00549566	0.00699303	0.00645444
CaTCP7	0.00107382	0.00844246	0.00250956	0.000610527	0.00012796	0.00272632	0.00184597	0.000238036
CaTCP8	0.00843622	0.0303891	0.0181023	0.0706746	0.000769212	0.0113554	0.00495771	0.016748
CaTCP9	0.00118784	0.00531256	0.00255654	0.00419232	0.000121903	0.00169662	0.000287406	0.000303434
CaTCP10	0.0208661	0.0245311	0.0136372	0.00598927	0.00194482	0.000916136	0.00191616	0.000830878
CaTCP11	0.00191798	0.00297817	0.00992379	0.0103753	0.000107377	0.000836481	0.00174582	0.000800162
CaTCP12	0.000490433	0.0101306	0.0386029	0.0355245	0.000137801	0.00114639	0.00970126	0.00514283
CaTCP13	0.0879135	0.1516	0.0639511	0.0759188	0.00916661	0.014896	0.00714117	0.0153084
CaTCP14	0.00537683	0.0150711	0.00925486	0.0430808	0.000255806	0.00233517	0.00158687	0.00664429
CaTCP15	0.0397662	0.0435093	0.0178695	0.062215	0.00787294	0.0135886	0.0046226	0.0180673
CaTCP16	0.00625399	0.0241704	0.00486219	0.0224776	0.0011684	0.000305916	0.000780373	0.00139662
CaTCP17	0.00968506	0.0182174	0.0179092	0.030676	0.00138322	0.00855656	0.00373081	0.00474144
CaTCP18	0.027604	0.0654965	0.0140262	0.0308597	0.00208311	0.00936299	0.000591306	0.010359
CaTCP19	0.0079797	0.0634259	0.00817347	0.712008	0.000738977	0.0120848	0.000980974	0.0862541
CaTCP20	0.139424	0.239834	0.0626987	0.0895789	0.00730108	0.0265728	0.00401735	0.0190237
CaTCP21	0.00119989	0.00801678	0.0128194	0.0103335	0.000490239	0.00105775	0.00192278	0.000777635
CaTCP22	0.0119459	0.0376515	0.0242282	0.02553	0.00339826	0.0105523	0.00176582	0.00233409
CaTCP23	0.00528327	0.00553614	0.0015119	0.00114242	0.00110984	0.00115757	0.000126334	8.69e-05
CaTCP24	0.0120373	0.0177478	0.0122177	0.00952008	0.00295075	0.00376275	0.00161473	0.00224919
CaTCP25	1.11712	1.0513	2.58833	1.74169	0.129348	0.307801	0.798331	0.462143
CaTCP26	0.000542911	0.000966109	0.00434887	0.00474033	4.86e-05	0.000159626	0.000422244	0.000989451
CaTCP27	0.0273061	0.0474925	0.00834062	0.0207174	0.00430228	0.0020678	0.000364088	0.00330289
The value in this sheet is the mean of the relative expression of three samples, we calculated the strand deviation for each value.
