# Supplementary material for: Genome-Wide Analysis of the TCP Transcription Factor Gene Family in Pepper (Capsicum annuum L.)
Source: Plants (Basel). 2024 Feb 26;13(5):641. doi: 10.3390/plants13050641 (PMC10934501; doi:10.3390/plants13050641)
Supplement: Supplementary file 1 [file plants-13-00641-s001.zip › Supplementary Table S9.xlsx]

## Sheet: Sheet1
Table S9: Information of hormone- related, stress-related cis-elements and distribution information in the CaTCPs.
Element name	CaTCP1	CaTCP2	CaTCP3	CaTCP4	CaTCP5	CaTCP6	CaTCP7	CaTCP8	CaTCP9	CaTCP10	CaTCP11	CaTCP12	CaTCP13	CaTCP14	CaTCP15	CaTCP16	CaTCP17	CaTCP18	CaTCP19	CaTCP20	CaTCP21	CaTCP22	CaTCP23	CaTCP24	CaTCP25	CaTCP26	CaTCP27
Abscisic acid responsiveness	2	0	0	4	3	5	2	3	5	1	2	2	2	1	2	1	4	1	1	0	3	2	1	2	1	7	1
Anaerobic responsive element	2	2	0	1	1	0	2	0	2	0	1	0	1	1	1	1	1	1	1	2	2	0	3	0	0	1	0
anoxic responsiveness element	0	0	0	1	0	0	0	0	0	0	0	0	0	0	0	0	0	0	0	0	0	1	0	1	0	0	0
auxin-responsive element	0	0	0	1	0	1	0	1	1	0	1	0	0	0	1	0	0	0	0	1	0	1	0	0	0	0	1
Auxin responsive element	0	0	0	1	0	0	0	0	0	2	0	0	0	0	0	1	0	0	0	0	0	1	0	0	0	0	0
binding protein	1	1	0	1	0	0	0	0	0	0	0	1	0	0	0	0	0	0	0	0	1	0	1	0	0	0	0
circadian control responsiveness element	1	0	0	0	0	0	1	0	0	0	0	0	0	0	0	2	0	0	0	0	0	0	2	0	0	1	3
cis-acting regulatory element	0	0	0	0	0	0	0	0	0	0	0	0	0	0	0	0	0	0	0	0	0	0	0	1	0	0	0
defense and stress responsiveness element	2	1	0	0	2	1	2	1	0	0	1	0	0	1	0	0	0	0	1	1	2	0	0	0	2	1	2
Drought responsive element	1	0	2	1	0	1	0	0	0	0	2	0	1	0	0	2	0	0	1	0	1	0	1	1	1	0	0
element for maximal elicitor-mediated activation (2copies)	0	0	0	0	1	0	0	0	0	0	0	0	0	0	0	0	0	0	0	0	0	0	0	0	0	0	1
endosperm expression regulation element	0	0	0	0	0	0	0	1	0	0	1	0	0	0	0	0	0	0	0	0	0	0	0	0	1	0	0
GA responsiveness element	0	1	0	2	0	0	0	0	1	0	0	0	0	0	0	0	0	0	1	0	1	0	0	0	0	0	0
Gibberellin responsive element	0	0	0	2	0	2	0	1	0	0	2	1	0	0	0	0	0	0	0	1	0	0	0	0	0	0	0
involved in endosperm-specific negative expression	0	0	0	0	0	0	0	0	0	0	0	0	0	0	0	0	0	0	0	0	0	0	0	0	0	0	1
light responsive element	11	6	7	4	1	6	1	6	7	2	3	4	4	3	6	12	3	4	8	3	4	9	6	1	2	8	5
Light responsive element	10	5	5	12	4	10	8	6	11	4	3	6	2	3	7	8	11	5	9	2	7	3	5	3	3	11	10
light responsiveness element	1	2	1	0	1	0	2	1	1	0	0	0	0	0	0	2	1	3	0	0	0	0	1	0	0	2	0
Low temperature responsive element	1	3	1	1	0	1	1	0	0	1	0	0	0	0	0	0	1	0	0	0	1	1	1	1	0	0	0
MeJA responsiveness element	0	0	0	2	4	4	0	4	4	0	0	0	0	4	0	0	2	2	0	0	2	2	2	4	0	2	2
meristem expression regulation element	0	0	3	2	1	1	0	0	1	0	1	0	1	0	0	0	0	0	1	0	2	0	0	0	0	0	0
mesophyll cells responsiveness element	0	0	0	0	1	0	0	0	0	0	0	0	0	0	0	0	0	2	0	0	0	0	0	0	1	0	0
MYB responsiveness element	0	0	2	0	0	1	0	1	0	0	0	0	0	0	0	0	0	0	0	0	0	0	1	1	0	0	0
part of a light responsive element	8	4	6	3	1	3	1	5	5	2	2	4	3	2	6	9	1	2	5	1	4	9	5	0	2	7	5
part of a light responsive module	0	0	1	0	0	0	0	0	0	0	0	0	0	0	0	0	0	0	0	0	0	1	1	0	0	0	0
part of an auxin-responsive element	0	0	0	0	0	0	0	1	0	0	0	0	0	0	0	0	0	0	0	0	0	0	0	0	0	0	0
Salicylic acid responsive element	0	1	2	0	1	0	1	2	0	1	1	0	0	1	2	1	0	1	0	0	1	0	0	1	0	0	0
seed-specific responsiveness element	0	0	1	0	0	0	0	0	0	0	0	1	0	0	0	0	0	0	0	0	0	0	0	0	0	0	0
zein metabolism regulation element	0	0	0	0	1	0	1	0	0	0	1	2	0	1	0	1	1	0	1	0	0	0	2	1	0	0	1
The cis-acting elements were predicted through sequences against between the promoter and the PlantCARE.
Detailed information
Gene ID	cis element	sequence	position	length	strand	plant source	cis element description
CaTCP10::chr03:273299638-273301638	AE-box	AGAAACAA	194	8	+	Arabidopsis thaliana	Light responsive element
CaTCP10::chr03:273299638-273301638	G-Box	CACGTG	1204	6	-	Pisum sativum	Light responsive element
CaTCP10::chr03:273299638-273301638	TCA-element	CCATCTTTTT	5	9	-	Nicotiana tabacum	Salicylic acid responsive element
CaTCP10::chr03:273299638-273301638	LTR	CCGAAA	50	6	+	Hordeum vulgare	Low temperature responsive element
CaTCP10::chr03:273299638-273301638	GATA-motif	AAGATAAGATT	902	10	-	Arabidopsis thaliana	part of a light responsive element
CaTCP10::chr03:273299638-273301638	AuxRR-core	GGTCCAT	856	7	-	Nicotiana tabacum	Auxin responsive element
CaTCP10::chr03:273299638-273301638	ABRE	ACGTG	1205	5	+	Arabidopsis thaliana	Abscisic acid responsiveness
CaTCP10::chr03:273299638-273301638	TCCC-motif	TCTCCCT	1642	7	+	Spinacia oleracea	part of a light responsive element
CaTCP11::chr03:279071602-279073602	CAT-box	GCCACT	1624	6	+	Arabidopsis thaliana	meristem expression regulation element
CaTCP11::chr03:279071602-279073602	GCN4_motif	TGAGTCA	725	7	+	Oryza sativa	endosperm expression regulation element
CaTCP11::chr03:279071602-279073602	O2-site	GTTGACGTGA	1242	9	-	Zea mays	zein metabolism regulation element
CaTCP11::chr03:279071602-279073602	P-box	CCTTTTG	1157	7	+	Oryza sativa	Gibberellin responsive element
CaTCP11::chr03:279071602-279073602	TCA-element	CCATCTTTTT	1431	9	-	Nicotiana tabacum	Salicylic acid responsive element
CaTCP11::chr03:279071602-279073602	TCT-motif	TCTTAC	118	6	+	Arabidopsis thaliana	part of a light responsive element
CaTCP11::chr03:279071602-279073602	TC-rich repeats	GTTTTCTTAC	797	9	+	Nicotiana tabacum	defense and stress responsiveness element
CaTCP11::chr03:279071602-279073602	GT1-motif	GGTTAA	1165	6	+	Arabidopsis thaliana	light responsive element
CaTCP11::chr03:279071602-279073602	TGA-element	AACGAC	24	6	+	Brassica oleracea	auxin-responsive element
CaTCP11::chr03:279071602-279073602	MBS	CAACTG	1233	6	-	Arabidopsis thaliana	Drought responsive element
CaTCP11::chr03:279071602-279073602	ABRE	CACGTG	1243	6	-	Arabidopsis thaliana	Abscisic acid responsiveness
CaTCP11::chr03:279071602-279073602	G-box	TACGTG	445	6	-	Arabidopsis thaliana	Light responsive element
CaTCP11::chr03:279071602-279073602	I-box	AGATAAGG	155	8	+	Triticum aestivum	part of a light responsive element
CaTCP11::chr03:279071602-279073602	Box 4	ATTAAT	1857	6	-	Petroselinum crispum	Light responsive element
CaTCP11::chr03:279071602-279073602	ARE	AAACCA	1694	6	+	Zea mays	Anaerobic responsive element
CaTCP12::chr05:165110101-165112101	I-box	gGATAAGGTG	1118	9	-	Zea mays	part of a light responsive element
CaTCP12::chr05:165110101-165112101	G-box	ACACGTGT	1498	8	-	Brassica napus	Light responsive element
CaTCP12::chr05:165110101-165112101	G-box	CACGTG	1499	6	-	Arabidopsis thaliana	Light responsive element
CaTCP12::chr05:165110101-165112101	GARE-motif	TCTGTTG	578	7	+	Brassica oleracea	Gibberellin responsive element
CaTCP12::chr05:165110101-165112101	Box 4	ATTAAT	421	6	+	Petroselinum crispum	Light responsive element
CaTCP12::chr05:165110101-165112101	GATA-motif	AAGGATAAGG	59	9	+	Solanum tuberosum	part of a light responsive element
CaTCP12::chr05:165110101-165112101	ABRE	CACGTG	1499	6	-	Arabidopsis thaliana	Abscisic acid responsiveness
CaTCP12::chr05:165110101-165112101	ABRE	ACGTG	1500	5	+	Arabidopsis thaliana	Abscisic acid responsiveness
CaTCP12::chr05:165110101-165112101	TCT-motif	TCTTAC	207	6	+	Arabidopsis thaliana	part of a light responsive element
CaTCP12::chr05:165110101-165112101	AT-rich element	ATAGAAATCAA	1581	10	+	Glycine max	binding protein
CaTCP12::chr05:165110101-165112101	RY-element	CATGCATG	44	8	+	Helianthus annuus	seed-specific responsiveness element
CaTCP12::chr05:165110101-165112101	O2-site	GATGA(C/T)(A/G)TG(A/G)	1236	8	+	Zea mays	zein metabolism regulation element
CaTCP12::chr05:165110101-165112101	O2-site	GATGATGTGG	1798	9	-	Zea mays	zein metabolism regulation element
CaTCP13::chr05:18326552-18328552	Sp1	GGGCGG	1816	6	-	Oryza sativa	light responsive element
CaTCP13::chr05:18326552-18328552	ABRE	ACGTG	1973	5	-	Arabidopsis thaliana	Abscisic acid responsiveness
CaTCP13::chr05:18326552-18328552	ABRE	TACGGTC	1993	7	-	Arabidopsis thaliana	Abscisic acid responsiveness
CaTCP13::chr05:18326552-18328552	MBS	CAACTG	70	6	+	Arabidopsis thaliana	Drought responsive element
CaTCP13::chr05:18326552-18328552	ARE	AAACCA	358	6	+	Zea mays	Anaerobic responsive element
CaTCP13::chr05:18326552-18328552	Box 4	ATTAAT	1685	6	-	Petroselinum crispum	Light responsive element
CaTCP13::chr05:18326552-18328552	GATA-motif	AAGGATAAGG	706	9	+	Solanum tuberosum	part of a light responsive element
CaTCP13::chr05:18326552-18328552	CAT-box	GCCACT	1798	6	+	Arabidopsis thaliana	meristem expression regulation element
CaTCP13::chr05:18326552-18328552	GA-motif	ATAGATAA	1855	8	-	Arabidopsis thaliana	part of a light responsive element
CaTCP13::chr05:18326552-18328552	TCT-motif	TCTTAC	1031	6	+	Arabidopsis thaliana	part of a light responsive element
CaTCP13::chr05:18326552-18328552	G-Box	CACGTT	1973	6	+	Pisum sativum	Light responsive element
CaTCP14::chr06:206946554-206948554	TGACG-motif	TGACG	100	5	-	Hordeum vulgare	MeJA responsiveness element
CaTCP14::chr06:206946554-206948554	ABRE	ACGTG	713	5	-	Arabidopsis thaliana	Abscisic acid responsiveness
CaTCP14::chr06:206946554-206948554	G-box	GCCACGTGGA	711	9	-	Arabidopsis thaliana	Light responsive element
CaTCP14::chr06:206946554-206948554	G-box	TACGTG	713	6	-	Arabidopsis thaliana	Light responsive element
CaTCP14::chr06:206946554-206948554	Box 4	ATTAAT	944	6	+	Petroselinum crispum	Light responsive element
CaTCP14::chr06:206946554-206948554	GATA-motif	AAGGATAAGG	1920	9	-	Solanum tuberosum	part of a light responsive element
CaTCP14::chr06:206946554-206948554	ARE	AAACCA	214	6	+	Zea mays	Anaerobic responsive element
CaTCP14::chr06:206946554-206948554	O2-site	GTTGACGTGA	65	9	-	Zea mays	zein metabolism regulation element
CaTCP14::chr06:206946554-206948554	TCA-element	TCAGAAGAGG	1076	9	+	Brassica oleracea	Salicylic acid responsive element
CaTCP14::chr06:206946554-206948554	TC-rich repeats	GTTTTCTTAC	481	9	-	Nicotiana tabacum	defense and stress responsiveness element
CaTCP14::chr06:206946554-206948554	CGTCA-motif	CGTCA	100	5	+	Hordeum vulgare	MeJA responsiveness element
CaTCP14::chr06:206946554-206948554	TCT-motif	TCTTAC	481	6	-	Arabidopsis thaliana	part of a light responsive element
CaTCP14::chr06:206946554-206948554	GT1-motif	GGTTAA	642	6	+	Arabidopsis thaliana	light responsive element
CaTCP15::chr06:223327428-223329428	TCA-element	CCATCTTTTT	1718	9	-	Nicotiana tabacum	Salicylic acid responsive element
CaTCP15::chr06:223327428-223329428	TCA-element	TCAGAAGAGG	1910	9	+	Brassica oleracea	Salicylic acid responsive element
CaTCP15::chr06:223327428-223329428	Gap-box	CAAATGAA(A/G)A	841	9.5	-	Arabidopsis thaliana	part of a light responsive element
CaTCP15::chr06:223327428-223329428	G-Box	CACGTG	1364	6	-	Pisum sativum	Light responsive element
CaTCP15::chr06:223327428-223329428	TGA-element	AACGAC	813	6	+	Brassica oleracea	auxin-responsive element
CaTCP15::chr06:223327428-223329428	ABRE	CACGTG	1364	6	-	Arabidopsis thaliana	Abscisic acid responsiveness
CaTCP15::chr06:223327428-223329428	ABRE	ACGTG	1365	5	+	Arabidopsis thaliana	Abscisic acid responsiveness
CaTCP15::chr06:223327428-223329428	chs-CMA2a	TCACTTGA	651	8	-	Petroselinum crispum	part of a light responsive element
CaTCP15::chr06:223327428-223329428	GATA-motif	GATAGGG	141	7	+	Pisum sativum	part of a light responsive element
CaTCP15::chr06:223327428-223329428	GATA-motif	GATAGGA	1444	7	-	Arabidopsis thaliana	part of a light responsive element
CaTCP15::chr06:223327428-223329428	Box 4	ATTAAT	573	6	+	Petroselinum crispum	Light responsive element
CaTCP15::chr06:223327428-223329428	ARE	AAACCA	1336	6	-	Zea mays	Anaerobic responsive element
CaTCP15::chr06:223327428-223329428	G-box	TAACACGTAG	22	9	+	Brassica oleracea	Light responsive element
CaTCP15::chr06:223327428-223329428	I-box	atGATAAGGTC	1098	10	+	Helianthus annuus	part of a light responsive element
CaTCP16::chr06:223883640-223885640	AuxRR-core	GGTCCAT	825	7	-	Nicotiana tabacum	Auxin responsive element
CaTCP16::chr06:223883640-223885640	MBS	CAACTG	444	6	+	Arabidopsis thaliana	Drought responsive element
CaTCP16::chr06:223883640-223885640	ABRE	ACGTG	692	5	-	Arabidopsis thaliana	Abscisic acid responsiveness
CaTCP16::chr06:223883640-223885640	ATCT-motif	AATCTAATCC	1098	9	-	Pisum sativum	Light responsive element
CaTCP16::chr06:223883640-223885640	MRE	AACCTAA	100	7	+	Petroselinum crispum	light responsiveness element
CaTCP16::chr06:223883640-223885640	I-box	atGATAAGGTC	1443	10	+	Helianthus annuus	part of a light responsive element
CaTCP16::chr06:223883640-223885640	I-box	AAGATAAGGCT	1888	10	+	Gossypium hirsutum	part of a light responsive element
CaTCP16::chr06:223883640-223885640	I-box	AGATAAGG	1889	8	+	Triticum aestivum	part of a light responsive element
CaTCP16::chr06:223883640-223885640	G-box	CACGTC	692	6	+	Zea mays	Light responsive element
CaTCP16::chr06:223883640-223885640	chs-CMA1a	TTACTTAA	1000	8	-	Daucus carota	part of a light responsive element
CaTCP16::chr06:223883640-223885640	GATA-motif	AAGGATAAGG	1887	9	+	Solanum tuberosum	part of a light responsive element
CaTCP16::chr06:223883640-223885640	GATA-motif	AAGATAAGATT	1888	10	+	Arabidopsis thaliana	part of a light responsive element
CaTCP16::chr06:223883640-223885640	Box 4	ATTAAT	123	6	+	Petroselinum crispum	Light responsive element
CaTCP16::chr06:223883640-223885640	ARE	AAACCA	1247	6	+	Zea mays	Anaerobic responsive element
CaTCP16::chr06:223883640-223885640	O2-site	GATGATGTGG	1075	9	+	Zea mays	zein metabolism regulation element
CaTCP16::chr06:223883640-223885640	TCA-element	CCATCTTTTT	876	9	+	Nicotiana tabacum	Salicylic acid responsive element
CaTCP16::chr06:223883640-223885640	circadian	CAAAGATATC	428	9	+	Lycopersicon esculentum	circadian control responsiveness element
CaTCP16::chr06:223883640-223885640	TCT-motif	TCTTAC	608	6	+	Arabidopsis thaliana	part of a light responsive element
CaTCP16::chr06:223883640-223885640	GT1-motif	GGTTAAT	97	7	-	Avena sativa	light responsive element
CaTCP16::chr06:223883640-223885640	GT1-motif	GGTTAA	98	6	-	Arabidopsis thaliana	light responsive element
CaTCP16::chr06:223883640-223885640	AE-box	AGAAACAA	1938	8	+	Arabidopsis thaliana	Light responsive element
CaTCP17::chr06:225340299-225342299	ABRE	CACGTG	733	6	+	Arabidopsis thaliana	Abscisic acid responsiveness
CaTCP17::chr06:225340299-225342299	ABRE	ACGTG	734	5	+	Arabidopsis thaliana	Abscisic acid responsiveness
CaTCP17::chr06:225340299-225342299	TGACG-motif	TGACG	1034	5	+	Hordeum vulgare	MeJA responsiveness element
CaTCP17::chr06:225340299-225342299	G-box	TCCACGTGGCATT	728	12	-	Arabidopsis thaliana	Light responsive element
CaTCP17::chr06:225340299-225342299	G-box	CTTCCACGTGGCA	730	12	-	Arabidopsis thaliana	Light responsive element
CaTCP17::chr06:225340299-225342299	G-box	GCCACGTGGA	731	10	+	Arabidopsis thaliana	Light responsive element
CaTCP17::chr06:225340299-225342299	G-box	CACGTG	733	6	+	Arabidopsis thaliana	Light responsive element
CaTCP17::chr06:225340299-225342299	G-box	CACGAC	1333	6	+	Zea mays	Light responsive element
CaTCP17::chr06:225340299-225342299	MRE	AACCTAA	499	7	+	Petroselinum crispum	light responsiveness element
CaTCP17::chr06:225340299-225342299	ARE	AAACCA	132	6	-	Zea mays	Anaerobic responsive element
CaTCP17::chr06:225340299-225342299	Box 4	ATTAAT	220	6	+	Petroselinum crispum	Light responsive element
CaTCP17::chr06:225340299-225342299	O2-site	GATGA(C/T)(A/G)TG(A/G)	457	8	-	Zea mays	zein metabolism regulation element
CaTCP17::chr06:225340299-225342299	LTR	CCGAAA	1793	6	+	Hordeum vulgare	Low temperature responsive element
CaTCP17::chr06:225340299-225342299	CGTCA-motif	CGTCA	1034	5	-	Hordeum vulgare	MeJA responsiveness element
CaTCP17::chr06:225340299-225342299	Box II	CCACGTGGC	731	9	-	Petroselinum crispum	part of a light responsive element
CaTCP17::chr06:225340299-225342299	G-Box	TCCACATGGCA	730	10	-	Triticum aestivum	Light responsive element
CaTCP17::chr06:225340299-225342299	GT1-motif	GGTTAA	279	6	+	Arabidopsis thaliana	light responsive element
CaTCP17::chr06:225340299-225342299	GT1-motif	GGTTAAT	566	7	+	Avena sativa	light responsive element
CaTCP18::chr07:229347268-229349268	HD-Zip 1	CAAT(A/T)ATTG	1013	8	-	Arabidopsis thaliana	mesophyll cells responsiveness element
CaTCP18::chr07:229347268-229349268	GT1-motif	GGTTAA	376	6	+	Arabidopsis thaliana	light responsive element
CaTCP18::chr07:229347268-229349268	AE-box	AGAAACAA	1818	8	-	Arabidopsis thaliana	Light responsive element
CaTCP18::chr07:229347268-229349268	CGTCA-motif	CGTCA	183	5	-	Hordeum vulgare	MeJA responsiveness element
CaTCP18::chr07:229347268-229349268	TCA-element	CCATCTTTTT	1296	9	+	Nicotiana tabacum	Salicylic acid responsive element
CaTCP18::chr07:229347268-229349268	ARE	AAACCA	1866	6	-	Zea mays	Anaerobic responsive element
CaTCP18::chr07:229347268-229349268	GATA-motif	GATAGGA	867	7	+	Arabidopsis thaliana	part of a light responsive element
CaTCP18::chr07:229347268-229349268	Box 4	ATTAAT	958	6	+	Petroselinum crispum	Light responsive element
CaTCP18::chr07:229347268-229349268	I-box	AGATAAGG	1154	8	-	Triticum aestivum	part of a light responsive element
CaTCP18::chr07:229347268-229349268	G-box	CACGTC	555	6	+	Zea mays	Light responsive element
CaTCP18::chr07:229347268-229349268	G-box	CACGAC	889	6	-	Zea mays	Light responsive element
CaTCP18::chr07:229347268-229349268	MRE	AACCTAA	292	7	+	Petroselinum crispum	light responsiveness element
CaTCP18::chr07:229347268-229349268	ABRE	ACGTG	555	5	-	Arabidopsis thaliana	Abscisic acid responsiveness
CaTCP18::chr07:229347268-229349268	TGACG-motif	TGACG	183	5	+	Hordeum vulgare	MeJA responsiveness element
CaTCP19::chr07:241293386-241295386	GT1-motif	GGTTAA	1123	6	+	Arabidopsis thaliana	light responsive element
CaTCP19::chr07:241293386-241295386	AAAC-motif	CAATCAAAACCT	1639	11	+	Spinacia oleracea	light responsive element
CaTCP19::chr07:241293386-241295386	Gap-box	CAAATGAA(A/G)A	352	9	-	Arabidopsis thaliana	part of a light responsive element
CaTCP19::chr07:241293386-241295386	AE-box	AGAAACAA	1007	8	+	Arabidopsis thaliana	Light responsive element
CaTCP19::chr07:241293386-241295386	TC-rich repeats	GTTTTCTTAC	1416	9	+	Nicotiana tabacum	defense and stress responsiveness element
CaTCP19::chr07:241293386-241295386	TCT-motif	TCTTAC	608	6	+	Arabidopsis thaliana	part of a light responsive element
CaTCP19::chr07:241293386-241295386	CAT-box	GCCACT	1401	6	-	Arabidopsis thaliana	meristem expression regulation element
CaTCP19::chr07:241293386-241295386	O2-site	GATGATGTGG	1338	9	+	Zea mays	zein metabolism regulation element
CaTCP19::chr07:241293386-241295386	ARE	AAACCA	1744	6	+	Zea mays	Anaerobic responsive element
CaTCP19::chr07:241293386-241295386	Box 4	ATTAAT	144	6	+	Petroselinum crispum	Light responsive element
CaTCP19::chr07:241293386-241295386	G-box	CACGAC	382	6	+	Zea mays	Light responsive element
CaTCP19::chr07:241293386-241295386	G-box	TACGTG	721	6	+	Arabidopsis thaliana	Light responsive element
CaTCP19::chr07:241293386-241295386	G-box	CAGACGTGGCA	1914	10	-	Nicotiana plumbaginifolia	Light responsive element
CaTCP19::chr07:241293386-241295386	ABRE	ACGTG	722	5	+	Arabidopsis thaliana	Abscisic acid responsiveness
CaTCP19::chr07:241293386-241295386	MBS	CAACTG	1910	6	-	Arabidopsis thaliana	Drought responsive element
CaTCP19::chr07:241293386-241295386	3-AF1 binding site	TAAGAGAGGAA	1001	10	+	Solanum tuberosum	light responsive element
CaTCP19::chr07:241293386-241295386	TATC-box	TATCCCA	1427	7	+	Oryza sativa	GA responsiveness element
CaTCP1::chr01:7330409-7332409	LTR	CCGAAA	968	6	-	Hordeum vulgare	Low temperature responsive element
CaTCP1::chr01:7330409-7332409	AT-rich element	ATAGAAATCAA	1435	10	+	Glycine max	binding protein
CaTCP1::chr01:7330409-7332409	circadian	CAAAGATATC	793	9	+	Lycopersicon esculentum	circadian control responsiveness element
CaTCP1::chr01:7330409-7332409	TCT-motif	TCTTAC	173	6	-	Arabidopsis thaliana	part of a light responsive element
CaTCP1::chr01:7330409-7332409	TC-rich repeats	GTTTTCTTAC	179	9	-	Nicotiana tabacum	defense and stress responsiveness element
CaTCP1::chr01:7330409-7332409	G-Box	CACGTG	168	6	+	Pisum sativum	Light responsive element
CaTCP1::chr01:7330409-7332409	AAAC-motif	CAATCAAAACCT	1902	11	+	Spinacia oleracea	light responsive element
CaTCP1::chr01:7330409-7332409	GT1-motif	GGTTAAT	1820	7	-	Avena sativa	light responsive element
CaTCP1::chr01:7330409-7332409	GT1-motif	GGTTAA	1821	6	-	Arabidopsis thaliana	light responsive element
CaTCP1::chr01:7330409-7332409	ABRE	CACGTG	168	6	+	Arabidopsis thaliana	Abscisic acid responsiveness
CaTCP1::chr01:7330409-7332409	ABRE	ACGTG	169	5	+	Arabidopsis thaliana	Abscisic acid responsiveness
CaTCP1::chr01:7330409-7332409	ATCT-motif	AATCTAATCC	899	9	-	Pisum sativum	Light responsive element
CaTCP1::chr01:7330409-7332409	MBS	CAACTG	1157	6	+	Arabidopsis thaliana	Drought responsive element
CaTCP1::chr01:7330409-7332409	G-box	ACACGTG(G/t)CACC	163	10.5	-	Lycopersicon esculentum	Light responsive element
CaTCP1::chr01:7330409-7332409	G-box	ACACGTGT	167	8	+	Brassica napus	Light responsive element
CaTCP1::chr01:7330409-7332409	I-box	AAGATAAGGCT	680	10	-	Gossypium hirsutum	part of a light responsive element
CaTCP1::chr01:7330409-7332409	I-box	AGATAAGG	682	8	-	Triticum aestivum	part of a light responsive element
CaTCP1::chr01:7330409-7332409	MRE	AACCTAA	1246	7	+	Petroselinum crispum	light responsiveness element
CaTCP1::chr01:7330409-7332409	ARE	AAACCA	1018	6	-	Zea mays	Anaerobic responsive element
CaTCP1::chr01:7330409-7332409	GATA-motif	AAGATAAGATT	680	10	-	Arabidopsis thaliana	part of a light responsive element
CaTCP1::chr01:7330409-7332409	Box 4	ATTAAT	486	6	+	Petroselinum crispum	Light responsive element
CaTCP20::chr08:54039395-54041395	TC-rich repeats	GTTTTCTTAC	1210	9	-	Nicotiana tabacum	defense and stress responsiveness element
CaTCP20::chr08:54039395-54041395	GT1-motif	GGTTAA	795	6	+	Arabidopsis thaliana	light responsive element
CaTCP20::chr08:54039395-54041395	GATA-motif	AAGATAAGATT	632	10	+	Arabidopsis thaliana	part of a light responsive element
CaTCP20::chr08:54039395-54041395	Box 4	ATTAAT	875	6	+	Petroselinum crispum	Light responsive element
CaTCP20::chr08:54039395-54041395	AE-box	AGAAACAA	782	8	+	Arabidopsis thaliana	Light responsive element
CaTCP20::chr08:54039395-54041395	ARE	AAACCA	70	6	+	Zea mays	Anaerobic responsive element
CaTCP20::chr08:54039395-54041395	TGA-element	AACGAC	605	6	-	Brassica oleracea	auxin-responsive element
CaTCP20::chr08:54039395-54041395	P-box	CCTTTTG	1889	7	+	Oryza sativa	Gibberellin responsive element
CaTCP21::chr08:54148526-54150526	ARE	AAACCA	108	6	+	Zea mays	Anaerobic responsive element
CaTCP21::chr08:54148526-54150526	Box 4	ATTAAT	1072	6	-	Petroselinum crispum	Light responsive element
CaTCP21::chr08:54148526-54150526	GATA-motif	GATAGGA	1473	7	-	Arabidopsis thaliana	part of a light responsive element
CaTCP21::chr08:54148526-54150526	I-box	AGATAAGG	610	8	+	Triticum aestivum	part of a light responsive element
CaTCP21::chr08:54148526-54150526	G-box	CACGAC	1635	6	-	Zea mays	Light responsive element
CaTCP21::chr08:54148526-54150526	G-box	CACGTG	1730	6	-	Arabidopsis thaliana	Light responsive element
CaTCP21::chr08:54148526-54150526	ABRE	CACGTG	1730	6	-	Arabidopsis thaliana	Abscisic acid responsiveness
CaTCP21::chr08:54148526-54150526	ABRE	ACGTG	1731	5	+	Arabidopsis thaliana	Abscisic acid responsiveness
CaTCP21::chr08:54148526-54150526	MBS	CAACTG	1154	6	+	Arabidopsis thaliana	Drought responsive element
CaTCP21::chr08:54148526-54150526	TGACG-motif	TGACG	1545	5	+	Hordeum vulgare	MeJA responsiveness element
CaTCP21::chr08:54148526-54150526	TATC-box	TATCCCA	1533	7	+	Oryza sativa	GA responsiveness element
CaTCP21::chr08:54148526-54150526	G-Box	CACGTT	1894	6	+	Pisum sativum	Light responsive element
CaTCP21::chr08:54148526-54150526	AE-box	AGAAACAA	1399	8	+	Arabidopsis thaliana	Light responsive element
CaTCP21::chr08:54148526-54150526	CGTCA-motif	CGTCA	1545	5	-	Hordeum vulgare	MeJA responsiveness element
CaTCP21::chr08:54148526-54150526	TCT-motif	TCTTAC	1612	6	-	Arabidopsis thaliana	part of a light responsive element
CaTCP21::chr08:54148526-54150526	TC-rich repeats	ATTCTCTAAC	1798	9	-	Nicotiana tabacum	defense and stress responsiveness element
CaTCP21::chr08:54148526-54150526	TC-rich repeats	GTTTTCTTAC	1842	9	+	Nicotiana tabacum	defense and stress responsiveness element
CaTCP21::chr08:54148526-54150526	AT-rich element	ATAGAAATCAA	1831	10	-	Glycine max	binding protein
CaTCP21::chr08:54148526-54150526	LTR	CCGAAA	1663	6	-	Hordeum vulgare	Low temperature responsive element
CaTCP21::chr08:54148526-54150526	TCA-element	TCAGAAGAGG	160	9	+	Brassica oleracea	Salicylic acid responsive element
CaTCP21::chr08:54148526-54150526	CAT-box	GCCACT	871	6	-	Arabidopsis thaliana	meristem expression regulation element
CaTCP22::chr08:879446-881446	AT1-motif	AATTATTTTTTATT	71	14	-	Solanum tuberosum	part of a light responsive module
CaTCP22::chr08:879446-881446	ABRE	ACGTG	1332	5	-	Arabidopsis thaliana	Abscisic acid responsiveness
CaTCP22::chr08:879446-881446	GC-motif	CCCCCG	1342	6	+	Zea mays	anoxic responsiveness element
CaTCP22::chr08:879446-881446	TGACG-motif	TGACG	770	5	-	Hordeum vulgare	MeJA responsiveness element
CaTCP22::chr08:879446-881446	AuxRR-core	GGTCCAT	212	7	-	Nicotiana tabacum	Auxin responsive element
CaTCP22::chr08:879446-881446	G-box	CACGTC	1332	6	+	Zea mays	Light responsive element
CaTCP22::chr08:879446-881446	L-box	ATCCCACCTAC	1910	10	+	Petroselinum crispum	part of a light responsive element
CaTCP22::chr08:879446-881446	GATA-motif	AAGATAAGATT	1558	10	+	Arabidopsis thaliana	part of a light responsive element
CaTCP22::chr08:879446-881446	LTR	CCGAAA	1699	6	+	Hordeum vulgare	Low temperature responsive element
CaTCP22::chr08:879446-881446	CGTCA-motif	CGTCA	770	5	+	Hordeum vulgare	MeJA responsiveness element
CaTCP22::chr08:879446-881446	TCT-motif	TCTTAC	849	6	-	Arabidopsis thaliana	part of a light responsive element
CaTCP22::chr08:879446-881446	TGA-element	AACGAC	1224	6	+	Brassica oleracea	auxin-responsive element
CaTCP22::chr08:879446-881446	AE-box	AGAAACAA	237	8	+	Arabidopsis thaliana	Light responsive element
CaTCP23::chr09:232795887-232797887	TCT-motif	TCTTAC	1369	6	-	Arabidopsis thaliana	part of a light responsive element
CaTCP23::chr09:232795887-232797887	CGTCA-motif	CGTCA	1190	5	+	Hordeum vulgare	MeJA responsiveness element
CaTCP23::chr09:232795887-232797887	circadian	CAAAGATATC	1563	9	+	Lycopersicon esculentum	circadian control responsiveness element
CaTCP23::chr09:232795887-232797887	AT-rich element	ATAGAAATCAA	616	10	+	Glycine max	binding protein
CaTCP23::chr09:232795887-232797887	CCAAT-box	CAACGG	167	6	+	Hordeum vulgare	MYB responsiveness element
CaTCP23::chr09:232795887-232797887	LAMP-element	CTTTATCA	233	8	-	Pisum sativum	part of a light responsive element
CaTCP23::chr09:232795887-232797887	AE-box	AGAAACAA	900	8	-	Arabidopsis thaliana	Light responsive element
CaTCP23::chr09:232795887-232797887	AE-box	AGAAACTT	1546	8	+	Arabidopsis thaliana	Light responsive element
CaTCP23::chr09:232795887-232797887	AAAC-motif	CAATCAAAACCT	302	11	-	Spinacia oleracea	light responsive element
CaTCP23::chr09:232795887-232797887	ACE	CTAACGTATT	732	9	+	Petroselinum crispum	light responsiveness element
CaTCP23::chr09:232795887-232797887	O2-site	GATGA(C/T)(A/G)TG(A/G)	1187	8	-	Zea mays	zein metabolism regulation element
CaTCP23::chr09:232795887-232797887	LTR	CCGAAA	20	6	-	Hordeum vulgare	Low temperature responsive element
CaTCP23::chr09:232795887-232797887	G-box	CACGTC	1188	6	+	Zea mays	Light responsive element
CaTCP23::chr09:232795887-232797887	ATC-motif	AGTAATCT	920	8	+	Spinacia oleracea	Light responsive element
CaTCP23::chr09:232795887-232797887	ARE	AAACCA	179	6	-	Zea mays	Anaerobic responsive element
CaTCP23::chr09:232795887-232797887	Box 4	ATTAAT	1374	6	-	Petroselinum crispum	Light responsive element
CaTCP23::chr09:232795887-232797887	GATA-motif	GATAGGG	96	7	+	Pisum sativum	part of a light responsive element
CaTCP23::chr09:232795887-232797887	GATA-motif	AAGGATAAGG	444	9	+	Solanum tuberosum	part of a light responsive element
CaTCP23::chr09:232795887-232797887	GATA-motif	GATAGGA	1143	7	-	Arabidopsis thaliana	part of a light responsive element
CaTCP23::chr09:232795887-232797887	AT1-motif	AATTATTTTTTATT	938	13	-	Solanum tuberosum	part of a light responsive module
CaTCP23::chr09:232795887-232797887	ABRE	ACGTG	1188	5	-	Arabidopsis thaliana	Abscisic acid responsiveness
CaTCP23::chr09:232795887-232797887	MBS	CAACTG	1254	6	-	Arabidopsis thaliana	Drought responsive element
CaTCP23::chr09:232795887-232797887	TGACG-motif	TGACG	1190	5	-	Hordeum vulgare	MeJA responsiveness element
CaTCP24::chr09:5610731-5612731	MBS	CAACTG	423	6	-	Arabidopsis thaliana	Drought responsive element
CaTCP24::chr09:5610731-5612731	TGACG-motif	TGACG	420	5	-	Hordeum vulgare	MeJA responsiveness element
CaTCP24::chr09:5610731-5612731	ABRE	ACGTG	418	5	-	Arabidopsis thaliana	Abscisic acid responsiveness
CaTCP24::chr09:5610731-5612731	GC-motif	CCCCCG	1175	6	-	Zea mays	anoxic responsiveness element
CaTCP24::chr09:5610731-5612731	Box 4	ATTAAT	1022	6	-	Petroselinum crispum	Light responsive element
CaTCP24::chr09:5610731-5612731	MBSI	TTTTTACGGTTA	1958	11	-	Petunia hybrida	MYB responsiveness element
CaTCP24::chr09:5610731-5612731	G-box	CACGTC	418	6	+	Zea mays	Light responsive element
CaTCP24::chr09:5610731-5612731	TCA-element	CCATCTTTTT	769	9	-	Nicotiana tabacum	Salicylic acid responsive element
CaTCP24::chr09:5610731-5612731	A-box	CCGTCC	1172	6	-	Petroselinum crispum	cis-acting regulatory element
CaTCP24::chr09:5610731-5612731	LTR	CCGAAA	1961	6	+	Hordeum vulgare	Low temperature responsive element
CaTCP24::chr09:5610731-5612731	O2-site	GATGACATGG	429	9	-	Zea mays	zein metabolism regulation element
CaTCP24::chr09:5610731-5612731	GT1-motif	GGTTAA	1555	6	-	Arabidopsis thaliana	light responsive element
CaTCP24::chr09:5610731-5612731	CGTCA-motif	CGTCA	420	5	+	Hordeum vulgare	MeJA responsiveness element
CaTCP25::chr11:26025596-26027596	HD-Zip 1	CAAT(A/T)ATTG	1598	8	-	Arabidopsis thaliana	mesophyll cells responsiveness element
CaTCP25::chr11:26025596-26027596	AE-box	AGAAACTT	788	8	-	Arabidopsis thaliana	Light responsive element
CaTCP25::chr11:26025596-26027596	TC-rich repeats	GTTTTCTTAC	2	9	-	Nicotiana tabacum	defense and stress responsiveness element
CaTCP25::chr11:26025596-26027596	TC-rich repeats	ATTCTCTAAC	164	9	+	Nicotiana tabacum	defense and stress responsiveness element
CaTCP25::chr11:26025596-26027596	GA-motif	ATAGATAA	152	8	-	Arabidopsis thaliana	part of a light responsive element
CaTCP25::chr11:26025596-26027596	TCT-motif	TCTTAC	2	6	-	Arabidopsis thaliana	part of a light responsive element
CaTCP25::chr11:26025596-26027596	GCN4_motif	TGAGTCA	810	7	+	Oryza sativa	endosperm expression regulation element
CaTCP25::chr11:26025596-26027596	Box 4	ATTAAT	1369	6	-	Petroselinum crispum	Light responsive element
CaTCP25::chr11:26025596-26027596	ABRE	GCAACGTGTC	1393	9	+	Hordeum vulgare	Abscisic acid responsiveness
CaTCP25::chr11:26025596-26027596	MBS	CAACTG	584	6	-	Arabidopsis thaliana	Drought responsive element
CaTCP26::chr11:8464880-8466880	ARE	AAACCA	6	6	-	Zea mays	Anaerobic responsive element
CaTCP26::chr11:8464880-8466880	GATA-motif	GATAGGA	1712	7	+	Arabidopsis thaliana	part of a light responsive element
CaTCP26::chr11:8464880-8466880	Box 4	ATTAAT	36	6	+	Petroselinum crispum	Light responsive element
CaTCP26::chr11:8464880-8466880	I-box	TGATAATGT	431	9	-	Solanum tuberosum	part of a light responsive element
CaTCP26::chr11:8464880-8466880	I-box	GTATAAGGCC	1744	9	-	Larix laricina	part of a light responsive element
CaTCP26::chr11:8464880-8466880	G-box	CTTCCACGTGGCA	715	12	+	Arabidopsis thaliana	Light responsive element
CaTCP26::chr11:8464880-8466880	G-box	tgACACGTGGCA	716	11	+	Lycopersicon esculentum	Light responsive element
CaTCP26::chr11:8464880-8466880	G-box	GCCACGTGGA	717	9	+	Arabidopsis thaliana	Light responsive element
CaTCP26::chr11:8464880-8466880	G-box	CACGTG	719	6	+	Arabidopsis thaliana	Light responsive element
CaTCP26::chr11:8464880-8466880	G-box	TACGTG	1425	6	+	Arabidopsis thaliana	Light responsive element
CaTCP26::chr11:8464880-8466880	MRE	AACCTAA	1487	7	-	Petroselinum crispum	light responsiveness element
CaTCP26::chr11:8464880-8466880	ABRE	GCCGCGTGGC	717	9	+	Oryza sativa	Abscisic acid responsiveness
CaTCP26::chr11:8464880-8466880	ABRE	CACGTG	719	6	+	Arabidopsis thaliana	Abscisic acid responsiveness
CaTCP26::chr11:8464880-8466880	ABRE	ACGTG	720	5	+	Arabidopsis thaliana	Abscisic acid responsiveness
CaTCP26::chr11:8464880-8466880	ABRE	GCAACGTGTC	1826	9	-	Hordeum vulgare	Abscisic acid responsiveness
CaTCP26::chr11:8464880-8466880	TGACG-motif	TGACG	459	5	+	Hordeum vulgare	MeJA responsiveness element
CaTCP26::chr11:8464880-8466880	G-Box	CACGTT	1061	6	+	Pisum sativum	Light responsive element
CaTCP26::chr11:8464880-8466880	GT1-motif	GGTTAA	1091	6	+	Arabidopsis thaliana	light responsive element
CaTCP26::chr11:8464880-8466880	AE-box	AGAAACAA	1277	8	-	Arabidopsis thaliana	Light responsive element
CaTCP26::chr11:8464880-8466880	circadian	CAAAGATATC	1014	9	-	Lycopersicon esculentum	circadian control responsiveness element
CaTCP26::chr11:8464880-8466880	Box II	CCACGTGGC	717	9	-	Petroselinum crispum	part of a light responsive element
CaTCP26::chr11:8464880-8466880	TC-rich repeats	GTTTTCTTAC	341	9	-	Nicotiana tabacum	defense and stress responsiveness element
CaTCP26::chr11:8464880-8466880	CGTCA-motif	CGTCA	459	5	-	Hordeum vulgare	MeJA responsiveness element
CaTCP26::chr11:8464880-8466880	TCT-motif	TCTTAC	341	6	-	Arabidopsis thaliana	part of a light responsive element
CaTCP27::PGAv.1.6.scaffold798:713482-715482	O2-site	GATGA(C/T)(A/G)TG(A/G)	1382	8	+	Zea mays	zein metabolism regulation element
CaTCP27::PGAv.1.6.scaffold798:713482-715482	AT-rich sequence	TAAAATACT	648	9	-	Pisum sativum	element for maximal elicitor-mediated activation (2copies)
CaTCP27::PGAv.1.6.scaffold798:713482-715482	chs-CMA2c	ATGTACGTGGAGG	848	12	+	Petroselinum crispum	part of a light responsive element
CaTCP27::PGAv.1.6.scaffold798:713482-715482	circadian	CAAAGATATC	337	9	-	Lycopersicon esculentum	circadian control responsiveness element
CaTCP27::PGAv.1.6.scaffold798:713482-715482	TC-rich repeats	ATTCTCTAAC	925	9	-	Nicotiana tabacum	defense and stress responsiveness element
CaTCP27::PGAv.1.6.scaffold798:713482-715482	TC-rich repeats	GTTTTCTTAC	1605	9	-	Nicotiana tabacum	defense and stress responsiveness element
CaTCP27::PGAv.1.6.scaffold798:713482-715482	CGTCA-motif	CGTCA	862	5	-	Hordeum vulgare	MeJA responsiveness element
CaTCP27::PGAv.1.6.scaffold798:713482-715482	TCT-motif	TCTTAC	1243	6	+	Arabidopsis thaliana	part of a light responsive element
CaTCP27::PGAv.1.6.scaffold798:713482-715482	LAMP-element	CTTTATCA	1534	8	+	Pisum sativum	part of a light responsive element
CaTCP27::PGAv.1.6.scaffold798:713482-715482	TGA-element	AACGAC	63	6	+	Brassica oleracea	auxin-responsive element
CaTCP27::PGAv.1.6.scaffold798:713482-715482	AE-box	AGAAACAA	978	8	+	Arabidopsis thaliana	Light responsive element
CaTCP27::PGAv.1.6.scaffold798:713482-715482	ABRE	ACGTG	852	5	+	Arabidopsis thaliana	Abscisic acid responsiveness
CaTCP27::PGAv.1.6.scaffold798:713482-715482	TGACG-motif	TGACG	862	5	+	Hordeum vulgare	MeJA responsiveness element
CaTCP27::PGAv.1.6.scaffold798:713482-715482	AACA_motif	TAACAAACTCCA	1537	11	+	Oryza sativa	involved in endosperm-specific negative expression
CaTCP27::PGAv.1.6.scaffold798:713482-715482	G-box	TACGTG	851	6	+	Arabidopsis thaliana	Light responsive element
CaTCP27::PGAv.1.6.scaffold798:713482-715482	GATA-motif	GATAGGA	1698	7	-	Arabidopsis thaliana	part of a light responsive element
CaTCP27::PGAv.1.6.scaffold798:713482-715482	Box 4	ATTAAT	21	6	+	Petroselinum crispum	Light responsive element
CaTCP2::chr02:114684471-114686471	Box 4	ATTAAT	329	6	+	Petroselinum crispum	Light responsive element
CaTCP2::chr02:114684471-114686471	chs-CMA1a	TTACTTAA	362	8	-	Daucus carota	part of a light responsive element
CaTCP2::chr02:114684471-114686471	ARE	AAACCA	1245	6	+	Zea mays	Anaerobic responsive element
CaTCP2::chr02:114684471-114686471	MRE	AACCTAA	1553	7	-	Petroselinum crispum	light responsiveness element
CaTCP2::chr02:114684471-114686471	ATCT-motif	AATCTAATCC	1550	9	-	Pisum sativum	Light responsive element
CaTCP2::chr02:114684471-114686471	TATC-box	TATCCCA	1536	7	-	Oryza sativa	GA responsiveness element
CaTCP2::chr02:114684471-114686471	TCCC-motif	TCTCCCT	1986	7	-	Spinacia oleracea	part of a light responsive element
CaTCP2::chr02:114684471-114686471	Sp1	GGGCGG	1296	6	-	Oryza sativa	light responsive element
CaTCP2::chr02:114684471-114686471	3-AF1 binding site	TAAGAGAGGAA	202	10	+	Solanum tuberosum	light responsive element
CaTCP2::chr02:114684471-114686471	chs-Unit 1 m1	ACCTAACCCGC	1289	10	+	Hordeum vulgare	part of a light responsive element
CaTCP2::chr02:114684471-114686471	TC-rich repeats	ATTCTCTAAC	1777	9	-	Nicotiana tabacum	defense and stress responsiveness element
CaTCP2::chr02:114684471-114686471	AT-rich element	ATAGAAATCAA	116	10	-	Glycine max	binding protein
CaTCP2::chr02:114684471-114686471	TCA-element	CCATCTTTTT	485	9	+	Nicotiana tabacum	Salicylic acid responsive element
CaTCP2::chr02:114684471-114686471	LTR	CCGAAA	472	6	-	Hordeum vulgare	Low temperature responsive element
CaTCP3::chr02:128951400-128953400	LTR	CCGAAA	1313	6	+	Hordeum vulgare	Low temperature responsive element
CaTCP3::chr02:128951400-128953400	TCA-element	CCATCTTTTT	471	10	-	Nicotiana tabacum	Salicylic acid responsive element
CaTCP3::chr02:128951400-128953400	CAT-box	GCCACT	85	6	+	Arabidopsis thaliana	meristem expression regulation element
CaTCP3::chr02:128951400-128953400	RY-element	CATGCATG	442	8	+	Helianthus annuus	seed-specific responsiveness element
CaTCP3::chr02:128951400-128953400	GT1-motif	GGTTAA	1686	6	-	Arabidopsis thaliana	light responsive element
CaTCP3::chr02:128951400-128953400	AE-box	AGAAACAA	1940	8	-	Arabidopsis thaliana	Light responsive element
CaTCP3::chr02:128951400-128953400	GA-motif	ATAGATAA	1245	8	+	Arabidopsis thaliana	part of a light responsive element
CaTCP3::chr02:128951400-128953400	TCT-motif	TCTTAC	1657	6	+	Arabidopsis thaliana	part of a light responsive element
CaTCP3::chr02:128951400-128953400	CCAAT-box	CAACGG	875	6	-	Hordeum vulgare	MYB responsiveness element
CaTCP3::chr02:128951400-128953400	MBS	CAACTG	66	6	+	Arabidopsis thaliana	Drought responsive element
CaTCP3::chr02:128951400-128953400	AT1-motif	AATTATTTTTTATT	1961	13	+	Solanum tuberosum	part of a light responsive module
CaTCP3::chr02:128951400-128953400	GATA-motif	GATAGGG	184	7	+	Pisum sativum	part of a light responsive element
CaTCP3::chr02:128951400-128953400	GATA-motif	AAGATAAGATT	561	10	-	Arabidopsis thaliana	part of a light responsive element
CaTCP3::chr02:128951400-128953400	Box 4	ATTAAT	1477	6	-	Petroselinum crispum	Light responsive element
CaTCP3::chr02:128951400-128953400	I-box	AAGATAAGGCT	674	10	+	Gossypium hirsutum	part of a light responsive element
CaTCP3::chr02:128951400-128953400	ATC-motif	AGTAATCT	19	8	+	Spinacia oleracea	Light responsive element
CaTCP3::chr02:128951400-128953400	MBSI	aaaAaaC(G/C)GTTA	1859	11	+	Petunia hybrida	MYB responsiveness element
CaTCP3::chr02:128951400-128953400	MRE	AACCTAA	1072	7	+	Petroselinum crispum	light responsiveness element
CaTCP4::chr02:162278087-162280087	LTR	CCGAAA	95	6	-	Hordeum vulgare	Low temperature responsive element
CaTCP4::chr02:162278087-162280087	P-box	CCTTTTG	458	7	+	Oryza sativa	Gibberellin responsive element
CaTCP4::chr02:162278087-162280087	Gap-box	CAAATGAA(A/G)A	6	9.5	+	Arabidopsis thaliana	part of a light responsive element
CaTCP4::chr02:162278087-162280087	TGA-element	AACGAC	1770	6	-	Brassica oleracea	auxin-responsive element
CaTCP4::chr02:162278087-162280087	ABRE	ACGTG	208	5	+	Arabidopsis thaliana	Abscisic acid responsiveness
CaTCP4::chr02:162278087-162280087	GC-motif	CCCCCG	165	6	+	Zea mays	anoxic responsiveness element
CaTCP4::chr02:162278087-162280087	Box 4	ATTAAT	126	6	+	Petroselinum crispum	Light responsive element
CaTCP4::chr02:162278087-162280087	ARE	AAACCA	964	6	-	Zea mays	Anaerobic responsive element
CaTCP4::chr02:162278087-162280087	CAT-box	GCCACT	410	6	-	Arabidopsis thaliana	meristem expression regulation element
CaTCP4::chr02:162278087-162280087	AE-box	AGAAACAA	595	8	-	Arabidopsis thaliana	Light responsive element
CaTCP4::chr02:162278087-162280087	AE-box	AGAAACTT	1893	8	+	Arabidopsis thaliana	Light responsive element
CaTCP4::chr02:162278087-162280087	G-Box	CACGTT	909	6	+	Pisum sativum	Light responsive element
CaTCP4::chr02:162278087-162280087	CGTCA-motif	CGTCA	719	5	-	Hordeum vulgare	MeJA responsiveness element
CaTCP4::chr02:162278087-162280087	TCT-motif	TCTTAC	768	6	+	Arabidopsis thaliana	part of a light responsive element
CaTCP4::chr02:162278087-162280087	AT-rich element	ATAGAAATCAA	750	10	-	Glycine max	binding protein
CaTCP4::chr02:162278087-162280087	MBS	CAACTG	1328	6	+	Arabidopsis thaliana	Drought responsive element
CaTCP4::chr02:162278087-162280087	TGACG-motif	TGACG	719	5	+	Hordeum vulgare	MeJA responsiveness element
CaTCP4::chr02:162278087-162280087	AuxRR-core	GGTCCAT	1211	7	+	Nicotiana tabacum	Auxin responsive element
CaTCP4::chr02:162278087-162280087	TATC-box	TATCCCA	19	7	+	Oryza sativa	GA responsiveness element
CaTCP4::chr02:162278087-162280087	Sp1	GGGCGG	1365	6	-	Oryza sativa	light responsive element
CaTCP4::chr02:162278087-162280087	GARE-motif	TCTGTTG	309	7	-	Brassica oleracea	Gibberellin responsive element
CaTCP4::chr02:162278087-162280087	G-box	CACGTC	207	6	-	Zea mays	Light responsive element
CaTCP4::chr02:162278087-162280087	G-box	TACGTG	500	6	+	Arabidopsis thaliana	Light responsive element
CaTCP5::chr02:163920300-163922300	Box 4	ATTAAT	900	6	+	Petroselinum crispum	Light responsive element
CaTCP5::chr02:163920300-163922300	ARE	AAACCA	722	6	-	Zea mays	Anaerobic responsive element
CaTCP5::chr02:163920300-163922300	MRE	AACCTAA	1960	7	+	Petroselinum crispum	light responsiveness element
CaTCP5::chr02:163920300-163922300	G-box	CACGTC	973	6	+	Zea mays	Light responsive element
CaTCP5::chr02:163920300-163922300	G-box	TAACACGTAG	1572	9	-	Brassica oleracea	Light responsive element
CaTCP5::chr02:163920300-163922300	TGACG-motif	TGACG	975	5	-	Hordeum vulgare	MeJA responsiveness element
CaTCP5::chr02:163920300-163922300	ABRE	ACGTG	973	5	-	Arabidopsis thaliana	Abscisic acid responsiveness
CaTCP5::chr02:163920300-163922300	ABRE	GCAACGTGTC	1571	9	+	Hordeum vulgare	Abscisic acid responsiveness
CaTCP5::chr02:163920300-163922300	chs-CMA2a	TCACTTGA	551	8	-	Petroselinum crispum	part of a light responsive element
CaTCP5::chr02:163920300-163922300	G-Box	CACGTT	1573	6	-	Pisum sativum	Light responsive element
CaTCP5::chr02:163920300-163922300	HD-Zip 1	CAAT(A/T)ATTG	376	8.5	+	Arabidopsis thaliana	mesophyll cells responsiveness element
CaTCP5::chr02:163920300-163922300	CGTCA-motif	CGTCA	975	5	+	Hordeum vulgare	MeJA responsiveness element
CaTCP5::chr02:163920300-163922300	TC-rich repeats	ATTCTCTAAC	119	9	-	Nicotiana tabacum	defense and stress responsiveness element
CaTCP5::chr02:163920300-163922300	TCA-element	CCATCTTTTT	1072	9	-	Nicotiana tabacum	Salicylic acid responsive element
CaTCP5::chr02:163920300-163922300	AT-rich sequence	TAAAATACT	110	9	+	Pisum sativum	element for maximal elicitor-mediated activation (2copies)
CaTCP5::chr02:163920300-163922300	CAT-box	GCCACT	387	6	-	Arabidopsis thaliana	meristem expression regulation element
CaTCP5::chr02:163920300-163922300	O2-site	GTTGACGTGA	972	9	-	Zea mays	zein metabolism regulation element
CaTCP6::chr02:168922511-168924511	3-AF1 binding site	TAAGAGAGGAA	1401	10	+	Solanum tuberosum	light responsive element
CaTCP6::chr02:168922511-168924511	Sp1	GGGCGG	1180	6	-	Oryza sativa	light responsive element
CaTCP6::chr02:168922511-168924511	ABRE	ACGTG	73	5	+	Arabidopsis thaliana	Abscisic acid responsiveness
CaTCP6::chr02:168922511-168924511	ATCT-motif	AATCTAATCC	28	9	-	Pisum sativum	Light responsive element
CaTCP6::chr02:168922511-168924511	TGACG-motif	TGACG	556	5	+	Hordeum vulgare	MeJA responsiveness element
CaTCP6::chr02:168922511-168924511	MBS	CAACTG	1075	6	+	Arabidopsis thaliana	Drought responsive element
CaTCP6::chr02:168922511-168924511	G-box	CACGTC	72	6	-	Zea mays	Light responsive element
CaTCP6::chr02:168922511-168924511	G-box	CACGAC	816	6	+	Zea mays	Light responsive element
CaTCP6::chr02:168922511-168924511	G-box	TACGTG	824	6	-	Arabidopsis thaliana	Light responsive element
CaTCP6::chr02:168922511-168924511	GARE-motif	TCTGTTG	751	7	-	Brassica oleracea	Gibberellin responsive element
CaTCP6::chr02:168922511-168924511	Box 4	ATTAAT	957	6	+	Petroselinum crispum	Light responsive element
CaTCP6::chr02:168922511-168924511	CAT-box	GCCACT	1773	6	-	Arabidopsis thaliana	meristem expression regulation element
CaTCP6::chr02:168922511-168924511	LTR	CCGAAA	1243	6	+	Hordeum vulgare	Low temperature responsive element
CaTCP6::chr02:168922511-168924511	CGTCA-motif	CGTCA	556	5	-	Hordeum vulgare	MeJA responsiveness element
CaTCP6::chr02:168922511-168924511	TCT-motif	TCTTAC	612	6	-	Arabidopsis thaliana	part of a light responsive element
CaTCP6::chr02:168922511-168924511	TC-rich repeats	ATTCTCTAAC	644	9	-	Nicotiana tabacum	defense and stress responsiveness element
CaTCP6::chr02:168922511-168924511	CCAAT-box	CAACGG	247	6	+	Hordeum vulgare	MYB responsiveness element
CaTCP6::chr02:168922511-168924511	G-Box	CACGTT	810	6	+	Pisum sativum	Light responsive element
CaTCP6::chr02:168922511-168924511	TGA-element	AACGAC	381	6	+	Brassica oleracea	auxin-responsive element
CaTCP6::chr02:168922511-168924511	GT1-motif	GGTTAA	578	6	+	Arabidopsis thaliana	light responsive element
CaTCP6::chr02:168922511-168924511	Gap-box	CAAATGAA(A/G)A	1480	9.5	-	Arabidopsis thaliana	part of a light responsive element
CaTCP7::chr02:99916177-99918177	G-box	TACGTG	1271	6	-	Arabidopsis thaliana	Light responsive element
CaTCP7::chr02:99916177-99918177	G-box	CAGACGTGGCA	1317	10	+	Nicotiana plumbaginifolia	Light responsive element
CaTCP7::chr02:99916177-99918177	G-box	CACGTC	1319	6	-	Zea mays	Light responsive element
CaTCP7::chr02:99916177-99918177	G-box	CACGAC	1474	6	+	Zea mays	Light responsive element
CaTCP7::chr02:99916177-99918177	Box 4	ATTAAT	270	6	+	Petroselinum crispum	Light responsive element
CaTCP7::chr02:99916177-99918177	ARE	AAACCA	113	6	+	Zea mays	Anaerobic responsive element
CaTCP7::chr02:99916177-99918177	ABRE	ACGTG	1271	5	-	Arabidopsis thaliana	Abscisic acid responsiveness
CaTCP7::chr02:99916177-99918177	TCT-motif	TCTTAC	108	6	-	Arabidopsis thaliana	part of a light responsive element
CaTCP7::chr02:99916177-99918177	TC-rich repeats	GTTTTCTTAC	108	9	-	Nicotiana tabacum	defense and stress responsiveness element
CaTCP7::chr02:99916177-99918177	TC-rich repeats	ATTCTCTAAC	1420	9	+	Nicotiana tabacum	defense and stress responsiveness element
CaTCP7::chr02:99916177-99918177	circadian	CAAAGATATC	390	9	-	Lycopersicon esculentum	circadian control responsiveness element
CaTCP7::chr02:99916177-99918177	ACA-motif	AATCACAACCATA	1112	13	-	Arabidopsis thaliana	light responsiveness element
CaTCP7::chr02:99916177-99918177	O2-site	GATGATGTGG	362	9	-	Zea mays	zein metabolism regulation element
CaTCP7::chr02:99916177-99918177	ACE	GACACGTATG	1317	9	-	Petroselinum crispum	light responsiveness element
CaTCP7::chr02:99916177-99918177	TCA-element	CCATCTTTTT	116	9	+	Nicotiana tabacum	Salicylic acid responsive element
CaTCP7::chr02:99916177-99918177	LTR	CCGAAA	1235	6	-	Hordeum vulgare	Low temperature responsive element
CaTCP8::chr03:217429934-217431934	AE-box	AGAAACAA	973	8	+	Arabidopsis thaliana	Light responsive element
CaTCP8::chr03:217429934-217431934	GT1-motif	GGTTAA	1888	6	-	Arabidopsis thaliana	light responsive element
CaTCP8::chr03:217429934-217431934	G-Box	CACGTG	1873	6	-	Pisum sativum	Light responsive element
CaTCP8::chr03:217429934-217431934	LAMP-element	CTTTATCA	1153	8	-	Pisum sativum	part of a light responsive element
CaTCP8::chr03:217429934-217431934	CCAAT-box	CAACGG	786	6	+	Hordeum vulgare	MYB responsiveness element
CaTCP8::chr03:217429934-217431934	GA-motif	ATAGATAA	766	8	-	Arabidopsis thaliana	part of a light responsive element
CaTCP8::chr03:217429934-217431934	TCT-motif	TCTTAC	1015	6	+	Arabidopsis thaliana	part of a light responsive element
CaTCP8::chr03:217429934-217431934	CGTCA-motif	CGTCA	1472	5	-	Hordeum vulgare	MeJA responsiveness element
CaTCP8::chr03:217429934-217431934	TC-rich repeats	ATTCTCTAAC	1351	9	-	Nicotiana tabacum	defense and stress responsiveness element
CaTCP8::chr03:217429934-217431934	TCA-element	CCATCTTTTT	446	9	-	Nicotiana tabacum	Salicylic acid responsive element
CaTCP8::chr03:217429934-217431934	GCN4_motif	TGAGTCA	28	7	+	Oryza sativa	endosperm expression regulation element
CaTCP8::chr03:217429934-217431934	GTGGC-motif	CATCGTGTGGC	329	10	+	Arabidopsis thaliana	part of a light responsive element
CaTCP8::chr03:217429934-217431934	ACE	CTAACGTATT	1346	9	-	Petroselinum crispum	light responsiveness element
CaTCP8::chr03:217429934-217431934	Box 4	ATTAAT	1380	6	-	Petroselinum crispum	Light responsive element
CaTCP8::chr03:217429934-217431934	GARE-motif	TCTGTTG	469	7	-	Brassica oleracea	Gibberellin responsive element
CaTCP8::chr03:217429934-217431934	G-box	CACGTC	1473	6	-	Zea mays	Light responsive element
CaTCP8::chr03:217429934-217431934	TGACG-motif	TGACG	1472	5	+	Hordeum vulgare	MeJA responsiveness element
CaTCP8::chr03:217429934-217431934	ABRE	ACGTG	1474	5	+	Arabidopsis thaliana	Abscisic acid responsiveness
CaTCP8::chr03:217429934-217431934	ABRE	CACGTG	1873	6	-	Arabidopsis thaliana	Abscisic acid responsiveness
CaTCP8::chr03:217429934-217431934	AuxRE	TGTCTCAATAAG	1250	11	-	Glycine max	part of an auxin-responsive element
CaTCP8::chr03:217429934-217431934	chs-CMA2a	TCACTTGA	481	8	-	Petroselinum crispum	part of a light responsive element
CaTCP9::chr03:271420278-271422278	CAT-box	GCCACT	1973	6	+	Arabidopsis thaliana	meristem expression regulation element
CaTCP9::chr03:271420278-271422278	G-Box	CACGTG	700	6	+	Pisum sativum	Light responsive element
CaTCP9::chr03:271420278-271422278	TGA-element	AACGAC	13	6	-	Brassica oleracea	auxin-responsive element
CaTCP9::chr03:271420278-271422278	GT1-motif	GGTTAA	1036	6	-	Arabidopsis thaliana	light responsive element
CaTCP9::chr03:271420278-271422278	AE-box	AGAAACAA	575	8	+	Arabidopsis thaliana	Light responsive element
CaTCP9::chr03:271420278-271422278	Box II	CCACGTGGC	698	9	-	Petroselinum crispum	part of a light responsive element
CaTCP9::chr03:271420278-271422278	GA-motif	ATAGATAA	1815	8	+	Arabidopsis thaliana	part of a light responsive element
CaTCP9::chr03:271420278-271422278	CGTCA-motif	CGTCA	153	5	+	Hordeum vulgare	MeJA responsiveness element
CaTCP9::chr03:271420278-271422278	TCT-motif	TCTTAC	510	6	+	Arabidopsis thaliana	part of a light responsive element
CaTCP9::chr03:271420278-271422278	ABRE	GCCGCGTGGC	698	9	+	Oryza sativa	Abscisic acid responsiveness
CaTCP9::chr03:271420278-271422278	ABRE	CACGTG	700	6	+	Arabidopsis thaliana	Abscisic acid responsiveness
CaTCP9::chr03:271420278-271422278	ABRE	ACGTG	701	5	+	Arabidopsis thaliana	Abscisic acid responsiveness
CaTCP9::chr03:271420278-271422278	ABRE	TACGTGTC	721	8	-	Oryza sativa	Abscisic acid responsiveness
CaTCP9::chr03:271420278-271422278	TGACG-motif	TGACG	153	5	-	Hordeum vulgare	MeJA responsiveness element
CaTCP9::chr03:271420278-271422278	3-AF1 binding site	TAAGAGAGGAA	664	10	+	Solanum tuberosum	light responsive element
CaTCP9::chr03:271420278-271422278	TATC-box	TATCCCA	1838	7	+	Oryza sativa	GA responsiveness element
CaTCP9::chr03:271420278-271422278	ARE	AAACCA	275	6	+	Zea mays	Anaerobic responsive element
CaTCP9::chr03:271420278-271422278	Box 4	ATTAAT	323	6	+	Petroselinum crispum	Light responsive element
CaTCP9::chr03:271420278-271422278	G-box	GCCACGTGGA	698	9	+	Arabidopsis thaliana	Light responsive element
CaTCP9::chr03:271420278-271422278	G-box	TACGTG	723	6	-	Arabidopsis thaliana	Light responsive element
CaTCP9::chr03:271420278-271422278	MRE	AACCTAA	402	7	-	Petroselinum crispum	light responsiveness element
CaTCP10::chr03:273299638-273301638	AE-box	AGAAACAA	1948	8	+	Arabidopsis thaliana	Light responsive element
CaTCP10::chr03:273299638-273301638	G-box	CACGTG	1204	6	-	Arabidopsis thaliana	Light responsive element
CaTCP10::chr03:273299638-273301638	AuxRR-core	GGTCCAT	1146	7	-	Nicotiana tabacum	Auxin responsive element
CaTCP11::chr03:279071602-279073602	P-box	CCTTTTG	1876	7	+	Oryza sativa	Gibberellin responsive element
CaTCP11::chr03:279071602-279073602	MBS	CAACTG	1318	6	-	Arabidopsis thaliana	Drought responsive element
CaTCP11::chr03:279071602-279073602	ABRE	ACGTG	1244	5	+	Arabidopsis thaliana	Abscisic acid responsiveness
CaTCP11::chr03:279071602-279073602	G-box	CACGTG	1243	6	-	Arabidopsis thaliana	Light responsive element
CaTCP12::chr05:165110101-165112101	Box 4	ATTAAT	430	6	+	Petroselinum crispum	Light responsive element
CaTCP12::chr05:165110101-165112101	Box 4	ATTAAT	949	6	+	Petroselinum crispum	Light responsive element
CaTCP12::chr05:165110101-165112101	GATA-motif	AAGGATAAGG	1120	9	-	Solanum tuberosum	part of a light responsive element
CaTCP12::chr05:165110101-165112101	G-Box	CACGTG	1499	6	-	Pisum sativum	Light responsive element
CaTCP14::chr06:206946554-206948554	TGACG-motif	TGACG	863	5	-	Hordeum vulgare	MeJA responsiveness element
CaTCP14::chr06:206946554-206948554	CGTCA-motif	CGTCA	863	5	+	Hordeum vulgare	MeJA responsiveness element
CaTCP15::chr06:223327428-223329428	GATA-motif	GATAGGG	1450	7	-	Pisum sativum	part of a light responsive element
CaTCP15::chr06:223327428-223329428	Box 4	ATTAAT	886	6	+	Petroselinum crispum	Light responsive element
CaTCP15::chr06:223327428-223329428	Box 4	ATTAAT	1867	6	-	Petroselinum crispum	Light responsive element
CaTCP15::chr06:223327428-223329428	Box 4	ATTAAT	1896	6	-	Petroselinum crispum	Light responsive element
CaTCP15::chr06:223327428-223329428	G-box	CACGTG	1364	6	-	Arabidopsis thaliana	Light responsive element
CaTCP16::chr06:223883640-223885640	MBS	CAACTG	1984	6	-	Arabidopsis thaliana	Drought responsive element
CaTCP16::chr06:223883640-223885640	MRE	AACCTAA	554	7	+	Petroselinum crispum	light responsiveness element
CaTCP16::chr06:223883640-223885640	Box 4	ATTAAT	174	6	+	Petroselinum crispum	Light responsive element
CaTCP16::chr06:223883640-223885640	Box 4	ATTAAT	1023	6	-	Petroselinum crispum	Light responsive element
CaTCP16::chr06:223883640-223885640	Box 4	ATTAAT	1482	6	-	Petroselinum crispum	Light responsive element
CaTCP16::chr06:223883640-223885640	Box 4	ATTAAT	1737	6	-	Petroselinum crispum	Light responsive element
CaTCP16::chr06:223883640-223885640	circadian	CAAAGATATC	500	9	+	Lycopersicon esculentum	circadian control responsiveness element
CaTCP16::chr06:223883640-223885640	TCT-motif	TCTTAC	1004	6	-	Arabidopsis thaliana	part of a light responsive element
CaTCP16::chr06:223883640-223885640	TCT-motif	TCTTAC	1310	6	-	Arabidopsis thaliana	part of a light responsive element
CaTCP16::chr06:223883640-223885640	GT1-motif	GGTTAAT	775	7	+	Avena sativa	light responsive element
CaTCP17::chr06:225340299-225342299	ABRE	CACGTG	1282	6	-	Arabidopsis thaliana	Abscisic acid responsiveness
CaTCP17::chr06:225340299-225342299	ABRE	ACGTG	1283	5	+	Arabidopsis thaliana	Abscisic acid responsiveness
CaTCP17::chr06:225340299-225342299	G-box	CACGTG	1282	6	-	Arabidopsis thaliana	Light responsive element
CaTCP17::chr06:225340299-225342299	G-box	CACGAC	1508	6	+	Zea mays	Light responsive element
CaTCP17::chr06:225340299-225342299	G-Box	CACGTG	733	6	+	Pisum sativum	Light responsive element
CaTCP17::chr06:225340299-225342299	G-Box	CACGTG	1282	6	-	Pisum sativum	Light responsive element
CaTCP18::chr07:229347268-229349268	HD-Zip 1	CAAT(A/T)ATTG	1651	8	-	Arabidopsis thaliana	mesophyll cells responsiveness element
CaTCP18::chr07:229347268-229349268	GT1-motif	GGTTAA	1329	6	+	Arabidopsis thaliana	light responsive element
CaTCP18::chr07:229347268-229349268	Box 4	ATTAAT	1417	6	-	Petroselinum crispum	Light responsive element
CaTCP18::chr07:229347268-229349268	MRE	AACCTAA	354	7	-	Petroselinum crispum	light responsiveness element
CaTCP18::chr07:229347268-229349268	MRE	AACCTAA	706	7	-	Petroselinum crispum	light responsiveness element
CaTCP19::chr07:241293386-241295386	Gap-box	CAAATGAA(A/G)A	896	9.5	-	Arabidopsis thaliana	part of a light responsive element
CaTCP19::chr07:241293386-241295386	TCT-motif	TCTTAC	1396	6	-	Arabidopsis thaliana	part of a light responsive element
CaTCP19::chr07:241293386-241295386	TCT-motif	TCTTAC	1420	6	+	Arabidopsis thaliana	part of a light responsive element
CaTCP19::chr07:241293386-241295386	Box 4	ATTAAT	216	6	+	Petroselinum crispum	Light responsive element
CaTCP19::chr07:241293386-241295386	Box 4	ATTAAT	374	6	+	Petroselinum crispum	Light responsive element
CaTCP19::chr07:241293386-241295386	Box 4	ATTAAT	932	6	+	Petroselinum crispum	Light responsive element
CaTCP19::chr07:241293386-241295386	Box 4	ATTAAT	1447	6	-	Petroselinum crispum	Light responsive element
CaTCP1::chr01:7330409-7332409	TCT-motif	TCTTAC	179	6	-	Arabidopsis thaliana	part of a light responsive element
CaTCP1::chr01:7330409-7332409	TCT-motif	TCTTAC	252	6	-	Arabidopsis thaliana	part of a light responsive element
CaTCP1::chr01:7330409-7332409	TCT-motif	TCTTAC	687	6	+	Arabidopsis thaliana	part of a light responsive element
CaTCP1::chr01:7330409-7332409	TC-rich repeats	GTTTTCTTAC	252	9	-	Nicotiana tabacum	defense and stress responsiveness element
CaTCP1::chr01:7330409-7332409	G-box	CACGTG	168	6	+	Arabidopsis thaliana	Light responsive element
CaTCP1::chr01:7330409-7332409	ARE	AAACCA	1908	6	+	Zea mays	Anaerobic responsive element
CaTCP1::chr01:7330409-7332409	GATA-motif	AAGATAAGATT	1979	10	+	Arabidopsis thaliana	part of a light responsive element
CaTCP1::chr01:7330409-7332409	Box 4	ATTAAT	527	6	+	Petroselinum crispum	Light responsive element
CaTCP1::chr01:7330409-7332409	Box 4	ATTAAT	770	6	+	Petroselinum crispum	Light responsive element
CaTCP1::chr01:7330409-7332409	Box 4	ATTAAT	803	6	+	Petroselinum crispum	Light responsive element
CaTCP1::chr01:7330409-7332409	Box 4	ATTAAT	837	6	+	Petroselinum crispum	Light responsive element
CaTCP20::chr08:54039395-54041395	GT1-motif	GGTTAA	1948	6	+	Arabidopsis thaliana	light responsive element
CaTCP20::chr08:54039395-54041395	ARE	AAACCA	674	6	+	Zea mays	Anaerobic responsive element
CaTCP21::chr08:54148526-54150526	ARE	AAACCA	251	6	-	Zea mays	Anaerobic responsive element
CaTCP21::chr08:54148526-54150526	Box 4	ATTAAT	1602	6	-	Petroselinum crispum	Light responsive element
CaTCP21::chr08:54148526-54150526	ABRE	ACGTG	1894	5	-	Arabidopsis thaliana	Abscisic acid responsiveness
CaTCP21::chr08:54148526-54150526	G-Box	CACGTG	1730	6	-	Pisum sativum	Light responsive element
CaTCP21::chr08:54148526-54150526	TCT-motif	TCTTAC	1915	6	-	Arabidopsis thaliana	part of a light responsive element
CaTCP21::chr08:54148526-54150526	CAT-box	GCCACT	1645	6	+	Arabidopsis thaliana	meristem expression regulation element
CaTCP22::chr08:879446-881446	ABRE	ACGTG	1643	5	-	Arabidopsis thaliana	Abscisic acid responsiveness
CaTCP22::chr08:879446-881446	G-box	CACGTC	1643	6	+	Zea mays	Light responsive element
CaTCP22::chr08:879446-881446	TCT-motif	TCTTAC	933	6	-	Arabidopsis thaliana	part of a light responsive element
CaTCP22::chr08:879446-881446	TCT-motif	TCTTAC	1040	6	-	Arabidopsis thaliana	part of a light responsive element
CaTCP22::chr08:879446-881446	TCT-motif	TCTTAC	1355	6	-	Arabidopsis thaliana	part of a light responsive element
CaTCP22::chr08:879446-881446	TCT-motif	TCTTAC	1455	6	-	Arabidopsis thaliana	part of a light responsive element
CaTCP22::chr08:879446-881446	TCT-motif	TCTTAC	1666	6	-	Arabidopsis thaliana	part of a light responsive element
CaTCP22::chr08:879446-881446	TCT-motif	TCTTAC	1755	6	-	Arabidopsis thaliana	part of a light responsive element
CaTCP23::chr09:232795887-232797887	circadian	CAAAGATATC	1567	9	-	Lycopersicon esculentum	circadian control responsiveness element
CaTCP23::chr09:232795887-232797887	O2-site	GATGA(C/T)(A/G)TG(A/G)	1603	8	+	Zea mays	zein metabolism regulation element
CaTCP23::chr09:232795887-232797887	ARE	AAACCA	1090	6	-	Zea mays	Anaerobic responsive element
CaTCP23::chr09:232795887-232797887	ARE	AAACCA	1426	6	+	Zea mays	Anaerobic responsive element
CaTCP24::chr09:5610731-5612731	TGACG-motif	TGACG	443	5	-	Hordeum vulgare	MeJA responsiveness element
CaTCP24::chr09:5610731-5612731	ABRE	ACGTG	441	5	-	Arabidopsis thaliana	Abscisic acid responsiveness
CaTCP24::chr09:5610731-5612731	G-box	CACGTC	441	6	+	Zea mays	Light responsive element
CaTCP24::chr09:5610731-5612731	CGTCA-motif	CGTCA	443	5	+	Hordeum vulgare	MeJA responsiveness element
CaTCP25::chr11:26025596-26027596	Box 4	ATTAAT	1864	6	-	Petroselinum crispum	Light responsive element
CaTCP26::chr11:8464880-8466880	Box 4	ATTAAT	880	6	+	Petroselinum crispum	Light responsive element
CaTCP26::chr11:8464880-8466880	MRE	AACCTAA	1657	7	-	Petroselinum crispum	light responsiveness element
CaTCP26::chr11:8464880-8466880	ABRE	ACGTG	1061	5	-	Arabidopsis thaliana	Abscisic acid responsiveness
CaTCP26::chr11:8464880-8466880	ABRE	ACGTG	1426	5	+	Arabidopsis thaliana	Abscisic acid responsiveness
CaTCP26::chr11:8464880-8466880	ABRE	ACGTG	1828	5	-	Arabidopsis thaliana	Abscisic acid responsiveness
CaTCP26::chr11:8464880-8466880	G-Box	CACGTG	719	6	+	Pisum sativum	Light responsive element
CaTCP26::chr11:8464880-8466880	G-Box	CACGTT	1828	6	+	Pisum sativum	Light responsive element
CaTCP26::chr11:8464880-8466880	Box II	CCACGTGGC	718	9	+	Petroselinum crispum	part of a light responsive element
CaTCP26::chr11:8464880-8466880	TCT-motif	TCTTAC	427	6	+	Arabidopsis thaliana	part of a light responsive element
CaTCP27::PGAv.1.6.scaffold798:713482-715482	circadian	CAAAGATATC	866	9	-	Lycopersicon esculentum	circadian control responsiveness element
CaTCP27::PGAv.1.6.scaffold798:713482-715482	circadian	CAAAGATATC	1472	9	+	Lycopersicon esculentum	circadian control responsiveness element
CaTCP27::PGAv.1.6.scaffold798:713482-715482	TCT-motif	TCTTAC	1703	6	+	Arabidopsis thaliana	part of a light responsive element
CaTCP27::PGAv.1.6.scaffold798:713482-715482	Box 4	ATTAAT	25	6	+	Petroselinum crispum	Light responsive element
CaTCP27::PGAv.1.6.scaffold798:713482-715482	Box 4	ATTAAT	138	6	+	Petroselinum crispum	Light responsive element
CaTCP27::PGAv.1.6.scaffold798:713482-715482	Box 4	ATTAAT	159	6	+	Petroselinum crispum	Light responsive element
CaTCP27::PGAv.1.6.scaffold798:713482-715482	Box 4	ATTAAT	183	6	+	Petroselinum crispum	Light responsive element
CaTCP27::PGAv.1.6.scaffold798:713482-715482	Box 4	ATTAAT	662	6	+	Petroselinum crispum	Light responsive element
CaTCP27::PGAv.1.6.scaffold798:713482-715482	Box 4	ATTAAT	743	6	+	Petroselinum crispum	Light responsive element
CaTCP27::PGAv.1.6.scaffold798:713482-715482	Box 4	ATTAAT	1445	6	-	Petroselinum crispum	Light responsive element
CaTCP2::chr02:114684471-114686471	Box 4	ATTAAT	377	6	+	Petroselinum crispum	Light responsive element
CaTCP2::chr02:114684471-114686471	Box 4	ATTAAT	381	6	+	Petroselinum crispum	Light responsive element
CaTCP2::chr02:114684471-114686471	Box 4	ATTAAT	1019	6	-	Petroselinum crispum	Light responsive element
CaTCP2::chr02:114684471-114686471	chs-CMA1a	TTACTTAA	392	8	-	Daucus carota	part of a light responsive element
CaTCP2::chr02:114684471-114686471	ARE	AAACCA	1259	6	+	Zea mays	Anaerobic responsive element
CaTCP2::chr02:114684471-114686471	MRE	AACCTAA	1967	7	-	Petroselinum crispum	light responsiveness element
CaTCP2::chr02:114684471-114686471	LTR	CCGAAA	684	6	+	Hordeum vulgare	Low temperature responsive element
CaTCP2::chr02:114684471-114686471	LTR	CCGAAA	1185	6	-	Hordeum vulgare	Low temperature responsive element
CaTCP3::chr02:128951400-128953400	TCA-element	CCATCTTTTT	929	9	+	Nicotiana tabacum	Salicylic acid responsive element
CaTCP3::chr02:128951400-128953400	CAT-box	GCCACT	174	6	+	Arabidopsis thaliana	meristem expression regulation element
CaTCP3::chr02:128951400-128953400	CAT-box	GCCACT	1007	6	+	Arabidopsis thaliana	meristem expression regulation element
CaTCP3::chr02:128951400-128953400	MBS	CAACTG	708	6	-	Arabidopsis thaliana	Drought responsive element
CaTCP3::chr02:128951400-128953400	GATA-motif	GATAGGG	360	7	-	Pisum sativum	part of a light responsive element
CaTCP3::chr02:128951400-128953400	Box 4	ATTAAT	1719	6	-	Petroselinum crispum	Light responsive element
CaTCP3::chr02:128951400-128953400	Box 4	ATTAAT	1757	6	-	Petroselinum crispum	Light responsive element
CaTCP4::chr02:162278087-162280087	ABRE	ACGTG	501	5	+	Arabidopsis thaliana	Abscisic acid responsiveness
CaTCP4::chr02:162278087-162280087	ABRE	ACGTG	909	5	-	Arabidopsis thaliana	Abscisic acid responsiveness
CaTCP4::chr02:162278087-162280087	ABRE	ACGTG	1197	5	+	Arabidopsis thaliana	Abscisic acid responsiveness
CaTCP4::chr02:162278087-162280087	Box 4	ATTAAT	284	6	+	Petroselinum crispum	Light responsive element
CaTCP4::chr02:162278087-162280087	Box 4	ATTAAT	320	6	+	Petroselinum crispum	Light responsive element
CaTCP4::chr02:162278087-162280087	Box 4	ATTAAT	350	6	+	Petroselinum crispum	Light responsive element
CaTCP4::chr02:162278087-162280087	Box 4	ATTAAT	401	6	+	Petroselinum crispum	Light responsive element
CaTCP4::chr02:162278087-162280087	CAT-box	GCCACT	1927	6	+	Arabidopsis thaliana	meristem expression regulation element
CaTCP4::chr02:162278087-162280087	AE-box	AGAAACAA	1290	8	-	Arabidopsis thaliana	Light responsive element
CaTCP4::chr02:162278087-162280087	TCT-motif	TCTTAC	1792	6	+	Arabidopsis thaliana	part of a light responsive element
CaTCP4::chr02:162278087-162280087	TATC-box	TATCCCA	230	7	+	Oryza sativa	GA responsiveness element
CaTCP4::chr02:162278087-162280087	G-box	TACGTG	1196	6	+	Arabidopsis thaliana	Light responsive element
CaTCP5::chr02:163920300-163922300	TGACG-motif	TGACG	1045	5	+	Hordeum vulgare	MeJA responsiveness element
CaTCP5::chr02:163920300-163922300	ABRE	ACGTG	1574	5	+	Arabidopsis thaliana	Abscisic acid responsiveness
CaTCP5::chr02:163920300-163922300	CGTCA-motif	CGTCA	1045	5	-	Hordeum vulgare	MeJA responsiveness element
CaTCP5::chr02:163920300-163922300	TC-rich repeats	ATTCTCTAAC	133	9	-	Nicotiana tabacum	defense and stress responsiveness element
CaTCP6::chr02:168922511-168924511	ABRE	ACGTG	810	5	-	Arabidopsis thaliana	Abscisic acid responsiveness
CaTCP6::chr02:168922511-168924511	ABRE	ACGTG	824	5	-	Arabidopsis thaliana	Abscisic acid responsiveness
CaTCP6::chr02:168922511-168924511	ABRE	ACGTG	1032	5	-	Arabidopsis thaliana	Abscisic acid responsiveness
CaTCP6::chr02:168922511-168924511	ABRE	ACGTG	1065	5	+	Arabidopsis thaliana	Abscisic acid responsiveness
CaTCP6::chr02:168922511-168924511	TGACG-motif	TGACG	564	5	+	Hordeum vulgare	MeJA responsiveness element
CaTCP6::chr02:168922511-168924511	GARE-motif	TCTGTTG	1993	7	+	Brassica oleracea	Gibberellin responsive element
CaTCP6::chr02:168922511-168924511	Box 4	ATTAAT	966	6	+	Petroselinum crispum	Light responsive element
CaTCP6::chr02:168922511-168924511	Box 4	ATTAAT	1399	6	-	Petroselinum crispum	Light responsive element
CaTCP6::chr02:168922511-168924511	CGTCA-motif	CGTCA	564	5	-	Hordeum vulgare	MeJA responsiveness element
CaTCP6::chr02:168922511-168924511	TCT-motif	TCTTAC	866	6	-	Arabidopsis thaliana	part of a light responsive element
CaTCP6::chr02:168922511-168924511	G-Box	CACGTT	1032	6	+	Pisum sativum	Light responsive element
CaTCP6::chr02:168922511-168924511	G-Box	CACGTT	1064	6	-	Pisum sativum	Light responsive element
CaTCP7::chr02:99916177-99918177	Box 4	ATTAAT	309	6	+	Petroselinum crispum	Light responsive element
CaTCP7::chr02:99916177-99918177	Box 4	ATTAAT	975	6	+	Petroselinum crispum	Light responsive element
CaTCP7::chr02:99916177-99918177	Box 4	ATTAAT	1556	6	-	Petroselinum crispum	Light responsive element
CaTCP7::chr02:99916177-99918177	ARE	AAACCA	1334	6	+	Zea mays	Anaerobic responsive element
CaTCP7::chr02:99916177-99918177	ABRE	ACGTG	1320	5	+	Arabidopsis thaliana	Abscisic acid responsiveness
CaTCP8::chr03:217429934-217431934	AE-box	AGAAACAA	1782	8	-	Arabidopsis thaliana	Light responsive element
CaTCP8::chr03:217429934-217431934	CGTCA-motif	CGTCA	1762	5	+	Hordeum vulgare	MeJA responsiveness element
CaTCP8::chr03:217429934-217431934	TCA-element	CCATCTTTTT	535	9	-	Nicotiana tabacum	Salicylic acid responsive element
CaTCP8::chr03:217429934-217431934	G-box	CACGTG	1873	6	-	Arabidopsis thaliana	Light responsive element
CaTCP8::chr03:217429934-217431934	TGACG-motif	TGACG	1762	5	-	Hordeum vulgare	MeJA responsiveness element
CaTCP8::chr03:217429934-217431934	ABRE	ACGTG	1874	5	+	Arabidopsis thaliana	Abscisic acid responsiveness
CaTCP9::chr03:271420278-271422278	AE-box	AGAAACAA	1708	8	+	Arabidopsis thaliana	Light responsive element
CaTCP9::chr03:271420278-271422278	AE-box	AGAAACAA	1720	8	-	Arabidopsis thaliana	Light responsive element
CaTCP9::chr03:271420278-271422278	Box II	CCACGTGGC	699	9	+	Petroselinum crispum	part of a light responsive element
CaTCP9::chr03:271420278-271422278	CGTCA-motif	CGTCA	774	5	-	Hordeum vulgare	MeJA responsiveness element
CaTCP9::chr03:271420278-271422278	TCT-motif	TCTTAC	1743	6	-	Arabidopsis thaliana	part of a light responsive element
CaTCP9::chr03:271420278-271422278	ABRE	ACGTG	723	5	-	Arabidopsis thaliana	Abscisic acid responsiveness
CaTCP9::chr03:271420278-271422278	TGACG-motif	TGACG	774	5	+	Hordeum vulgare	MeJA responsiveness element
CaTCP9::chr03:271420278-271422278	ARE	AAACCA	1556	6	+	Zea mays	Anaerobic responsive element
CaTCP9::chr03:271420278-271422278	Box 4	ATTAAT	869	6	+	Petroselinum crispum	Light responsive element
CaTCP9::chr03:271420278-271422278	Box 4	ATTAAT	873	6	+	Petroselinum crispum	Light responsive element
CaTCP9::chr03:271420278-271422278	Box 4	ATTAAT	984	6	+	Petroselinum crispum	Light responsive element
CaTCP9::chr03:271420278-271422278	G-box	CACGTG	700	6	+	Arabidopsis thaliana	Light responsive element

## Sheet: Sheet2
	CaTCP1	CaTCP2	CaTCP3	CaTCP4	CaTCP5	CaTCP6	CaTCP7	CaTCP8	CaTCP9	CaTCP10	CaTCP11	CaTCP12	CaTCP13	CaTCP14	CaTCP15	CaTCP16	CaTCP17	CaTCP18	CaTCP19	CaTCP20	CaTCP21	CaTCP22	CaTCP23	CaTCP24	CaTCP25	CaTCP26	CaTCP27
Abscisic acid responsiveness	2	0	0	4	3	5	2	3	5	1	2	2	2	1	2	1	4	1	1	0	3	2	1	2	1	7	1
Anaerobic responsive element	2	2	0	1	1	0	2	0	2	0	1	0	1	1	1	1	1	1	1	2	2	0	3	0	0	1	0
anoxic responsiveness element	0	0	0	1	0	0	0	0	0	0	0	0	0	0	0	0	0	0	0	0	0	1	0	1	0	0	0
auxin-responsive element	0	0	0	1	0	1	0	1	1	0	1	0	0	0	1	0	0	0	0	1	0	1	0	0	0	0	1
Auxin responsive element	0	0	0	1	0	0	0	0	0	2	0	0	0	0	0	1	0	0	0	0	0	1	0	0	0	0	0
binding protein	1	1	0	1	0	0	0	0	0	0	0	1	0	0	0	0	0	0	0	0	1	0	1	0	0	0	0
circadian control responsiveness element	1	0	0	0	0	0	1	0	0	0	0	0	0	0	0	2	0	0	0	0	0	0	2	0	0	1	3
cis-acting regulatory element	0	0	0	0	0	0	0	0	0	0	0	0	0	0	0	0	0	0	0	0	0	0	0	1	0	0	0
defense and stress responsiveness element	2	1	0	0	2	1	2	1	0	0	1	0	0	1	0	0	0	0	1	1	2	0	0	0	2	1	2
Drought responsive element	1	0	2	1	0	1	0	0	0	0	2	0	1	0	0	2	0	0	1	0	1	0	1	1	1	0	0
element for maximal elicitor-mediated activation (2copies)	0	0	0	0	1	0	0	0	0	0	0	0	0	0	0	0	0	0	0	0	0	0	0	0	0	0	1
endosperm expression regulation element	0	0	0	0	0	0	0	1	0	0	1	0	0	0	0	0	0	0	0	0	0	0	0	0	1	0	0
GA responsiveness element	0	1	0	2	0	0	0	0	1	0	0	0	0	0	0	0	0	0	1	0	1	0	0	0	0	0	0
Gibberellin responsive element	0	0	0	2	0	2	0	1	0	0	2	1	0	0	0	0	0	0	0	1	0	0	0	0	0	0	0
involved in endosperm-specific negative expression	0	0	0	0	0	0	0	0	0	0	0	0	0	0	0	0	0	0	0	0	0	0	0	0	0	0	1
light responsive element	11	6	7	4	1	6	1	6	7	2	3	4	4	3	6	12	3	4	8	3	4	9	6	1	2	8	5
Light responsive element	10	5	5	12	4	10	8	6	11	4	3	6	2	3	7	8	11	5	9	2	7	3	5	3	3	11	10
light responsiveness element	1	2	1	0	1	0	2	1	1	0	0	0	0	0	0	2	1	3	0	0	0	0	1	0	0	2	0
Low temperature responsive element	1	3	1	1	0	1	1	0	0	1	0	0	0	0	0	0	1	0	0	0	1	1	1	1	0	0	0
MeJA responsiveness element	0	0	0	2	4	4	0	4	4	0	0	0	0	4	0	0	2	2	0	0	2	2	2	4	0	2	2
meristem expression regulation element	0	0	3	2	1	1	0	0	1	0	1	0	1	0	0	0	0	0	1	0	2	0	0	0	0	0	0
mesophyll cells responsiveness element	0	0	0	0	1	0	0	0	0	0	0	0	0	0	0	0	0	2	0	0	0	0	0	0	1	0	0
MYB responsiveness element	0	0	2	0	0	1	0	1	0	0	0	0	0	0	0	0	0	0	0	0	0	0	1	1	0	0	0
part of a light responsive element	8	4	6	3	1	3	1	5	5	2	2	4	3	2	6	9	1	2	5	1	4	9	5	0	2	7	5
part of a light responsive module	0	0	1	0	0	0	0	0	0	0	0	0	0	0	0	0	0	0	0	0	0	1	1	0	0	0	0
part of an auxin-responsive element	0	0	0	0	0	0	0	1	0	0	0	0	0	0	0	0	0	0	0	0	0	0	0	0	0	0	0
Salicylic acid responsive element	0	1	2	0	1	0	1	2	0	1	1	0	0	1	2	1	0	1	0	0	1	0	0	1	0	0	0
seed-specific responsiveness element	0	0	1	0	0	0	0	0	0	0	0	1	0	0	0	0	0	0	0	0	0	0	0	0	0	0	0
zein metabolism regulation element	0	0	0	0	1	0	1	0	0	0	1	2	0	1	0	1	1	0	1	0	0	0	2	1	0	0	1
