# Supplementary material for: Genome-Wide Analysis of the TCP Transcription Factor Gene Family in Pepper (Capsicum annuum L.)
Source: Plants (Basel). 2024 Feb 26;13(5):641. doi: 10.3390/plants13050641 (PMC10934501; doi:10.3390/plants13050641)
Supplement: Supplementary file 1 [file plants-13-00641-s001.zip › Supplementary Table S10.xlsx]

## Sheet: Sheet1
Table S10: Information of predicted protein interaction network
node1	node2	node1_string_id	node2_string_id	neighborhood_on_chromosome	gene_fusion	phylogenetic_cooccurrence	homology	coexpression	experimentally_determined_interaction	database_annotated	automated_textmining	combined_score
CaTCP1	CaTCP22	4072.A0A2G3AE60	4072.A0A1U8DQT7	0	0	0	0.413	0	0.972	0	0.43	0.978
CaTCP1	CaTCP27	4072.A0A2G3AE60	4072.A0A2G2Y1X8	0	0	0	0.382	0	0.983	0	0.803	0.991
CaTCP1	CaTCP14	4072.A0A2G3AE60	4072.A0A2G2ZAX2	0	0	0	0.396	0	0.865	0	0.496	0.903
CaTCP1	CaTCP13	4072.A0A2G3AE60	4072.A0A2G2ZGG7	0	0	0	0.521	0	0.972	0	0.43	0.977
CaTCP1	CaTCP8	4072.A0A2G3AE60	4072.A0A2G2ZYU5	0	0	0	0.691	0	0.982	0	0	0.982
CaTCP10	CaTCP16	4072.A0A2G3A2C1	4072.A0A1U8F966	0	0	0	0.211	0	0.837	0	0.64	0.917
CaTCP12	CaTCP5	4072.A0A2G2ZI89	4072.A0A1U8FJP5	0	0	0	0.416	0	0.971	0	0.233	0.974
CaTCP12	CaTCP14	4072.A0A2G2ZI89	4072.A0A2G2ZAX2	0	0	0	0.228	0	0.97	0	0.258	0.975
CaTCP13	CaTCP17	4072.A0A2G2ZGG7	4072.A0A1U8HB36	0	0	0	0.774	0	0.971	0	0.271	0.972
CaTCP14	CaTCP16	4072.A0A2G2ZAX2	4072.A0A1U8F966	0	0	0	0.211	0	0.985	0	0.551	0.991
CaTCP14	CaTCP2	4072.A0A2G2ZAX2	4072.A0A1U8FTV3	0	0	0	0.5	0	0.978	0	0.426	0.982
CaTCP14	CaTCP17	4072.A0A2G2ZAX2	4072.A0A1U8HB36	0	0	0	0.554	0	0.977	0	0.376	0.98
CaTCP14	CaTCP18	4072.A0A2G2ZAX2	4072.A0A1U8HI65	0	0	0	0.231	0	0.981	0	0	0.981
CaTCP14	CaTCP8	4072.A0A2G2ZAX2	4072.A0A2G2ZYU5	0	0	0	0.469	0	0.893	0	0.567	0.924
CaTCP15	CaTCP5	4072.A0A1U8F959	4072.A0A1U8FJP5	0	0	0	0.391	0	0.971	0	0.556	0.98
CaTCP16	CaTCP25	4072.A0A1U8F966	4072.A0A1U8EJQ0	0	0	0	0.221	0	0.869	0	0.369	0.903
CaTCP16	CaTCP27	4072.A0A1U8F966	4072.A0A2G2Y1X8	0	0	0	0.221	0	0.855	0	0.445	0.902
CaTCP16	CaTCP5	4072.A0A1U8F966	4072.A0A1U8FJP5	0	0	0	0.367	0	0.869	0	0.44	0.903
CaTCP16	CaTCP24	4072.A0A1U8F966	4072.A0A2G2YPZ2	0	0	0	0	0	0.857	0	0.445	0.917
CaTCP16	CaTCP8	4072.A0A1U8F966	4072.A0A2G2ZYU5	0	0	0	0.211	0	0.857	0	0.553	0.917
CaTCP16	CaTCP20	4072.A0A1U8F966	4072.A0A1U8FDN7	0	0	0	0.425	0	0.973	0	0.43	0.979
CaTCP16	CaTCP21	4072.A0A1U8F966	4072.A0A1U8FNU1	0	0	0	0.418	0	0.973	0	0.43	0.979
CaTCP16	CaTCP4	4072.A0A1U8F966	4072.A0A1U8FTU4	0	0	0	0.639	0.253	0.971	0	0.331	0.979
CaTCP16	CaTCP7	4072.A0A1U8F966	4072.A0A2G3A5K7	0	0	0	0.507	0.253	0.971	0	0.331	0.98
CaTCP16	CaTCP3	4072.A0A1U8F966	4072.A0A1U8FS93	0	0	0	0.378	0	0.977	0	0.374	0.981
CaTCP16	CaTCP18	4072.A0A1U8F966	4072.A0A1U8HI65	0	0	0	0.382	0	0.982	0	0	0.982
CaTCP16	CaTCP9	4072.A0A1U8F966	4072.A0A1U8FW09	0	0	0	0.719	0.253	0.977	0	0.331	0.983
CaTCP17	CaTCP22	4072.A0A1U8HB36	4072.A0A1U8DQT7	0	0	0	0.598	0	0.971	0	0.271	0.973
CaTCP17	CaTCP20	4072.A0A1U8HB36	4072.A0A1U8FDN7	0	0	0	0.183	0	0.967	0	0.266	0.973
CaTCP17	CaTCP21	4072.A0A1U8HB36	4072.A0A1U8FNU1	0	0	0	0.189	0	0.967	0	0.266	0.973
CaTCP17	CaTCP27	4072.A0A1U8HB36	4072.A0A2G2Y1X8	0	0	0	0	0	0.978	0	0.388	0.985
CaTCP18	CaTCP20	4072.A0A1U8HI65	4072.A0A1U8FDN7	0	0	0	0.384	0	0.972	0	0.611	0.982
CaTCP18	CaTCP21	4072.A0A1U8HI65	4072.A0A1U8FNU1	0	0	0	0.381	0	0.972	0	0.611	0.982
CaTCP18	CaTCP4	4072.A0A1U8HI65	4072.A0A1U8FTU4	0	0	0	0.386	0	0.969	0	0.53	0.978
CaTCP18	CaTCP7	4072.A0A1U8HI65	4072.A0A2G3A5K7	0	0	0	0.376	0	0.969	0	0.53	0.978
CaTCP2	CaTCP25	4072.A0A1U8FTV3	4072.A0A1U8EJQ0	0	0	0	0.499	0	0.973	0	0.269	0.976
CaTCP20	CaTCP25	4072.A0A1U8FDN7	4072.A0A1U8EJQ0	0	0	0	0.194	0	0.967	0	0.266	0.973
CaTCP20	CaTCP4	4072.A0A1U8FDN7	4072.A0A1U8FTU4	0	0	0	0.458	0	0.952	0	0.233	0.957
CaTCP20	CaTCP7	4072.A0A1U8FDN7	4072.A0A2G3A5K7	0	0	0	0.413	0	0.952	0	0.233	0.957
CaTCP20	CaTCP9	4072.A0A1U8FDN7	4072.A0A1U8FW09	0	0	0	0.384	0	0.963	0	0.466	0.973
CaTCP20	CaTCP5	4072.A0A1U8FDN7	4072.A0A1U8FJP5	0	0	0	0.373	0	0.972	0	0.303	0.976
CaTCP20	CaTCP27	4072.A0A1U8FDN7	4072.A0A2G2Y1X8	0	0	0	0.18	0	0.973	0	0.388	0.981
CaTCP21	CaTCP25	4072.A0A1U8FNU1	4072.A0A1U8EJQ0	0	0	0	0.211	0	0.967	0	0.266	0.973
CaTCP21	CaTCP5	4072.A0A1U8FNU1	4072.A0A1U8FJP5	0	0	0	0.376	0	0.972	0	0.303	0.976
CaTCP21	CaTCP4	4072.A0A1U8FNU1	4072.A0A1U8FTU4	0	0	0	0.449	0	0.952	0	0.233	0.957
CaTCP21	CaTCP7	4072.A0A1U8FNU1	4072.A0A2G3A5K7	0	0	0	0.413	0	0.952	0	0.233	0.957
CaTCP21	CaTCP9	4072.A0A1U8FNU1	4072.A0A1U8FW09	0	0	0	0.381	0	0.963	0	0.466	0.973
CaTCP21	CaTCP27	4072.A0A1U8FNU1	4072.A0A2G2Y1X8	0	0	0	0.193	0	0.973	0	0.388	0.98
CaTCP25	CaTCP9	4072.A0A1U8EJQ0	4072.A0A1U8FW09	0	0	0	0.202	0	0.966	0	0	0.966
CaTCP25	CaTCP27	4072.A0A1U8EJQ0	4072.A0A2G2Y1X8	0	0	0	0.469	0	0.978	0	0.388	0.982
CaTCP27	CaTCP8	4072.A0A2G2Y1X8	4072.A0A2G2ZYU5	0	0	0	0.449	0	0.901	0	0.753	0.941
CaTCP4	CaTCP5	4072.A0A1U8FTU4	4072.A0A1U8FJP5	0	0	0	0.373	0	0.969	0	0.446	0.977
CaTCP5	CaTCP7	4072.A0A1U8FJP5	4072.A0A2G3A5K7	0	0	0	0.37	0	0.969	0	0.446	0.977
The String website was used to predict the protein-protein interaction network.
