# Supplementary material for: Genome-Wide Analysis of the TCP Transcription Factor Gene Family in Pepper (Capsicum annuum L.)
Source: Plants (Basel). 2024 Feb 26;13(5):641. doi: 10.3390/plants13050641 (PMC10934501; doi:10.3390/plants13050641)
Supplement: Supplementary file 1 [file plants-13-00641-s001.zip › Supplementary Table S11.xlsx]

## Sheet: Sheet1
Table S11: Stability and secondary structure percentage of CaTCP genes protein models
ID	core	allow	gener	disall	Alpha helix	Beta turn	Random coil	Extended strand
TCP1	0.849	0.12	0.017	0.013	0.1366	0.0349	0.7471	0.0814
TCP2	0.874	0.105	0.008	0.013	0.2421	0.0667	0.5754	0.1158
TCP3	0.87	0.12	0.003	0.006	0.1846	0.0248	0.6694	0.1212
TCP4	0.825	0.163	0.008	0.004	0.1054	0.034	0.7143	0.1463
TCP5	0.914	0.074	0.008	0.004	0.3652	0.0426	0.422	0.1702
TCP6	0.854	0.133	0.008	0.004	0.1871	0.034	0.6905	0.0884
TCP7	0.867	0.117	0.008	0.008	0.2282	0.0436	0.5503	0.1779
TCP8	0.891	0.099	0.003	0.007	0.1676	0.0455	0.6648	0.1222
TCP9	0.866	0.118	0.013	0.003	0.1053	0.0139	0.7895	0.0914
TCP11	0.827	0.15	0.01	0.013	0.3343	0.009	0.5482	0.1084
TCP12	0.85	0.124	0.011	0.014	0.2919	0.0203	0.6269	0.0609
TCP14	0.881	0.115	0	0.004	0.1634	0.0359	0.6046	0.1961
TCP15	0.905	0.061	0.015	0.018	0.3603	0.0196	0.5307	0.0894
TCP16	0.878	0.119	0.004	0	0.0806	0.0258	0.7645	0.129
TCP17	0.825	0.155	0.014	0.006	0.1659	0.0457	0.6923	0.0962
TCP18	0.863	0.107	0.011	0.019	0.1564	0.0261	0.7166	0.101
TCP19	0.85	0.141	0.003	0.006	0.1476	0.0254	0.7099	0.117
TCP20	0.846	0.144	0.008	0.003	0.1682	0.0257	0.7056	0.1005
TCP21	0.821	0.146	0.022	0.011	0.1587	0.0192	0.7163	0.1058
TCP22	0.844	0.142	0.005	0.009	0.1685	0.0712	0.603	0.1573
TCP25	0.867	0.123	0	0.009	0.194	0.041	0.6612	0.1038
TCP26	0.859	0.135	0	0.006	0.2283	0.0231	0.6503	0.0983
SOPMA website was used to analyze the secondary structure of the chosen models.
