# Supplementary material for: Genome-Wide Analysis of the TCP Transcription Factor Gene Family in Pepper (Capsicum annuum L.)
Source: Plants (Basel). 2024 Feb 26;13(5):641. doi: 10.3390/plants13050641 (PMC10934501; doi:10.3390/plants13050641)
Supplement: Supplementary file 1 [file plants-13-00641-s001.zip › Supplementary Table S12.xlsx]

## Sheet: Sheet1
Table S12: Primers for qRT-PCR
Gene ID	Forward Primer	Reverse Primer
CaTCP1	CTCGGATCTTTCAGTTGACC	CAGTAGCTTCAATAATGGCTT
CaTCP2	CTTCGATTATTGCTGCTACCG	TATTTTCGCCTGATTCGTCCA
CaTCP3	CCGAAGAGTTAGGCTATCACC	AATCAATGGCCTTACTTGGAC
CaTCP4	AACTTAATGCCTAGTATGCC	AAAGTTGATTTCTTTCGGAT
CaTCP5	CTTACTTACCCTCAAACGGTCA	TGATGTCAAAATCTTACTGTGC
CaTCP6	CGGAGCCATCCATAATTGCTG	AATACTTGCACCCAATTCACC
CaTCP7	GAGTTCTGCCAAATCTTGACC	GTATTGCCACTCCATGATGC
CaTCP8	TAGTAGCCCTACAACTTACGC	ACAAAATTTGAAATGGGCCTT
CaTCP9	CAAACCAGCAAGAAAATCACC	GGCTCCCATTGATAGTACGAA
CaTCP10	TCAGGTTCCAGCATGTCCGTA	TTCCAGGAAATAGCCCTCGT
CaTCP11	AACCTTCTGGCAATTACAGC	AAATTCGGGTTCGTATTGCAT
CaTCP12	AATTCTCAATCTCTAGGGCAT	AATTGCCAGAATCTAATCCTG
CaTCP13	CTTCTATTATTGCTGCTACTGG	CGAACTAATACCCGTCGATG
CaTCP14	TTTAGAGACTCGCATAACGAA	TTTAGATGGCTTCTTAACAAC
CaTCP15	AGAAAATGAGCCAAATTGACA	ACGAGTTTTATTAATGGGCTT
CaTCP16	GCCACAAATCATCATGAGCAA	CCCAAGTATGGCTTATCAAGG
CaTCP17	CATTTCACCATCCGATACGAA	TGATCTCAGTATTAGAGGCAAC
CaTCP18	CAAATTATCCAAGAATGGCAAG	GTTCCCTTTGAGTAAATGCAC
CaTCP19	TGTTGCCAAGAACCAATAGCC	TTGAACCTGCACTTGTTCCCT
CaTCP20	AGGTTTTCTCCTATAAACGGAT	GATCTGAATGTCCATAGCCAT
CaTCP21	GCTTTCTCCTACAGACGGAT	GTGTCCATAGCCATTGCCAT
CaTCP22	GCGAAAGACCGTCATAGCAA	TTCAGCTTGACGGAGTAACCA
CaTCP23	CAAGATCCCATTTTGCTCGAC	CCTGAAGCACCAAAACCGAT
CaTCP24	CCGTCAATGAGTTTATCGCAAT	CTGCTGCGAGTAAAATCCACT
CaTCP25	ACAGACACACAAAGGTCGATG	TCAGCTTGTTGTAATAGCCAT
CaTCP26	CATGAACTCCCATTAAGCCAA	TGGTCTCCCATGATTTTCGC
CaTCP27	TGCTGCTCACCATACCCCTC	CCCGGTAATGATTCTCCGAT
These primers were designed using primer-blast in NCBI.
